# Supplementary material for: Attribution of global foodborne disease to specific foods: Findings from a World Health Organization structured expert elicitation
Source: PubMed Central journal article supplement (PMC5598938; doi:10.1371/journal.pone.0183641), 2017-09-14
Supplement: pone.0183641.s001.pdf [file pone.0183641.s001.pdf]

**S1 Table. Median proportion of total foodborne cases attributed to exposure to specified foods, by subregions for selected parasites.**

|                                             | AFR D               | AFR E               | AMR A               | AMR B               | AMR D               | EMR B               | EMR D               | EUR A               | EUR B               | EUR C               | SEAR B              | SEAR D              | WPR A               | WPR B               |
|---------------------------------------------|---------------------|---------------------|---------------------|---------------------|---------------------|---------------------|---------------------|---------------------|---------------------|---------------------|---------------------|---------------------|---------------------|---------------------|
| <i>Number of Experts</i>                    | 9                   | 11                  | 12                  | 10                  | 5                   | 2                   | 5                   | 20                  | 5                   | 2                   | 3                   | 12                  | 4                   | 3                   |
| <i>Ascaris spp.</i>                         |                     |                     |                     |                     |                     |                     |                     |                     |                     |                     |                     |                     |                     |                     |
| Percent of total disease that is foodborne* | 0.38<br>(0.10-0.66) | 0.38<br>(0.07-0.67) | 0.83<br>(0.43-0.97) | 0.55<br>(0.17-0.75) | 0.37<br>(0.07-0.68) | 0.55<br>(0.15-0.77) | 0.55<br>(0.18-0.75) | 0.85<br>(0.47-0.97) | 0.55<br>(0.13-0.76) | 0.55<br>(0.14-0.76) | 0.54<br>(0.18-0.75) | 0.39<br>(0.11-0.68) | 0.85<br>(0.47-0.97) | 0.54<br>(0.16-0.77) |
| Percent of foodborne disease attributed to: |                     |                     |                     |                     |                     |                     |                     |                     |                     |                     |                     |                     |                     |                     |
| Fruits                                      | 0.21<br>(0.00-0.48) | 0.21<br>(0.00-0.48) | 0.06<br>(0.00-0.36) | 0.06<br>(0.00-0.39) | 0.21<br>(0.00-0.47) | 0.06<br>(0.00-0.36) | 0.22<br>(0.00-0.48) | 0.06<br>(0.00-0.36) | 0.06<br>(0.00-0.37) | 0.21<br>(0.02-0.46) | 0.06<br>(0.00-0.40) | 0.21<br>(0.00-0.48) | 0.06<br>(0.00-0.39) | 0.06<br>(0.00-0.35) |
| Vegetables                                  | 0.77<br>(0.50-0.98) | 0.77<br>(0.50-0.98) | 0.94<br>(0.62-1.00) | 0.93<br>(0.60-1.00) | 0.77<br>(0.51-0.98) | 0.93<br>(0.62-1.00) | 0.77<br>(0.50-0.99) | 0.93<br>(0.63-1.00) | 0.93<br>(0.62-1.00) | 0.78<br>(0.52-0.97) | 0.92<br>(0.58-1.00) | 0.77<br>(0.50-0.99) | 0.93<br>(0.59-1.00) | 0.93<br>(0.62-1.00) |
| Other                                       | 0.00<br>(0.00-0.14) | 0.00<br>(0.00-0.15) | 0.00<br>(0.00-0.12) | 0.00<br>(0.00-0.12) | 0.00<br>(0.00-0.13) | 0.00<br>(0.00-0.13) | 0.00<br>(0.00-0.14) | 0.00<br>(0.00-0.13) | 0.00<br>(0.00-0.13) | 0.00<br>(0.00-0.14) | 0.00<br>(0.00-0.12) | 0.00<br>(0.00-0.14) | 0.00<br>(0.00-0.13) | 0.00<br>(0.00-0.13) |
| <i>Cryptosporidium spp.</i>                 |                     |                     |                     |                     |                     |                     |                     |                     |                     |                     |                     |                     |                     |                     |
| Percent of total disease that is foodborne* | 0.15<br>(0.00-0.44) | 0.15<br>(0.00-0.47) | 0.16<br>(0.01-0.44) | 0.11<br>(0.01-0.38) | 0.16<br>(0.01-0.44) | 0.09<br>(0.00-0.41) | 0.08<br>(0.00-0.36) | 0.10<br>(0.00-0.39) | 0.11<br>(0.00-0.39) | 0.09<br>(0.00-0.40) | 0.10<br>(0.00-0.37) | 0.10<br>(0.00-0.42) | 0.10<br>(0.00-0.40) | 0.10<br>(0.00-0.45) |
| Percent of foodborne disease attributed to: |                     |                     |                     |                     |                     |                     |                     |                     |                     |                     |                     |                     |                     |                     |
| Dairy                                       | 0.03<br>(0.00-0.41) | 0.04<br>(0.00-0.46) | 0.05<br>(0.00-0.29) | 0.08<br>(0.00-0.35) | 0.08<br>(0.00-0.36) | 0.04<br>(0.00-0.49) | 0.02<br>(0.00-0.46) | 0.04<br>(0.00-0.40) | 0.04<br>(0.00-0.44) | 0.05<br>(0.00-0.49) | 0.02<br>(0.00-0.38) | 0.02<br>(0.00-0.40) | 0.02<br>(0.00-0.33) | 0.02<br>(0.00-0.44) |
| Fruits                                      | 0.31<br>(0.00-0.78) | 0.29<br>(0.00-0.78) | 0.31<br>(0.02-0.71) | 0.27<br>(0.01-0.65) | 0.24<br>(0.02-0.63) | 0.24<br>(0.02-0.66) | 0.23<br>(0.02-0.63) | 0.26<br>(0.01-0.66) | 0.25<br>(0.00-0.67) | 0.23<br>(0.01-0.65) | 0.25<br>(0.00-0.63) | 0.26<br>(0.02-0.69) | 0.25<br>(0.00-0.61) | 0.24<br>(0.02-0.65) |
| Vegetables                                  | 0.56<br>(0.08-0.91) | 0.56<br>(0.07-0.92) | 0.61<br>(0.14-0.88) | 0.62<br>(0.18-0.88) | 0.65<br>(0.19-0.89) | 0.60<br>(0.13-0.90) | 0.62<br>(0.15-0.91) | 0.61<br>(0.19-0.91) | 0.60<br>(0.18-0.91) | 0.61<br>(0.18-0.91) | 0.64<br>(0.21-0.92) | 0.63<br>(0.13-0.92) | 0.64<br>(0.28-0.92) | 0.64<br>(0.16-0.92) |

|       |                         |                         |                         |                         |                         |                         |                         |                         |                         |                         |                         |                         |                         |                         |
|-------|-------------------------|-------------------------|-------------------------|-------------------------|-------------------------|-------------------------|-------------------------|-------------------------|-------------------------|-------------------------|-------------------------|-------------------------|-------------------------|-------------------------|
| Other | 0.00<br>(0.00-<br>0.21) | 0.00<br>(0.00-<br>0.21) | 0.00<br>(0.00-<br>0.09) | 0.00<br>(0.00-<br>0.10) | 0.00<br>(0.00-<br>0.13) | 0.02<br>(0.00-<br>0.21) | 0.01<br>(0.00-<br>0.21) | 0.02<br>(0.00-<br>0.13) | 0.02<br>(0.00-<br>0.13) | 0.02<br>(0.00-<br>0.14) | 0.01<br>(0.00-<br>0.25) | 0.01<br>(0.00-<br>0.20) | 0.01<br>(0.00-<br>0.23) | 0.01<br>(0.00-<br>0.16) |
|-------|-------------------------|-------------------------|-------------------------|-------------------------|-------------------------|-------------------------|-------------------------|-------------------------|-------------------------|-------------------------|-------------------------|-------------------------|-------------------------|-------------------------|

|                          | <i>AFR D</i> | <i>AFR E</i> | <i>AMR A</i> | <i>AMR B</i> | <i>AMR D</i> | <i>EMR B</i> | <i>EMR D</i> | <i>EUR A</i> | <i>EUR B</i> | <i>EUR C</i> | <i>SEAR B</i> | <i>SEAR D</i> | <i>WPR A</i> | <i>WPR B</i> |
|--------------------------|--------------|--------------|--------------|--------------|--------------|--------------|--------------|--------------|--------------|--------------|---------------|---------------|--------------|--------------|
| <i>Number of Experts</i> | 9            | 11           | 12           | 10           | 5            | 2            | 5            | 20           | 5            | 2            | 3             | 12            | 4            | 3            |

*Echinococcus granulosus*

|                                             |                         |                         |                         |                         |                         |                         |                         |                         |                         |                         |                         |                         |                         |                         |
|---------------------------------------------|-------------------------|-------------------------|-------------------------|-------------------------|-------------------------|-------------------------|-------------------------|-------------------------|-------------------------|-------------------------|-------------------------|-------------------------|-------------------------|-------------------------|
| Percent of total disease that is foodborne* | 0.21<br>(0.07-<br>0.42) | 0.20<br>(0.05-<br>0.40) | 0.20<br>(0.03-<br>0.40) | 0.20<br>(0.02-<br>0.43) | 0.21<br>(0.05-<br>0.41) | 0.21<br>(0.05-<br>0.43) | 0.21<br>(0.06-<br>0.41) | 0.21<br>(0.04-<br>0.40) | 0.21<br>(0.06-<br>0.40) | 0.21<br>(0.04-<br>0.40) | 0.21<br>(0.03-<br>0.44) | 0.20<br>(0.06-<br>0.40) | 0.20<br>(0.01-<br>0.39) | 0.21<br>(0.05-<br>0.43) |
|---------------------------------------------|-------------------------|-------------------------|-------------------------|-------------------------|-------------------------|-------------------------|-------------------------|-------------------------|-------------------------|-------------------------|-------------------------|-------------------------|-------------------------|-------------------------|

Percent of foodborne disease attributed to:

|            |                         |                         |                         |                         |                         |                         |                         |                         |                         |                         |                         |                         |                         |                         |
|------------|-------------------------|-------------------------|-------------------------|-------------------------|-------------------------|-------------------------|-------------------------|-------------------------|-------------------------|-------------------------|-------------------------|-------------------------|-------------------------|-------------------------|
| Fruits     | 0.22<br>(0.03-<br>0.53) | 0.22<br>(0.03-<br>0.45) | 0.22<br>(0.02-<br>0.53) | 0.23<br>(0.04-<br>0.52) | 0.22<br>(0.03-<br>0.52) | 0.21<br>(0.02-<br>0.48) | 0.23<br>(0.02-<br>0.49) | 0.22<br>(0.02-<br>0.54) | 0.21<br>(0.03-<br>0.49) | 0.23<br>(0.02-<br>0.51) | 0.22<br>(0.02-<br>0.55) | 0.21<br>(0.01-<br>0.49) | 0.21<br>(0.02-<br>0.48) | 0.21<br>(0.01-<br>0.46) |
| Vegetables | 0.77<br>(0.45-<br>0.96) | 0.77<br>(0.49-<br>0.96) | 0.77<br>(0.45-<br>0.98) | 0.76<br>(0.44-<br>0.95) | 0.77<br>(0.43-<br>0.96) | 0.78<br>(0.50-<br>0.97) | 0.77<br>(0.49-<br>0.98) | 0.77<br>(0.40-<br>0.97) | 0.78<br>(0.48-<br>0.96) | 0.76<br>(0.47-<br>0.97) | 0.77<br>(0.42-<br>0.97) | 0.78<br>(0.50-<br>0.98) | 0.78<br>(0.49-<br>0.98) | 0.78<br>(0.51-<br>0.98) |
| Other      | 0.00<br>(0.00-<br>0.14) | 0.00<br>(0.00-<br>0.25) | 0.00<br>(0.00-<br>0.13) | 0.00<br>(0.00-<br>0.22) | 0.00<br>(0.00-<br>0.24) | 0.00<br>(0.00-<br>0.13) | 0.00<br>(0.00-<br>0.14) | 0.00<br>(0.00-<br>0.31) | 0.00<br>(0.00-<br>0.15) | 0.00<br>(0.00-<br>0.13) | 0.00<br>(0.00-<br>0.16) | 0.00<br>(0.00-<br>0.14) | 0.00<br>(0.00-<br>0.13) | 0.00<br>(0.00-<br>0.17) |

*Echinococcus multilocularis*

|                                             |  |  |                         |  |  |                         |                         |                         |                         |                         |  |                         |                         |                         |
|---------------------------------------------|--|--|-------------------------|--|--|-------------------------|-------------------------|-------------------------|-------------------------|-------------------------|--|-------------------------|-------------------------|-------------------------|
| Percent of total disease that is foodborne* |  |  | 0.51<br>(0.13-<br>0.79) |  |  | 0.43<br>(0.09-<br>0.73) | 0.48<br>(0.00-<br>0.77) | 0.52<br>(0.15-<br>0.79) | 0.45<br>(0.12-<br>0.72) | 0.44<br>(0.12-<br>0.72) |  | 0.58<br>(0.00-<br>0.88) | 0.51<br>(0.09-<br>0.81) | 0.48<br>(0.00-<br>0.78) |
|---------------------------------------------|--|--|-------------------------|--|--|-------------------------|-------------------------|-------------------------|-------------------------|-------------------------|--|-------------------------|-------------------------|-------------------------|

|            |  |  |                         |  |  |                         |                         |                         |                         |                         |  |                         |                         |                         |
|------------|--|--|-------------------------|--|--|-------------------------|-------------------------|-------------------------|-------------------------|-------------------------|--|-------------------------|-------------------------|-------------------------|
| Fruits     |  |  | 0.46<br>(0.06-<br>0.89) |  |  | 0.44<br>(0.07-<br>0.86) | 0.41<br>(0.00-<br>1.00) | 0.46<br>(0.13-<br>0.89) | 0.45<br>(0.11-<br>0.79) | 0.43<br>(0.09-<br>0.76) |  | 0.41<br>(0.00-<br>1.00) | 0.45<br>(0.07-<br>0.89) | 0.41<br>(0.00-<br>1.00) |
| Vegetables |  |  | 0.54<br>(0.10-<br>0.93) |  |  | 0.54<br>(0.08-<br>0.89) | 0.59<br>(0.00-<br>1.00) | 0.53<br>(0.09-<br>0.86) | 0.55<br>(0.20-<br>0.88) | 0.54<br>(0.21-<br>0.87) |  | 0.59<br>(0.00-<br>1.00) | 0.55<br>(0.11-<br>0.93) | 0.58<br>(0.00-<br>1.00) |

|       |                         |      |                         |                         |                         |                         |                         |      |                         |                         |                         |
|-------|-------------------------|------|-------------------------|-------------------------|-------------------------|-------------------------|-------------------------|------|-------------------------|-------------------------|-------------------------|
| Other | 0.00<br>(0.00-<br>0.01) | 0.00 | 0.00<br>(0.00-<br>0.10) | 0.00<br>(0.00-<br>0.00) | 0.00<br>(0.00-<br>0.06) | 0.00<br>(0.00-<br>0.09) | 0.00<br>(0.00-<br>0.11) | 0.00 | 0.00<br>(0.00-<br>0.00) | 0.00<br>(0.00-<br>0.01) | 0.00<br>(0.00-<br>0.22) |
|-------|-------------------------|------|-------------------------|-------------------------|-------------------------|-------------------------|-------------------------|------|-------------------------|-------------------------|-------------------------|

*Entamoeba histolytica*

|                                                   |                         |                         |                         |                         |                         |                         |                         |                         |                         |                         |                         |                         |                         |                         |
|---------------------------------------------------|-------------------------|-------------------------|-------------------------|-------------------------|-------------------------|-------------------------|-------------------------|-------------------------|-------------------------|-------------------------|-------------------------|-------------------------|-------------------------|-------------------------|
| Percent of total<br>disease that is<br>foodborne* | 0.30<br>(0.00-<br>0.68) | 0.30<br>(0.00-<br>0.68) | 0.25<br>(0.00-<br>0.70) | 0.21<br>(0.00-<br>0.62) | 0.17<br>(0.00-<br>0.58) | 0.24<br>(0.00-<br>0.62) | 0.28<br>(0.00-<br>0.66) | 0.33<br>(0.00-<br>0.71) | 0.30<br>(0.00-<br>0.66) | 0.26<br>(0.00-<br>0.64) | 0.26<br>(0.00-<br>0.65) | 0.25<br>(0.00-<br>0.63) | 0.25<br>(0.00-<br>0.62) | 0.27<br>(0.00-<br>0.63) |
|---------------------------------------------------|-------------------------|-------------------------|-------------------------|-------------------------|-------------------------|-------------------------|-------------------------|-------------------------|-------------------------|-------------------------|-------------------------|-------------------------|-------------------------|-------------------------|

|            |                         |                         |                         |                         |                         |                         |                         |                         |                         |                         |                         |                         |                         |                         |
|------------|-------------------------|-------------------------|-------------------------|-------------------------|-------------------------|-------------------------|-------------------------|-------------------------|-------------------------|-------------------------|-------------------------|-------------------------|-------------------------|-------------------------|
| Fruits     | 0.32<br>(0.05-<br>0.66) | 0.31<br>(0.05-<br>0.66) | 0.25<br>(0.05-<br>0.59) | 0.22<br>(0.05-<br>0.57) | 0.17<br>(0.01-<br>0.57) | 0.33<br>(0.04-<br>0.67) | 0.33<br>(0.04-<br>0.68) | 0.30<br>(0.04-<br>0.61) | 0.33<br>(0.04-<br>0.67) | 0.34<br>(0.05-<br>0.67) | 0.29<br>(0.05-<br>0.62) | 0.30<br>(0.04-<br>0.61) | 0.32<br>(0.05-<br>0.64) | 0.32<br>(0.04-<br>0.64) |
| Vegetables | 0.64<br>(0.29-<br>0.90) | 0.64<br>(0.29-<br>0.90) | 0.71<br>(0.38-<br>0.91) | 0.74<br>(0.39-<br>0.92) | 0.79<br>(0.39-<br>0.96) | 0.62<br>(0.28-<br>0.90) | 0.62<br>(0.28-<br>0.89) | 0.66<br>(0.35-<br>0.90) | 0.62<br>(0.27-<br>0.90) | 0.62<br>(0.28-<br>0.89) | 0.66<br>(0.34-<br>0.90) | 0.66<br>(0.35-<br>0.90) | 0.64<br>(0.32-<br>0.90) | 0.64<br>(0.32-<br>0.89) |
| Other      | 0.03<br>(0.00-<br>0.16) | 0.03<br>(0.00-<br>0.17) | 0.00<br>(0.00-<br>0.15) | 0.00<br>(0.00-<br>0.15) | 0.00<br>(0.00-<br>0.15) | 0.03<br>(0.00-<br>0.16) | 0.03<br>(0.00-<br>0.17) | 0.02<br>(0.00-<br>0.15) | 0.03<br>(0.00-<br>0.17) | 0.03<br>(0.00-<br>0.16) | 0.03<br>(0.00-<br>0.15) | 0.03<br>(0.00-<br>0.15) | 0.03<br>(0.00-<br>0.16) | 0.03<br>(0.00-<br>0.15) |

\*Percent of total disease estimated to be foodborne is taken from Hald et al. (2016) and reported here to provide perspective. Numbers in parentheses are 5<sup>th</sup> and 95<sup>th</sup> percentile values.
