# Supplementary material for: Attribution of global foodborne disease to specific foods: Findings from a World Health Organization structured expert elicitation
Source: PubMed Central journal article supplement (PMC5598938; doi:10.1371/journal.pone.0183641), 2017-09-14
Supplement: pone.0183641.s002.pdf [file pone.0183641.s002.pdf]

**S2 Table. Median proportion of total foodborne cases attributed to exposure to specified foods, by subregions for selected bacteria.**

|                                             | AFR D               | AFR E               | AMR A               | AMR B               | AMR D               | EMR B               | EMR D               | EUR A               | EUR B               | EUR C               | SEAR B              | SEAR D              | WPR A               | WPR B               |
|---------------------------------------------|---------------------|---------------------|---------------------|---------------------|---------------------|---------------------|---------------------|---------------------|---------------------|---------------------|---------------------|---------------------|---------------------|---------------------|
| <i>Number of Experts</i>                    | 9                   | 11                  | 12                  | 10                  | 5                   | 2                   | 5                   | 20                  | 5                   | 2                   | 3                   | 12                  | 4                   | 3                   |
| <i>Brucella spp.</i>                        |                     |                     |                     |                     |                     |                     |                     |                     |                     |                     |                     |                     |                     |                     |
| Percent of total disease that is foodborne* | 0.44<br>(0.10-0.68) | 0.44<br>(0.06-0.70) | 0.75<br>(0.28-0.93) | 0.44<br>(0.09-0.69) | 0.44<br>(0.09-0.72) | 0.51<br>(0.08-0.80) | 0.44<br>(0.07-0.70) | 0.66<br>(0.23-0.90) | 0.45<br>(0.09-0.71) | 0.44<br>(0.10-0.73) | 0.51<br>(0.07-0.81) | 0.45<br>(0.07-0.70) | 0.71<br>(0.28-0.92) | 0.51<br>(0.07-0.80) |
| Percent of foodborne disease attributed to: |                     |                     |                     |                     |                     |                     |                     |                     |                     |                     |                     |                     |                     |                     |
| Beef                                        | 0.05<br>(0.00-0.11) | 0.05<br>(0.00-0.11) | 0.03<br>(0.00-0.14) | 0.05<br>(0.00-0.11) | 0.05<br>(0.00-0.11) | 0.03<br>(0.00-0.11) | 0.05<br>(0.00-0.13) | 0.03<br>(0.00-0.07) | 0.05<br>(0.00-0.11) | 0.05<br>(0.00-0.11) | 0.05<br>(0.00-0.11) | 0.05<br>(0.00-0.11) | 0.03<br>(0.00-0.13) | 0.05<br>(0.00-0.12) |
| Dairy                                       | 0.68<br>(0.50-0.86) | 0.68<br>(0.45-0.87) | 0.91<br>(0.62-0.96) | 0.78<br>(0.60-0.90) | 0.77<br>(0.58-0.89) | 0.81<br>(0.66-0.93) | 0.68<br>(0.49-0.86) | 0.90<br>(0.66-0.96) | 0.80<br>(0.61-0.91) | 0.78<br>(0.58-0.89) | 0.79<br>(0.57-0.90) | 0.68<br>(0.49-0.87) | 0.90<br>(0.65-0.96) | 0.79<br>(0.50-0.90) |
| Goat, Lamb and other small ruminant meats   | 0.19<br>(0.01-0.37) | 0.19<br>(0.00-0.44) | 0.03<br>(0.00-0.28) | 0.06<br>(0.00-0.23) | 0.06<br>(0.00-0.26) | 0.10<br>(0.00-0.22) | 0.19<br>(0.00-0.38) | 0.03<br>(0.00-0.26) | 0.06<br>(0.00-0.26) | 0.06<br>(0.00-0.25) | 0.06<br>(0.00-0.27) | 0.19<br>(0.00-0.38) | 0.03<br>(0.00-0.24) | 0.06<br>(0.00-0.33) |
| Other                                       | 0.05<br>(0.00-0.11) | 0.05<br>(0.00-0.11) | 0.01<br>(0.00-0.08) | 0.02<br>(0.00-0.11) | 0.05<br>(0.00-0.13) | 0.01<br>(0.00-0.10) | 0.05<br>(0.00-0.11) | 0.01<br>(0.00-0.03) | 0.02<br>(0.00-0.06) | 0.05<br>(0.00-0.11) | 0.02<br>(0.00-0.08) | 0.05<br>(0.00-0.11) | 0.01<br>(0.00-0.06) | 0.02<br>(0.00-0.06) |

\*Percent of total disease estimated to be foodborne is taken from Hald et al. (2016) and reported here to provide perspective. Numbers in parentheses are 5<sup>th</sup> and 95<sup>th</sup> percentile values.

|                                             | AFR D                | AFR E                | AMR A                | AMR B                | AMR D                | EMR B                | EMR D                | EUR A                | EUR B                | EUR C                | SEAR B               | SEAR D               | WPR A                | WPR B                |
|---------------------------------------------|----------------------|----------------------|----------------------|----------------------|----------------------|----------------------|----------------------|----------------------|----------------------|----------------------|----------------------|----------------------|----------------------|----------------------|
| <i>Number of Experts</i>                    | 9                    | 11                   | 12                   | 10                   | 5                    | 2                    | 5                    | 20                   | 5                    | 2                    | 3                    | 12                   | 4                    | 3                    |
| <i>Campylobacter spp.</i>                   |                      |                      |                      |                      |                      |                      |                      |                      |                      |                      |                      |                      |                      |                      |
| Percent of total disease that is foodborne* | 0.57<br>(0.31-0.77)  | 0.57<br>(0.29-0.77)  | 0.73<br>(0.38-0.91)  | 0.68<br>(0.41-0.82)  | 0.67<br>(0.37-0.81)  | 0.67<br>(0.38-0.82)  | 0.67<br>(0.41-0.82)  | 0.76<br>(0.44-0.93)  | 0.66<br>(0.34-0.87)  | 0.66<br>(0.34-0.87)  | 0.57<br>(0.27-0.81)  | 0.51<br>(0.03-0.79)  | 0.68<br>(0.40-0.89)  | 0.57<br>(0.25-0.82)  |
| Percent of foodborne disease attributed to: |                      |                      |                      |                      |                      |                      |                      |                      |                      |                      |                      |                      |                      |                      |
| Beef                                        | 0.06<br>(0.00, 0.31) | 0.06<br>(0.00, 0.34) | 0.15<br>(0.00, 0.33) | 0.06<br>(0.00, 0.32) | 0.06<br>(0.00, 0.27) | 0.05<br>(0.00, 0.25) | 0.06<br>(0.00, 0.32) | 0.16<br>(0.00, 0.37) | 0.05<br>(0.00, 0.29) | 0.05<br>(0.00, 0.29) | 0.08<br>(0.00, 0.32) | 0.05<br>(0.00, 0.28) | 0.17<br>(0.00, 0.34) | 0.09<br>(0.00, 0.30) |
| Dairy                                       | 0.13<br>(0.00, 0.33) | 0.14<br>(0.01, 0.32) | 0.07<br>(0.00, 0.38) | 0.12<br>(0.00, 0.30) | 0.13<br>(0.00, 0.31) | 0.10<br>(0.00, 0.25) | 0.13<br>(0.01, 0.31) | 0.07<br>(0.00, 0.27) | 0.15<br>(0.00, 0.32) | 0.14<br>(0.00, 0.31) | 0.15<br>(0.00, 0.41) | 0.13<br>(0.00, 0.40) | 0.04<br>(0.00, 0.23) | 0.13<br>(0.00, 0.30) |
| Fruits and nuts                             | 0.00<br>(0.00, 0.12) | 0.00<br>(0.00, 0.12) | 0.00<br>(0.00, 0.10) | 0.00<br>(0.00, 0.10) | 0.00<br>(0.00, 0.10) | 0.00<br>(0.00, 0.08) | 0.00<br>(0.00, 0.10) | 0.01<br>(0.00, 0.07) | 0.01<br>(0.00, 0.10) | 0.01<br>(0.00, 0.11) | 0.03<br>(0.00, 0.18) | 0.03<br>(0.00, 0.17) | 0.00<br>(0.00, 0.07) | 0.03<br>(0.00, 0.16) |
| Goat, lamb and other small ruminant meats   | 0.10<br>(0.00, 0.28) | 0.10<br>(0.00, 0.29) | 0.04<br>(0.00, 0.18) | 0.10<br>(0.00, 0.26) | 0.09<br>(0.00, 0.27) | 0.08<br>(0.00, 0.26) | 0.11<br>(0.00, 0.32) | 0.04<br>(0.00, 0.17) | 0.07<br>(0.00, 0.28) | 0.07<br>(0.00, 0.28) | 0.14<br>(0.00, 0.37) | 0.11<br>(0.00, 0.33) | 0.05<br>(0.00, 0.20) | 0.07<br>(0.00, 0.29) |
| Pork                                        | 0.00<br>(0.00, 0.17) | 0.00<br>(0.00, 0.19) | 0.04<br>(0.00, 0.21) | 0.00<br>(0.00, 0.26) | 0.00<br>(0.00, 0.25) | 0.00<br>(0.00, 0.05) | 0.00<br>(0.00, 0.08) | 0.06<br>(0.00, 0.25) | 0.08<br>(0.00, 0.24) | 0.08<br>(0.00, 0.24) | 0.14<br>(0.00, 0.38) | 0.16<br>(0.00, 0.36) | 0.04<br>(0.00, 0.24) | 0.13<br>(0.00, 0.34) |
| Poultry meat                                | 0.53<br>(0.25, 0.75) | 0.50<br>(0.21, 0.73) | 0.50<br>(0.21, 0.75) | 0.51<br>(0.23, 0.75) | 0.52<br>(0.22, 0.74) | 0.38<br>(0.16, 0.66) | 0.53<br>(0.22, 0.75) | 0.50<br>(0.22, 0.73) | 0.42<br>(0.20, 0.66) | 0.43<br>(0.20, 0.67) | 0.31<br>(0.03, 0.60) | 0.31<br>(0.05, 0.61) | 0.55<br>(0.24, 0.77) | 0.38<br>(0.15, 0.63) |
| Vegetables                                  | 0.06                 | 0.06                 | 0.05                 | 0.06                 | 0.06                 | 0.33                 | 0.06                 | 0.03                 | 0.09                 | 0.09                 | 0.06                 | 0.05                 | 0.04                 | 0.05                 |

|             |              |              |              |              |              |              |              |              |              |              |              |              |              |              |
|-------------|--------------|--------------|--------------|--------------|--------------|--------------|--------------|--------------|--------------|--------------|--------------|--------------|--------------|--------------|
|             | (0.00, 0.24) | (0.00, 0.24) | (0.00, 0.20) | (0.00, 0.23) | (0.00, 0.23) | (0.03, 0.58) | (0.00, 0.24) | (0.00, 0.21) | (0.00, 0.28) | (0.00, 0.29) | (0.00, 0.23) | (0.00, 0.39) | (0.00, 0.22) | (0.00, 0.28) |
| Other foods | 0.00         | 0.00         | 0.00         | 0.00         | 0.00         | 0.00         | 0.00         | 0.02         | 0.01         | 0.01         | 0.00         | 0.00         | 0.00         | 0.00         |
|             | (0.00, 0.04) | (0.00, 0.04) | (0.00, 0.15) | (0.00, 0.04) | (0.00, 0.06) | (0.00, 0.02) | (0.00, 0.03) | (0.00, 0.15) | (0.00, 0.10) | (0.00, 0.09) | (0.00, 0.03) | (0.00, 0.07) | (0.00, 0.15) | (0.00, 0.03) |

\*Percent of total disease estimated to be foodborne is taken from Hald et al. (2016) and reported here to provide perspective.

|                                             | AFR D                | AFR E                | AMR A                | AMR B                | AMR D                | EMR B                | EMR D                | EUR A                | EUR B                | EUR C                | SEAR B               | SEAR D               | WPR A                | WPR B                |
|---------------------------------------------|----------------------|----------------------|----------------------|----------------------|----------------------|----------------------|----------------------|----------------------|----------------------|----------------------|----------------------|----------------------|----------------------|----------------------|
| <i>Number of Experts</i>                    | 9                    | 11                   | 12                   | 10                   | 5                    | 2                    | 5                    | 20                   | 5                    | 2                    | 3                    | 12                   | 4                    | 3                    |
| <i>Non-typhoidal Salmonella spp.</i>        |                      |                      |                      |                      |                      |                      |                      |                      |                      |                      |                      |                      |                      |                      |
| Percent of total disease that is foodborne* | 0.46<br>(0.13-0.74)  | 0.46<br>(0.10-0.73)  | 0.73<br>(0.38-0.91)  | 0.49<br>(0.09-0.74)  | 0.50<br>(0.14-0.75)  | 0.50<br>(0.18-0.75)  | 0.50<br>(0.19-0.74)  | 0.76<br>(0.47-0.94)  | 0.62<br>(0.31-0.84)  | 0.62<br>(0.32-0.84)  | 0.58<br>(0.23-0.84)  | 0.54<br>(0.00-0.85)  | 0.74<br>(0.45-0.93)  | 0.57<br>(0.25-0.82)  |
| Percent of foodborne disease attributed to: |                      |                      |                      |                      |                      |                      |                      |                      |                      |                      |                      |                      |                      |                      |
| Beef                                        | 0.06<br>(0.00, 0.19) | 0.06<br>(0.00, 0.19) | 0.07<br>(0.00, 0.26) | 0.06<br>(0.00, 0.28) | 0.06<br>(0.00, 0.26) | 0.05<br>(0.00, 0.18) | 0.05<br>(0.00, 0.17) | 0.04<br>(0.00, 0.26) | 0.01<br>(0.00, 0.22) | 0.01<br>(0.00, 0.23) | 0.02<br>(0.00, 0.19) | 0.01<br>(0.00, 0.18) | 0.09<br>(0.00, 0.30) | 0.04<br>(0.00, 0.18) |
| Dairy                                       | 0.05<br>(0.00, 0.19) | 0.05<br>(0.00, 0.19) | 0.05<br>(0.00, 0.24) | 0.05<br>(0.00, 0.17) | 0.05<br>(0.00, 0.18) | 0.06<br>(0.01, 0.19) | 0.06<br>(0.00, 0.16) | 0.02<br>(0.00, 0.19) | 0.02<br>(0.00, 0.20) | 0.02<br>(0.00, 0.20) | 0.05<br>(0.00, 0.21) | 0.06<br>(0.00, 0.29) | 0.04<br>(0.00, 0.20) | 0.04<br>(0.00, 0.19) |
| Eggs                                        | 0.21<br>(0.01, 0.40) | 0.21<br>(0.01, 0.41) | 0.22<br>(0.01, 0.50) | 0.19<br>(0.01, 0.39) | 0.20<br>(0.01, 0.40) | 0.22<br>(0.03, 0.41) | 0.22<br>(0.01, 0.41) | 0.24<br>(0.00, 0.52) | 0.26<br>(0.01, 0.53) | 0.26<br>(0.03, 0.53) | 0.09<br>(0.00, 0.31) | 0.09<br>(0.00, 0.32) | 0.22<br>(0.00, 0.48) | 0.10<br>(0.00, 0.38) |
| Fish                                        | 0.02<br>(0.00, 0.09) | 0.02<br>(0.00, 0.07) | 0.00<br>(0.00, 0.04) | 0.02<br>(0.00, 0.06) | 0.02<br>(0.00, 0.10) | 0.02<br>(0.00, 0.07) | 0.02<br>(0.00, 0.07) | 0.00<br>(0.00, 0.16) | 0.00<br>(0.00, 0.06) | 0.00<br>(0.00, 0.06) | 0.01<br>(0.00, 0.09) | 0.01<br>(0.00, 0.09) | 0.00<br>(0.00, 0.07) | 0.01<br>(0.00, 0.08) |



|             |                 |                 |                 |                 |                 |                 |                 |                 |                 |                 |                 |                 |                 |                 |
|-------------|-----------------|-----------------|-----------------|-----------------|-----------------|-----------------|-----------------|-----------------|-----------------|-----------------|-----------------|-----------------|-----------------|-----------------|
|             | (0.00,<br>0.20) | (0.00,<br>0.20) | (0.00,<br>0.25) | (0.00,<br>0.24) | (0.00,<br>0.25) | (0.00,<br>0.19) | (0.00,<br>0.19) | (0.00,<br>0.23) | (0.00,<br>0.28) | (0.00,<br>0.28) | (0.00,<br>0.25) | (0.00,<br>0.29) | (0.00,<br>0.23) | (0.00,<br>0.27) |
| Other foods | 0.00            | 0.00            | 0.00            | 0.00            | 0.00            | 0.00            | 0.00            | 0.00            | 0.00            | 0.00            | 0.00            | 0.00            | 0.00            | 0.00            |
|             | (0.00,<br>0.08) | (0.00,<br>0.01) | (0.00,<br>0.08) | (0.00,<br>0.01) | (0.00,<br>0.01) | (0.00,<br>0.01) | (0.00,<br>0.01) | (0.00,<br>0.08) | (0.00,<br>0.03) | (0.00,<br>0.03) | (0.00,<br>0.01) | (0.00,<br>0.01) | (0.00,<br>0.08) | (0.00,<br>0.04) |

\*Percent of total disease estimated to be foodborne is taken from Hald et al. (2016) and reported here to provide perspective. Numbers in parentheses are 5<sup>th</sup> and 95<sup>th</sup> percentile values.

|                                                      | AFR D               | AFR E               | AMR A               | AMR B               | AMR D               | EMR B               | EMR D               | EUR A               | EUR B               | EUR C               | SEAR B              | SEAR D              | WPR A               | WPR B               |
|------------------------------------------------------|---------------------|---------------------|---------------------|---------------------|---------------------|---------------------|---------------------|---------------------|---------------------|---------------------|---------------------|---------------------|---------------------|---------------------|
| Shiga toxin-producing <i>Escherichia coli</i> (STEC) |                     |                     |                     |                     |                     |                     |                     |                     |                     |                     |                     |                     |                     |                     |
| Percent of total disease that is foodborne           | 0.42<br>(0.19-0.66) | 0.43<br>(0.14-0.66) | 0.59<br>(0.19-0.84) | 0.53<br>(0.24-0.73) | 0.53<br>(0.24-0.75) | 0.53<br>(0.24-0.76) | 0.52<br>(0.26-0.75) | 0.60<br>(0.26-0.83) | 0.49<br>(0.15-0.75) | 0.49<br>(0.15-0.75) | 0.41<br>(0.10-0.70) | 0.40<br>(0.08-0.71) | 0.57<br>(0.25-0.82) | 0.43<br>(0.12-0.73) |
| Percent of foodborne disease attributed to:          |                     |                     |                     |                     |                     |                     |                     |                     |                     |                     |                     |                     |                     |                     |
| Beef                                                 | 0.40<br>(0.09-0.65) | 0.41<br>(0.09-0.66) | 0.54<br>(0.29-0.77) | 0.47<br>(0.20-0.69) | 0.48<br>(0.20-0.69) | 0.42<br>(0.11-0.66) | 0.42<br>(0.13-0.67) | 0.42<br>(0.17-0.67) | 0.47<br>(0.18-0.68) | 0.47<br>(0.18-0.68) | 0.08<br>(0.00-0.43) | 0.07<br>(0.00-0.41) | 0.44<br>(0.19-0.70) | 0.20<br>(0.01-0.51) |
| Dairy                                                | 0.14<br>(0.00-0.34) | 0.14<br>(0.00-0.33) | 0.13<br>(0.00-0.31) | 0.13<br>(0.00-0.30) | 0.13<br>(0.00-0.32) | 0.14<br>(0.00-0.35) | 0.14<br>(0.00-0.35) | 0.17<br>(0.01-0.37) | 0.17<br>(0.00-0.35) | 0.17<br>(0.00-0.35) | 0.14<br>(0.00-0.46) | 0.14<br>(0.00-0.44) | 0.14<br>(0.00-0.34) | 0.14<br>(0.00-0.35) |
| Fruits                                               | 0.05<br>(0.00-0.24) | 0.05<br>(0.00-0.22) | 0.02<br>(0.00-0.20) | 0.05<br>(0.00-0.21) | 0.05<br>(0.00-0.21) | 0.05<br>(0.00-0.22) | 0.05<br>(0.00-0.22) | 0.02<br>(0.00-0.18) | 0.01<br>(0.00-0.21) | 0.01<br>(0.00-0.21) | 0.12<br>(0.00-0.38) | 0.11<br>(0.00-0.33) | 0.01<br>(0.00-0.13) | 0.09<br>(0.00-0.33) |
| Goat, Lamb and other small ruminant meats            | 0.23<br>(0.01-0.48) | 0.22<br>(0.02-0.44) | 0.07<br>(0.00-0.24) | 0.14<br>(0.00-0.35) | 0.14<br>(0.00-0.35) | 0.24<br>(0.00-0.49) | 0.24<br>(0.00-0.49) | 0.08<br>(0.00-0.29) | 0.06<br>(0.00-0.30) | 0.06<br>(0.00-0.32) | 0.26<br>(0.01-0.59) | 0.26<br>(0.01-0.59) | 0.17<br>(0.00-0.36) | 0.20<br>(0.00-0.46) |
| Vegetables                                           | 0.09<br>(0.00-0.29) | 0.09<br>(0.00-0.29) | 0.17<br>(0.00-0.41) | 0.14<br>(0.01-0.33) | 0.14<br>(0.00-0.34) | 0.09<br>(0.00-0.32) | 0.09<br>(0.00-0.31) | 0.14<br>(0.01-0.37) | 0.14<br>(0.00-0.38) | 0.14<br>(0.00-0.39) | 0.12<br>(0.00-0.40) | 0.13<br>(0.00-0.45) | 0.12<br>(0.00-0.42) | 0.11<br>(0.00-0.44) |
| Other                                                | 0.00<br>(0.00-0.12) | 0.00<br>(0.00-0.11) | 0.00<br>(0.00-0.12) | 0.00<br>(0.00-0.10) | 0.00<br>(0.00-0.10) | 0.00<br>(0.00-0.12) | 0.00<br>(0.00-0.12) | 0.00<br>(0.00-0.14) | 0.00<br>(0.00-0.09) | 0.00<br>(0.00-0.10) | 0.00<br>(0.00-0.11) | 0.00<br>(0.00-0.10) | 0.00<br>(0.00-0.10) | 0.00<br>(0.00-0.08) |

\*Percent of total disease estimated to be foodborne is taken from Hald et al. (2016) and reported here to provide perspective. Numbers in parentheses are 5<sup>th</sup> and 95<sup>th</sup> percentile values.

|                                             | AFR D               | AFR E               | AMR A               | AMR B               | AMR D               | EMR B               | EMR D               | EUR A               | EUR B               | EUR C               | SEAR B              | SEAR D              | WPR A               | WPR B               |
|---------------------------------------------|---------------------|---------------------|---------------------|---------------------|---------------------|---------------------|---------------------|---------------------|---------------------|---------------------|---------------------|---------------------|---------------------|---------------------|
| <i>Toxoplasma gondii</i>                    |                     |                     |                     |                     |                     |                     |                     |                     |                     |                     |                     |                     |                     |                     |
| Percent of total disease that is foodborne* | 0.48<br>(0.24-0.76) | 0.42<br>(0.20-0.70) | 0.60<br>(0.30-0.81) | 0.52<br>(0.27-0.77) | 0.53<br>(0.27-0.77) | 0.52<br>(0.27-0.80) | 0.53<br>(0.29-0.77) | 0.61<br>(0.35-0.82) | 0.45<br>(0.23-0.76) | 0.53<br>(0.31-0.78) | 0.52<br>(0.26-0.77) | 0.43<br>(0.09-0.73) | 0.60<br>(0.33-0.81) | 0.53<br>(0.29-0.77) |
| Percent of foodborne disease attributed to: |                     |                     |                     |                     |                     |                     |                     |                     |                     |                     |                     |                     |                     |                     |
| Beef                                        | 0.31<br>(0.03-0.61) | 0.33<br>(0.07-0.60) | 0.34<br>(0.08-0.58) | 0.27<br>(0.01-0.55) | 0.33<br>(0.00-0.60) | 0.20<br>(0.03-0.39) | 0.18<br>(0.03-0.37) | 0.25<br>(0.00-0.51) | 0.38<br>(0.08-0.62) | 0.25<br>(0.00-0.54) | 0.23<br>(0.06-0.45) | 0.19<br>(0.04-0.37) | 0.30<br>(0.09-0.55) | 0.26<br>(0.06-0.47) |
| Dairy                                       | 0.00<br>(0.00-0.31) | 0.00<br>(0.00-0.16) | 0.00<br>(0.00-0.13) | 0.00<br>(0.00-0.14) | 0.00<br>(0.00-0.13) | 0.00<br>(0.00-0.12) | 0.00<br>(0.00-0.18) | 0.00<br>(0.00-0.12) | 0.00<br>(0.00-0.13) | 0.00<br>(0.00-0.13) | 0.00<br>(0.00-0.13) | 0.00<br>(0.00-0.12) | 0.00<br>(0.00-0.14) | 0.00<br>(0.00-0.11) |
| Eggs                                        | 0.00<br>(0.00-0.03) | 0.00<br>(0.00-0.02) | 0.00<br>(0.00-0.02) | 0.00<br>(0.00-0.02) | 0.00<br>(0.00-0.02) | 0.00<br>(0.00-0.03) | 0.00<br>(0.00-0.03) | 0.00<br>(0.00-0.02) | 0.00<br>(0.00-0.02) | 0.00<br>(0.00-0.02) | 0.00<br>(0.00-0.02) | 0.00<br>(0.00-0.03) | 0.00<br>(0.00-0.03) | 0.00<br>(0.00-0.02) |
| Fruits                                      | 0.03<br>(0.00-0.18) | 0.03<br>(0.00-0.16) | 0.02<br>(0.00-0.17) | 0.02<br>(0.00-0.14) | 0.02<br>(0.00-0.15) | 0.03<br>(0.00-0.16) | 0.03<br>(0.00-0.17) | 0.07<br>(0.00-0.22) | 0.04<br>(0.00-0.13) | 0.04<br>(0.00-0.14) | 0.04<br>(0.00-0.19) | 0.03<br>(0.00-0.19) | 0.03<br>(0.00-0.14) | 0.03<br>(0.00-0.17) |
| Goat, Lamb and other small ruminant meats   | 0.28<br>(0.05-0.61) | 0.18<br>(0.02-0.45) | 0.12<br>(0.00-0.33) | 0.10<br>(0.00-0.41) | 0.08<br>(0.00-0.38) | 0.42<br>(0.12-0.65) | 0.44<br>(0.14-0.69) | 0.11<br>(0.00-0.42) | 0.09<br>(0.01-0.37) | 0.18<br>(0.03-0.48) | 0.19<br>(0.02-0.46) | 0.16<br>(0.01-0.47) | 0.14<br>(0.00-0.43) | 0.18<br>(0.01-0.47) |
| Pork                                        | 0.06<br>(0.00-0.34) | 0.13<br>(0.00-0.41) | 0.16<br>(0.00-0.50) | 0.22<br>(0.01-0.54) | 0.22<br>(0.02-0.52) | 0.02<br>(0.00-0.30) | 0.02<br>(0.00-0.31) | 0.20<br>(0.02-0.51) | 0.12<br>(0.00-0.49) | 0.12<br>(0.00-0.50) | 0.17<br>(0.00-0.41) | 0.15<br>(0.00-0.44) | 0.12<br>(0.00-0.49) | 0.14<br>(0.00-0.41) |
| Poultry meat                                | 0.05<br>(0.00-0.32) | 0.06<br>(0.00-0.34) | 0.08<br>(0.00-0.34) | 0.07<br>(0.00-0.34) | 0.07<br>(0.00-0.34) | 0.07<br>(0.00-0.33) | 0.00<br>(0.00-0.34) | 0.09<br>(0.00-0.35) | 0.07<br>(0.00-0.35) | 0.07<br>(0.00-0.32) | 0.09<br>(0.00-0.36) | 0.14<br>(0.00-0.38) | 0.11<br>(0.00-0.40) | 0.14<br>(0.00-0.39) |
| Vegetables                                  | 0.14<br>(0.00-0.39) | 0.16<br>(0.00-0.37) | 0.15<br>(0.00-0.44) | 0.19<br>(0.00-0.46) | 0.17<br>(0.00-0.45) | 0.21<br>(0.00-0.41) | 0.23<br>(0.00-0.47) | 0.17<br>(0.00-0.41) | 0.18<br>(0.00-0.40) | 0.21<br>(0.01-0.47) | 0.21<br>(0.00-0.42) | 0.22<br>(0.00-0.46) | 0.15<br>(0.00-0.39) | 0.15<br>(0.00-0.36) |

|       |        |        |        |        |        |        |        |        |        |        |        |        |        |        |
|-------|--------|--------|--------|--------|--------|--------|--------|--------|--------|--------|--------|--------|--------|--------|
| Other | 0.00   | 0.00   | 0.00   | 0.00   | 0.00   | 0.00   | 0.00   | 0.00   | 0.00   | 0.00   | 0.00   | 0.02   | 0.00   | 0.00   |
|       | (0.00- | (0.00- | (0.00- | (0.00- | (0.00- | (0.00- | (0.00- | (0.00- | (0.00- | (0.00- | (0.00- | (0.00- | (0.00- | (0.00- |
|       | 0.14)  | 0.12)  | 0.13)  | 0.14)  | 0.12)  | 0.14)  | 0.14)  | 0.13)  | 0.14)  | 0.12)  | 0.13)  | 0.14)  | 0.12)  | 0.12)  |

\*Percent of total disease estimated to be foodborne is taken from Hald et al. (2016) and reported here to provide perspective. Numbers in parentheses are 5<sup>th</sup> and 95<sup>th</sup> percentile values.
