# Supplementary material for: Attribution of global foodborne disease to specific foods: Findings from a World Health Organization structured expert elicitation
Source: PLoS One. 2017 Sep 14;12(9):e0183641. doi: 10.1371/journal.pone.0183641 (PMC5598938; doi:10.1371/journal.pone.0183641)
Supplement: S4 File — Data file including anonymized responses from all experts on food source attribution for the WHO FERG expert elicitation. (XLSX) [file pone.0183641.s006.xlsx]

## Sheet: Read Me
			This file contains anonymized data that was used in estimating results presented in:
			Hoffmann et al., Attribution of global foodborne disease to specific foods: Findings from a World Health Organization structured expert elicitation
			Published in PLosOne fall 2017.

## Sheet: List of experts
Name*		*Experts are listed in alphabetical order.
Ahmad R. Sharif		The line numbers beside experts names do not correspond to the anonymized identification numbers for experts in other sheets in this workbook.
Albert Bosch
Alejandro Cravioto
André Ravel
Annemarie Käsbohrer
Ayachi Ammar
Boris Igor pavlin
Brecht Devleesschauwer
Brent Dixon
Catterina Ferreccio
Celia Holland
Ciara O'Reilly
David Rein
Eratus K. Kang'ethe
Fidel Angel Nuñez
Gabriel Adegoke
Geraldine Duffy
Goutam Kumar Adak
Hannah Gould
Henriette de Valk
Heriberto Fernandez
Ihab Habib
Irma Rivera
Ivar Vågsholm
Jacques Godfroid
Jeff Farber
Jennie Musto
Jjitra Waikagul
Joke van der Giessen
Jorge Enrique Bolpe
Jorge Enrique Gomez-Marin
Karen H. Keddy
Kathryn H. Jacobsen
Keeve E. Nachman
Linda Verhoef
Luca Busani
Lucy Robertson
Mahmudur Rahman
Malco W. Kennedy
Melita Gordon
Mey Jurdi
Michael Gilsdorf
Mohmmad Bogher Rokni
Nilanthi da Silva
Olgica Djurkovic-Djakovic
Panin Alexander
Patrizia Rossi
Paul Cook
Philip M. Bolger
Rabih Kamleh
Radu Blaga
Rashidul Haque
Richard Deckelbaum
Ronald Fayer
Rungtip Chuanchuen
Salah Al Awaidy
Saleem Kamili
Samson Mukaratirwa
Samuel Kariuki
Sara M. Pires
Sarah O'Brien
Sava Buncic
Shua J. Chai
Subhash C. Parija
Tandavarayan Ramamurthy
Tomoyashi Nozaki
Una Ryan
Vladimir P. do Nascimento
Wael M. Latfy
Waraluk Tangkanakul
Ynes R. Ortega
Yvonne van Duynhoven

## Sheet: Ascaris
Ascaris spp.
Expert ID	Region	Food category	5th percentile	50th percentile	95th percentile
58	AFR D	Vegetables (excluding dried legumes)	0.3	0.5	0.7		This file contains anonymized data that was used in estimating results presented in:
58	AFR D	Fruits and Nuts	0.3	0.5	0.7
58	AFR D	Other foods	0	0	0		Hoffmann et al., Estimates of the relative role of specific food categories in causing major foodborne enteric
58	AFR E	Vegetables (excluding dried legumes)	0.3	0.5	0.7		diseases around the world: Findings from a World Health Organization structured expert elicitation.
58	AFR E	Fruits and Nuts	0.3	0.5	0.7		PlosOne ___date___ and url.
58	AFR E	Other foods	0	0	0
58	AMR A	Vegetables (excluding dried legumes)	0.5	0.7	0.8
58	AMR A	Fruits and Nuts	0.2	0.3	0.5
58	AMR A	Other foods	0	0	0
58	AMR B	Vegetables (excluding dried legumes)	0.3	0.5	0.7
58	AMR B	Fruits and Nuts	0.3	0.5	0.7
58	AMR B	Other foods	0	0	0
58	AMR D	Vegetables (excluding dried legumes)	0.3	0.5	0.7
58	AMR D	Fruits and Nuts	0.3	0.5	0.7
58	AMR D	Other foods	0	0	0
58	EUR A	Vegetables (excluding dried legumes)	0.5	0.7	0.8
58	EUR A	Fruits and Nuts	0.2	0.3	0.5
58	EUR A	Other foods	0	0	0
58	EUR B	Vegetables (excluding dried legumes)	0.5	0.7	0.8
58	EUR B	Fruits and Nuts	0.2	0.3	0.5
58	EUR B	Other foods	0	0	0
58	EUR C	Vegetables (excluding dried legumes)	0.5	0.7	0.8
58	EUR C	Fruits and Nuts	0.2	0.3	0.5
58	EUR C	Other foods	0	0	0
58	EMR B	Vegetables (excluding dried legumes)	0.5	0.7	0.8
58	EMR B	Fruits and Nuts	0.2	0.3	0.5
58	EMR B	Other foods	0	0	0
58	EMR D	Vegetables (excluding dried legumes)	0.3	0.5	0.7
58	EMR D	Fruits and Nuts	0.3	0.5	0.7
58	EMR D	Other foods	0	0	0
58	SEAR B	Vegetables (excluding dried legumes)	0.3	0.5	0.7
58	SEAR B	Fruits and Nuts	0.3	0.5	0.7
58	SEAR B	Other foods	0	0	0
58	SEAR D	Vegetables (excluding dried legumes)	0.3	0.5	0.7
58	SEAR D	Fruits and Nuts	0.3	0.5	0.7
58	SEAR D	Other foods	0	0	0
58	WPR A	Vegetables (excluding dried legumes)	0.5	0.7	0.8
58	WPR A	Fruits and Nuts	0.2	0.3	0.5
58	WPR A	Other foods	0	0	0
58	WPR B	Vegetables (excluding dried legumes)	0.5	0.7	0.8
58	WPR B	Fruits and Nuts	0.2	0.3	0.5
58	WPR B	Other foods	0	0	0
90	AFR D	Vegetables (excluding dried legumes)	0.6	0.8	0.95
90	AFR D	Fruits and Nuts	0.05	0.2	0.4
90	AFR D	Other foods	0	0	0
90	AFR E	Vegetables (excluding dried legumes)	0.6	0.8	0.95
90	AFR E	Fruits and Nuts	0.05	0.2	0.4
90	AFR E	Other foods	0	0	0
90	AMR A	Vegetables (excluding dried legumes)	0.9	0.95	1
90	AMR A	Fruits and Nuts	0	0.05	0.1
90	AMR A	Other foods	0	0	0
90	AMR B	Vegetables (excluding dried legumes)	0.9	0.95	1
90	AMR B	Fruits and Nuts	0	0.05	0.1
90	AMR B	Other foods	0	0	0
90	AMR D	Vegetables (excluding dried legumes)	0.6	0.8	0.95
90	AMR D	Fruits and Nuts	0.05	0.2	0.4
90	AMR D	Other foods	0	0	0
90	EUR A	Vegetables (excluding dried legumes)	0.9	0.95	1
90	EUR A	Fruits and Nuts	0	0.05	0.1
90	EUR A	Other foods	0	0	0
90	EUR B	Vegetables (excluding dried legumes)	0.9	0.95	1
90	EUR B	Fruits and Nuts	0	0.05	0.1
90	EUR B	Other foods	0	0	0
90	EUR C	Vegetables (excluding dried legumes)	0.6	0.8	0.95
90	EUR C	Fruits and Nuts	0.05	0.2	0.4
90	EUR C	Other foods	0	0	0
90	EMR B	Vegetables (excluding dried legumes)	0.9	0.95	1
90	EMR B	Fruits and Nuts	0	0.05	0.1
90	EMR B	Other foods	0	0	0
90	EMR D	Vegetables (excluding dried legumes)	0.6	0.8	0.95
90	EMR D	Fruits and Nuts	0.05	0.2	0.4
90	EMR D	Other foods	0	0	0
90	SEAR B	Vegetables (excluding dried legumes)	0.9	0.95	1
90	SEAR B	Fruits and Nuts	0	0.05	0.1
90	SEAR B	Other foods	0	0	0
90	SEAR D	Vegetables (excluding dried legumes)	0.6	0.8	0.95
90	SEAR D	Fruits and Nuts	0.05	0.2	0.4
90	SEAR D	Other foods	0	0	0
90	WPR A	Vegetables (excluding dried legumes)	0.9	0.95	1
90	WPR A	Fruits and Nuts	0	0.05	0.1
90	WPR A	Other foods	0	0	0
90	WPR B	Vegetables (excluding dried legumes)	0.9	0.95	1
90	WPR B	Fruits and Nuts	0	0.05	0.1
90	WPR B	Other foods	0	0	0
120	AFR D	Vegetables (excluding dried legumes)	0.3	0.45	0.7
120	AFR D	Fruits and Nuts	0.25	0.4	0.65
120	AFR D	Other foods	0.07	0.15	0.25
120	AFR E	Vegetables (excluding dried legumes)	0.3	0.45	0.7
120	AFR E	Fruits and Nuts	0.25	0.4	0.65
120	AFR E	Other foods	0.07	0.15	0.25
120	AMR A	Vegetables (excluding dried legumes)	0.3	0.45	0.7
120	AMR A	Fruits and Nuts	0.25	0.4	0.65
120	AMR A	Other foods	0.07	0.15	0.25
120	AMR B	Vegetables (excluding dried legumes)	0.3	0.45	0.7
120	AMR B	Fruits and Nuts	0.25	0.4	0.65
120	AMR B	Other foods	0.07	0.15	0.25
120	AMR D	Vegetables (excluding dried legumes)	0.3	0.45	0.7
120	AMR D	Fruits and Nuts	0.25	0.4	0.65
120	AMR D	Other foods	0.07	0.15	0.25
120	EUR A	Vegetables (excluding dried legumes)	0.3	0.45	0.7
120	EUR A	Fruits and Nuts	0.25	0.4	0.65
120	EUR A	Other foods	0.07	0.15	0.25
120	EUR B	Vegetables (excluding dried legumes)	0.3	0.45	0.7
120	EUR B	Fruits and Nuts	0.25	0.4	0.65
120	EUR B	Other foods	0.07	0.15	0.25
120	EUR C	Vegetables (excluding dried legumes)	0.3	0.45	0.7
120	EUR C	Fruits and Nuts	0.25	0.4	0.65
120	EUR C	Other foods	0.07	0.15	0.25
120	EMR B	Vegetables (excluding dried legumes)	0.3	0.45	0.7
120	EMR B	Fruits and Nuts	0.25	0.4	0.65
120	EMR B	Other foods	0.07	0.15	0.25
120	EMR D	Vegetables (excluding dried legumes)	0.3	0.45	0.7
120	EMR D	Fruits and Nuts	0.25	0.4	0.65
120	EMR D	Other foods	0.07	0.15	0.25
120	SEAR B	Vegetables (excluding dried legumes)	0.3	0.45	0.7
120	SEAR B	Fruits and Nuts	0.25	0.4	0.65
120	SEAR B	Other foods	0.07	0.15	0.25
120	SEAR D	Vegetables (excluding dried legumes)	0.3	0.45	0.7
120	SEAR D	Fruits and Nuts	0.25	0.4	0.65
120	SEAR D	Other foods	0.07	0.15	0.25
120	WPR A	Vegetables (excluding dried legumes)	0.3	0.45	0.7
120	WPR A	Fruits and Nuts	0.25	0.4	0.65
120	WPR A	Other foods	0.07	0.15	0.25
120	WPR B	Vegetables (excluding dried legumes)	0.3	0.45	0.7
120	WPR B	Fruits and Nuts	0.25	0.4	0.65
120	WPR B	Other foods	0.07	0.15	0.25
213	AFR D	Vegetables (excluding dried legumes)	0.8	1	1.2
213	AFR D	Fruits and Nuts	0	0	0
213	AFR D	Other foods	0	0	0
213	AFR E	Vegetables (excluding dried legumes)	0.8	1	1.2
213	AFR E	Fruits and Nuts	0	0	0
213	AFR E	Other foods	0	0	0
213	AMR A	Vegetables (excluding dried legumes)	0.7	0.95	1.2
213	AMR A	Fruits and Nuts	0.01	0.05	0.07
213	AMR A	Other foods	0	0	0
213	AMR B	Vegetables (excluding dried legumes)	0.8	1	1.2
213	AMR B	Fruits and Nuts	0	0	0
213	AMR B	Other foods	0	0	0
213	AMR D	Vegetables (excluding dried legumes)	0.8	1	1.2
213	AMR D	Fruits and Nuts	0	0	0
213	AMR D	Other foods	0	0	0
213	EUR A	Vegetables (excluding dried legumes)	0.7	0.95	1.2
213	EUR A	Fruits and Nuts	0.01	0.05	0.07
213	EUR A	Other foods	0	0	0
213	EUR B	Vegetables (excluding dried legumes)	0.7	0.9	1.2
213	EUR B	Fruits and Nuts	0.02	0.1	0.15
213	EUR B	Other foods	0	0	0
213	EUR C	Vegetables (excluding dried legumes)	0.6	0.8	1
213	EUR C	Fruits and Nuts	0.1	0.2	0.3
213	EUR C	Other foods	0	0	0
213	EMR B	Vegetables (excluding dried legumes)	0.8	1	1.2
213	EMR B	Fruits and Nuts	0	0	0
213	EMR B	Other foods	0	0	0
213	EMR D	Vegetables (excluding dried legumes)	0.8	1	1.2
213	EMR D	Fruits and Nuts	0	0	0
213	EMR D	Other foods	0	0	0
213	SEAR B	Vegetables (excluding dried legumes)	0.8	1	1.2
213	SEAR B	Fruits and Nuts	0	0	0
213	SEAR B	Other foods	0	0	0
213	SEAR D	Vegetables (excluding dried legumes)	0.8	1	1.2
213	SEAR D	Fruits and Nuts	0	0	0
213	SEAR D	Other foods	0	0	0
213	WPR A	Vegetables (excluding dried legumes)	0.6	0.85	1
213	WPR A	Fruits and Nuts	0.05	0.15	0.2
213	WPR A	Other foods	0	0	0
213	WPR B	Vegetables (excluding dried legumes)	0.8	1	1.2
213	WPR B	Fruits and Nuts	0	0	0
213	WPR B	Other foods	0	0	0
232	AFR D	Vegetables (excluding dried legumes)	0.6	0.8	0.9
232	AFR D	Fruits and Nuts	0.05	0.1	0.15
232	AFR D	Other foods	0.05	0.1	0.15
232	AFR E	Vegetables (excluding dried legumes)	0.55	0.77	0.85
232	AFR E	Fruits and Nuts	0.05	0.13	0.18
232	AFR E	Other foods	0.05	0.1	0.15
232	AMR A	Vegetables (excluding dried legumes)	0.5	0.7	0.8
232	AMR A	Fruits and Nuts	0.05	0.2	0.25
232	AMR A	Other foods	0.05	0.1	0.15
232	AMR B	Vegetables (excluding dried legumes)	0.6	0.8	0.9
232	AMR B	Fruits and Nuts	0.05	0.1	0.15
232	AMR B	Other foods	0.05	0.1	0.15
232	AMR D	Vegetables (excluding dried legumes)	0.6	0.8	0.92
232	AMR D	Fruits and Nuts	0.1	0.12	0.2
232	AMR D	Other foods	0.05	0.08	0.12
232	EUR A	Vegetables (excluding dried legumes)	0.57	0.75	0.87
232	EUR A	Fruits and Nuts	0.1	0.2	0.25
232	EUR A	Other foods	0.03	0.05	0.08
232	EUR B	Vegetables (excluding dried legumes)	0.55	0.85	0.9
232	EUR B	Fruits and Nuts	0.07	0.1	0.15
232	EUR B	Other foods	0.02	0.05	0.1
232	EUR C	Vegetables (excluding dried legumes)	0.55	0.78	0.88
232	EUR C	Fruits and Nuts	0.1	0.12	0.15
232	EUR C	Other foods	0.07	0.1	0.12
232	EMR B	Vegetables (excluding dried legumes)	0.6	0.82	0.85
232	EMR B	Fruits and Nuts	0.06	0.08	0.15
232	EMR B	Other foods	0.05	0.1	0.15
232	EMR D	Vegetables (excluding dried legumes)	0.6	0.78	0.85
232	EMR D	Fruits and Nuts	0.08	0.1	0.15
232	EMR D	Other foods	0.05	0.12	0.15
232	SEAR B	Vegetables (excluding dried legumes)	0.6	0.75	0.85
232	SEAR B	Fruits and Nuts	0.08	0.1	0.15
232	SEAR B	Other foods	0.12	0.15	0.2
232	SEAR D	Vegetables (excluding dried legumes)	0.65	0.78	0.85
232	SEAR D	Fruits and Nuts	0.06	0.07	0.15
232	SEAR D	Other foods	0.12	0.15	0.2
232	WPR A	Vegetables (excluding dried legumes)	0.6	0.8	0.9
232	WPR A	Fruits and Nuts	0.05	0.1	0.15
232	WPR A	Other foods	0.05	0.1	0.15
232	WPR B	Vegetables (excluding dried legumes)	0.6	0.8	0.9
232	WPR B	Fruits and Nuts	0.05	0.08	0.12
232	WPR B	Other foods	0.05	0.12	0.15
244	AFR D	Vegetables (excluding dried legumes)	0.5	0.68	0.85
244	AFR D	Fruits and Nuts	0.15	0.25	0.3
244	AFR D	Other foods	0.02	0.07	0.1
244	AFR E	Vegetables (excluding dried legumes)	0.55	0.65	0.8
244	AFR E	Fruits and Nuts	0.15	0.25	0.3
244	AFR E	Other foods	0.05	0.1	0.12
244	AMR A	Vegetables (excluding dried legumes)	0.4	0.5	0.75
244	AMR A	Fruits and Nuts	0.25	0.48	0.6
244	AMR A	Other foods	0.01	0.02	0.05
244	AMR B	Vegetables (excluding dried legumes)	0.35	0.55	0.6
244	AMR B	Fruits and Nuts	0.23	0.4	0.5
244	AMR B	Other foods	0.03	0.05	0.1
244	AMR D	Vegetables (excluding dried legumes)	0.5	0.58	0.75
244	AMR D	Fruits and Nuts	0.25	0.35	0.4
244	AMR D	Other foods	0.03	0.07	0.15
244	EUR A	Vegetables (excluding dried legumes)	0.5	0.72	0.89
244	EUR A	Fruits and Nuts	0.1	0.25	0.35
244	EUR A	Other foods	0.01	0.03	0.07
244	EUR B	Vegetables (excluding dried legumes)	0.5	0.69	0.77
244	EUR B	Fruits and Nuts	0.15	0.26	0.39
244	EUR B	Other foods	0.03	0.05	0.2
244	EUR C	Vegetables (excluding dried legumes)	0.55	0.65	0.8
244	EUR C	Fruits and Nuts	0.2	0.3	0.37
244	EUR C	Other foods	0.02	0.05	0.18
244	EMR B	Vegetables (excluding dried legumes)	0.36	0.47	0.52
244	EMR B	Fruits and Nuts	0.3	0.48	0.55
244	EMR B	Other foods	0.03	0.05	0.1
244	EMR D	Vegetables (excluding dried legumes)	0.35	0.49	0.6
244	EMR D	Fruits and Nuts	0.3	0.46	0.6
244	EMR D	Other foods	0.02	0.05	0.15
244	SEAR B	Vegetables (excluding dried legumes)	0.5	0.75	0.8
244	SEAR B	Fruits and Nuts	0.08	0.22	0.25
244	SEAR B	Other foods	0.01	0.03	0.07
244	SEAR D	Vegetables (excluding dried legumes)	0.45	0.5	0.65
244	SEAR D	Fruits and Nuts	0.37	0.48	0.55
244	SEAR D	Other foods	0.01	0.02	0.05
244	WPR A	Vegetables (excluding dried legumes)	0.35	0.75	0.89
244	WPR A	Fruits and Nuts	0.18	0.23	0.3
244	WPR A	Other foods	0.01	0.02	0.05
244	WPR B	Vegetables (excluding dried legumes)	0.4	0.53	0.72
244	WPR B	Fruits and Nuts	0.27	0.4	0.56
244	WPR B	Other foods	0.03	0.07	0.12
272	AFR D	Vegetables (excluding dried legumes)	0.3	0.7	0.9
272	AFR D	Fruits and Nuts	0.1	0.2	0.4
272	AFR D	Other foods	0.03	0.1	0.2
272	AFR E	Vegetables (excluding dried legumes)	0.25	0.65	0.9
272	AFR E	Fruits and Nuts	0.12	0.25	0.42
272	AFR E	Other foods	0.03	0.1	0.2
272	AMR A	Vegetables (excluding dried legumes)	0.4	0.85	0.95
272	AMR A	Fruits and Nuts	0.05	0.15	0.25
272	AMR A	Other foods	0	0	0.01
272	AMR B	Vegetables (excluding dried legumes)	0.35	0.65	0.8
272	AMR B	Fruits and Nuts	0.15	0.3	0.5
272	AMR B	Other foods	0.02	0.05	0.1
272	AMR D	Vegetables (excluding dried legumes)	0.35	0.7	0.85
272	AMR D	Fruits and Nuts	0.1	0.2	0.35
272	AMR D	Other foods	0.05	0.1	0.15
272	EUR A	Vegetables (excluding dried legumes)	0.3	0.8	0.95
272	EUR A	Fruits and Nuts	0.1	0.2	0.4
272	EUR A	Other foods	0	0	0.01
272	EUR B	Vegetables (excluding dried legumes)	0.25	0.75	0.9
272	EUR B	Fruits and Nuts	0.1	0.25	0.4
272	EUR B	Other foods	0	0	0.01
272	EUR C	Vegetables (excluding dried legumes)	0.25	0.7	0.9
272	EUR C	Fruits and Nuts	0.1	0.25	0.4
272	EUR C	Other foods	0.02	0.05	0.07
272	EMR B	Vegetables (excluding dried legumes)	0.4	0.6	0.8
272	EMR B	Fruits and Nuts	0.15	0.3	0.45
272	EMR B	Other foods	0.05	0.1	0.2
272	EMR D	Vegetables (excluding dried legumes)	0.3	0.5	0.75
272	EMR D	Fruits and Nuts	0.15	0.4	0.6
272	EMR D	Other foods	0.05	0.1	0.2
272	SEAR B	Vegetables (excluding dried legumes)	0.2	0.5	0.8
272	SEAR B	Fruits and Nuts	0.15	0.45	0.6
272	SEAR B	Other foods	0.02	0.05	0.1
272	SEAR D	Vegetables (excluding dried legumes)	0.3	0.6	0.8
272	SEAR D	Fruits and Nuts	0.2	0.3	0.5
272	SEAR D	Other foods	0.05	0.1	0.2
272	WPR A	Vegetables (excluding dried legumes)	0.1	0.7	0.9
272	WPR A	Fruits and Nuts	0.1	0.3	0.5
272	WPR A	Other foods	0	0	0.01
272	WPR B	Vegetables (excluding dried legumes)	0.2	0.6	0.75
272	WPR B	Fruits and Nuts	0.15	0.35	0.5
272	WPR B	Other foods	0.02	0.05	0.1

## Sheet: Brucella
Brucellaspp.
Expert ID	Region	Food category	5th percentile	50th percentile	95th percentile
38	AFR D	Beef	20	25	32		This file contains anonymized data that was used in estimating results presented in:
38	AFR D	Goat, lamb and other small ruminants' meat	25	30	32
38	AFR D	Dairy (milk and milk products)	25	30	45		Hoffmann et al., Estimates of the relative role of specific food categories in causing major foodborne enteric
38	AFR D	Pork	4	5	6		diseases around the world: Findings from a World Health Organization structured expert elicitation.
38	AFR D	Other	2	3	4		PlosOne ___date___ and url.
38	AFR E	Beef	-	-	-
38	AFR E	Goat, lamb and other small ruminants' meat	-	-	-
38	AFR E	Dairy (milk and milk products)	-	-	-
38	AFR E	Pork	-	-	-
38	AFR E	Other	-	-	-
38	AMR A	Beef	-	-	-
38	AMR A	Goat, lamb and other small ruminants' meat	-	-	-
38	AMR A	Dairy (milk and milk products)	-	-	-
38	AMR A	Pork	-	-	-
38	AMR A	Other	-	-	-
38	AMR B	Beef	-	-	-
38	AMR B	Goat, lamb and other small ruminants' meat	-	-	-
38	AMR B	Dairy (milk and milk products)	-	-	-
38	AMR B	Pork	-	-	-
38	AMR B	Other	-	-	-
38	AMR D	Beef	-	-	-
38	AMR D	Goat, lamb and other small ruminants' meat	-	-	-
38	AMR D	Dairy (milk and milk products)	-	-	-
38	AMR D	Pork	-	-	-
38	AMR D	Other	-	-	-
38	EUR A	Beef	-	-	-
38	EUR A	Goat, lamb and other small ruminants' meat	-	-	-
38	EUR A	Dairy (milk and milk products)	-	-	-
38	EUR A	Pork	-	-	-
38	EUR A	Other	-	-	-
38	EUR B	Beef	-	-	-
38	EUR B	Goat, lamb and other small ruminants' meat	-	-	-
38	EUR B	Dairy (milk and milk products)	-	-	-
38	EUR B	Pork	-	-	-
38	EUR B	Other	-	-	-
38	EUR C	Beef	-	-	-
38	EUR C	Goat, lamb and other small ruminants' meat	-	-	-
38	EUR C	Dairy (milk and milk products)	-	-	-
38	EUR C	Pork	-	-	-
38	EUR C	Other	-	-	-
38	EMR B	Beef	-	-	-
38	EMR B	Goat, lamb and other small ruminants' meat	-	-	-
38	EMR B	Dairy (milk and milk products)	-	-	-
38	EMR B	Pork	-	-	-
38	EMR B	Other	-	-	-
38	EMR D	Beef	-	-	-
38	EMR D	Goat, lamb and other small ruminants' meat	-	-	-
38	EMR D	Dairy (milk and milk products)	-	-	-
38	EMR D	Pork	-	-	-
38	EMR D	Other	-	-	-
38	SEAR B	Beef	-	-	-
38	SEAR B	Goat, lamb and other small ruminants' meat	-	-	-
38	SEAR B	Dairy (milk and milk products)	-	-	-
38	SEAR B	Pork	-	-	-
38	SEAR B	Other	-	-	-
38	SEAR D	Beef	-	-	-
38	SEAR D	Goat, lamb and other small ruminants' meat	-	-	-
38	SEAR D	Dairy (milk and milk products)	-	-	-
38	SEAR D	Pork	-	-	-
38	SEAR D	Other	-	-	-
38	WPR A	Beef	-	-	-
38	WPR A	Goat, lamb and other small ruminants' meat	-	-	-
38	WPR A	Dairy (milk and milk products)	-	-	-
38	WPR A	Pork	-	-	-
38	WPR A	Other	-	-	-
38	WPR B	Beef	-	-	-
38	WPR B	Goat, lamb and other small ruminants' meat	-	-	-
38	WPR B	Dairy (milk and milk products)	-	-	-
38	WPR B	Pork	-	-	-
38	WPR B	Other	-	-	-
102	AFR D	Beef	0	0	0
102	AFR D	Goat, lamb and other small ruminants' meat	0.01	0.05	0.1
102	AFR D	Dairy (milk and milk products)	0.8	0.9	0.99
102	AFR D	Pork	0	0	0
102	AFR D	Other	0	0	0
102	AFR E	Beef	0	0	0
102	AFR E	Goat, lamb and other small ruminants' meat	0.01	0.05	0.1
102	AFR E	Dairy (milk and milk products)	0.8	0.9	0.99
102	AFR E	Pork	0	0	0
102	AFR E	Other	0	0	0
102	AMR A	Beef	-	-	-
102	AMR A	Goat, lamb and other small ruminants' meat	-	-	-
102	AMR A	Dairy (milk and milk products)	-	-	-
102	AMR A	Pork	-	-	-
102	AMR A	Other	-	-	-
102	AMR B	Beef	0	0	0
102	AMR B	Goat, lamb and other small ruminants' meat	0.001	0.01	0.03
102	AMR B	Dairy (milk and milk products)	0.9	0.95	0.99
102	AMR B	Pork	0.01	0.02	0.05
102	AMR B	Other	0	0	0
102	AMR D	Beef	0	0	0
102	AMR D	Goat, lamb and other small ruminants' meat	0.01	0.02	0.05
102	AMR D	Dairy (milk and milk products)	0.85	0.95	1
102	AMR D	Pork	0.01	0.05	0.1
102	AMR D	Other	0	0	0
102	EUR A	Beef	0	0	0
102	EUR A	Goat, lamb and other small ruminants' meat	0	0	0
102	EUR A	Dairy (milk and milk products)	0.9	0.95	1
102	EUR A	Pork	0	0.01	0.03
102	EUR A	Other	0	0	0
102	EUR B	Beef	0	0	0
102	EUR B	Goat, lamb and other small ruminants' meat	0.01	0.05	0.07
102	EUR B	Dairy (milk and milk products)	0.85	0.95	1
102	EUR B	Pork	-	0.01	-
102	EUR B	Other	0	0	0
102	EUR C	Beef	0	0	0
102	EUR C	Goat, lamb and other small ruminants' meat	0.01	0.02	0.05
102	EUR C	Dairy (milk and milk products)	0.85	0.9	0.99
102	EUR C	Pork	0.01	0.05	0.08
102	EUR C	Other	0	0	0
102	EMR B	Beef	0	0	0
102	EMR B	Goat, lamb and other small ruminants' meat	0	0.01	0.02
102	EMR B	Dairy (milk and milk products)	0.9	0.95	1
102	EMR B	Pork	0	0	0
102	EMR B	Other	0	0	0
102	EMR D	Beef	0	0	0
102	EMR D	Goat, lamb and other small ruminants' meat	0	0.05	0.07
102	EMR D	Dairy (milk and milk products)	0.9	0.95	1
102	EMR D	Pork	0	0	0
102	EMR D	Other	0	0	0
102	SEAR B	Beef	0	0	0
102	SEAR B	Goat, lamb and other small ruminants' meat	0	0	0
102	SEAR B	Dairy (milk and milk products)	0.8	0.9	1
102	SEAR B	Pork	0.01	0.05	0.07
102	SEAR B	Other	0	0	0
102	SEAR D	Beef	0	0	0
102	SEAR D	Goat, lamb and other small ruminants' meat	0	0.01	0.03
102	SEAR D	Dairy (milk and milk products)	0.9	0.95	1
102	SEAR D	Pork	0	0.01	0.03
102	SEAR D	Other	0	0	0
102	WPR A	Beef	0	0	0
102	WPR A	Goat, lamb and other small ruminants' meat	0	0.02	0.03
102	WPR A	Dairy (milk and milk products)	0.9	0.95	0.99
102	WPR A	Pork	0	0.01	0.02
102	WPR A	Other	0	0	0
102	WPR B	Beef	0	0	0
102	WPR B	Goat, lamb and other small ruminants' meat	0.01	0.05	0.08
102	WPR B	Dairy (milk and milk products)	0.9	0.95	0.99
102	WPR B	Pork	0.01	0.05	0.1
102	WPR B	Other	0	0	0

## Sheet: Campylobacter
Campylobacter spp.
Expert ID	Region	Food category	5th percentile	50th percentile	95th percentile
41	AFR E	Beef	0.05	0.05	0.15		This file contains anonymized data that was used in estimating results presented in:
41	AFR E	Dairy (milk and milk products)	0.15	0.25	0.3
41	AFR E	Fruits and Nuts	1e-08	1e-06	1e-05		Hoffmann et al., Estimates of the relative role of specific food categories in causing major foodborne enteric
41	AFR E	Goat, lamb and other small ruminants' meat	0.1	0.2	0.3		diseases around the world: Findings from a World Health Organization structured expert elicitation.
41	AFR E	Other foods	1e-08	1e-06	1e-05		PlosOne ___date___ and url.
41	AFR E	Pork	0.05	0.1	0.15
41	AFR E	Poultry Meat	0.15	0.4	0.5
41	AFR E	Vegetables (excluding dried legumes)	1e-08	1e-06	1e-05
53	AFR E	Beef	0.2	0.3	0.5
53	AFR E	Dairy (milk and milk products)	0.15	0.2	0.3
53	AFR E	Fruits and Nuts	1e-08	0.02	0.03
53	AFR E	Goat, lamb and other small ruminants' meat	0.05	0.1	0.3
53	AFR E	Other foods	1e-08	1e-06	1e-05
53	AFR E	Pork	0.01	0.03	0.05
53	AFR E	Poultry Meat	0.2	0.3	0.5
53	AFR E	Vegetables (excluding dried legumes)	0.01	0.03	0.05
60	AFR E	Beef	0.05	0.1	0.2
60	AFR E	Dairy (milk and milk products)	0.02	0.05	0.1
60	AFR E	Fruits and Nuts	0.02	0.05	0.06
60	AFR E	Goat, lamb and other small ruminants' meat	0.02	0.05	0.2
60	AFR E	Other foods	0.02	0.05	0.06
60	AFR E	Pork	0.02	0.05	0.1
60	AFR E	Poultry Meat	0.5	0.6	0.8
60	AFR E	Vegetables (excluding dried legumes)	0.05	0.1	0.15
62	AFR E	Beef	0.03	0.05	0.1
62	AFR E	Dairy (milk and milk products)	0.02	0.05	0.1
62	AFR E	Fruits and Nuts	0.01	0.02	0.03
62	AFR E	Goat, lamb and other small ruminants' meat	0.01	0.03	0.05
62	AFR E	Other foods	1e-08	1e-06	1e-05
62	AFR E	Pork	0.01	0.02	0.05
62	AFR E	Poultry Meat	0.7	0.8	0.8
62	AFR E	Vegetables (excluding dried legumes)	0.01	0.03	0.05
89	AFR E	Beef	0.05	0.1	0.2
89	AFR E	Dairy (milk and milk products)	0.2	0.3	0.4
89	AFR E	Fruits and Nuts	1e-08	0.01	0.02
89	AFR E	Goat, lamb and other small ruminants' meat	0.05	0.1	0.2
89	AFR E	Other foods	1e-08	0.01	0.02
89	AFR E	Pork	0.05	0.1	0.2
89	AFR E	Poultry Meat	0.2	0.3	0.4
89	AFR E	Vegetables (excluding dried legumes)	0.05	0.1	0.2
145	AFR E	Beef	1e-08	1e-06	1e-05
145	AFR E	Dairy (milk and milk products)	0.25	0.35	0.4
145	AFR E	Fruits and Nuts	1e-08	1e-06	1e-05
145	AFR E	Goat, lamb and other small ruminants' meat	1e-08	1e-06	1e-05
145	AFR E	Other foods	1e-08	1e-06	1e-05
145	AFR E	Pork	1e-08	1e-06	1e-05
145	AFR E	Poultry Meat	0.5	0.6	0.7
145	AFR E	Vegetables (excluding dried legumes)	0.02	0.05	0.1
181	AFR E	Beef	0.02	0.1	0.4
181	AFR E	Dairy (milk and milk products)	0.01	0.1	0.3
181	AFR E	Fruits and Nuts	0.02	0.05	0.2
181	AFR E	Goat, lamb and other small ruminants' meat	0.02	0.1	0.4
181	AFR E	Other foods	1e-08	1e-06	0.01
181	AFR E	Pork	0.01	0.1	0.4
181	AFR E	Poultry Meat	0.3	0.5	0.8
181	AFR E	Vegetables (excluding dried legumes)	0.02	0.05	0.15
200	AFR E	Beef	1e-08	0.05	0.1
200	AFR E	Dairy (milk and milk products)	0.2	0.33	0.4
200	AFR E	Fruits and Nuts	0.01	0.05	0.2
200	AFR E	Goat, lamb and other small ruminants' meat	1e-08	0.05	0.1
200	AFR E	Other foods	1e-08	1e-06	1e-05
200	AFR E	Pork	0.03	0.05	0.1
200	AFR E	Poultry Meat	0.15	0.3	0.4
200	AFR E	Vegetables (excluding dried legumes)	0.1	0.2	0.35
202	AFR E	Beef	0.05	0.12	0.25
202	AFR E	Dairy (milk and milk products)	0.05	0.1	0.2
202	AFR E	Fruits and Nuts	1e-08	0.01	0.02
202	AFR E	Goat, lamb and other small ruminants' meat	0.02	0.05	0.15
202	AFR E	Other foods	1e-08	0.01	0.02
202	AFR E	Pork	1e-08	0.05	0.1
202	AFR E	Poultry Meat	0.64	0.65	0.85
202	AFR E	Vegetables (excluding dried legumes)	1e-08	0.01	0.02
211	AFR E	Beef	0.02	0.05	0.1
211	AFR E	Dairy (milk and milk products)	0.05	0.15	0.25
211	AFR E	Fruits and Nuts	1e-08	1e-06	0.02
211	AFR E	Goat, lamb and other small ruminants' meat	0.02	0.11	0.2
211	AFR E	Other foods	1e-08	1e-06	0.02
211	AFR E	Pork	1e-08	1e-06	0.02
211	AFR E	Poultry Meat	0.4	0.63	0.85
211	AFR E	Vegetables (excluding dried legumes)	0.05	0.06	0.2
272	AFR E	Beef	0.05	0.15	0.27
272	AFR E	Dairy (milk and milk products)	1e-08	0.05	0.1
272	AFR E	Fruits and Nuts	1e-08	0.02	0.05
272	AFR E	Goat, lamb and other small ruminants' meat	0.05	0.2	0.3
272	AFR E	Other foods	1e-08	0.03	0.05
272	AFR E	Pork	1e-08	0.05	0.1
272	AFR E	Poultry Meat	0.15	0.45	0.6
272	AFR E	Vegetables (excluding dried legumes)	1e-08	0.05	0.1
288	AFR E	Beef	0.05	0.1	0.3
288	AFR E	Dairy (milk and milk products)	0.05	0.1	0.3
288	AFR E	Fruits and Nuts	0.03	0.05	0.1
288	AFR E	Goat, lamb and other small ruminants' meat	0.05	0.2	0.3
288	AFR E	Other foods	1e-08	1e-06	0.01
288	AFR E	Pork	0.05	0.1	0.3
288	AFR E	Poultry Meat	0.4	0.4	0.9
288	AFR E	Vegetables (excluding dried legumes)	0.03	0.05	0.1
41	AFR D	Beef	0.05	0.1	0.3
41	AFR D	Dairy (milk and milk products)	0.1	0.2	0.5
41	AFR D	Fruits and Nuts	1e-08	1e-06	1e-05
41	AFR D	Goat, lamb and other small ruminants' meat	0.05	0.1	0.3
41	AFR D	Other foods	1e-08	1e-06	1e-05
41	AFR D	Pork	0.05	0.1	0.3
41	AFR D	Poultry Meat	0.15	0.45	0.6
41	AFR D	Vegetables (excluding dried legumes)	0.05	0.05	0.15
53	AFR D	Beef	0.2	0.3	0.4
53	AFR D	Dairy (milk and milk products)	0.05	0.1	0.2
53	AFR D	Fruits and Nuts	1e-08	0.02	0.03
53	AFR D	Goat, lamb and other small ruminants' meat	0.05	0.07	0.15
53	AFR D	Other foods	1e-08	1e-06	1e-05
53	AFR D	Pork	0.02	0.03	0.05
53	AFR D	Poultry Meat	0.3	0.45	0.5
53	AFR D	Vegetables (excluding dried legumes)	0.02	0.03	0.05
59	AFR D	Beef	0.05	0.07	0.1
59	AFR D	Goat, lamb and other small ruminants' meat	0.05	0.1	0.2
59	AFR D	Dairy (milk and milk products)	0.3	0.35	0.37
59	AFR D	Pork	1e-08	1e-06	1e-05
59	AFR D	Poultry Meat	0.3	0.4	0.5
59	AFR D	Vegetables (excluding dried legumes)	0.02	0.05	0.1
59	AFR D	Fruits and Nuts	1e-08	1e-06	1e-05
59	AFR D	Other foods	0.01	0.03	0.05
60	AFR D	Beef	0.05	0.1	0.2
60	AFR D	Dairy (milk and milk products)	0.01	0.05	0.08
60	AFR D	Fruits and Nuts	0.02	0.05	0.06
60	AFR D	Goat, lamb and other small ruminants' meat	0.04	0.05	0.2
60	AFR D	Other foods	0.02	0.05	0.06
60	AFR D	Pork	0.04	0.05	0.2
60	AFR D	Poultry Meat	0.5	0.6	0.7
60	AFR D	Vegetables (excluding dried legumes)	0.05	0.1	0.15
62	AFR D	Beef	0.03	0.05	0.1
62	AFR D	Dairy (milk and milk products)	0.02	0.05	0.1
62	AFR D	Fruits and Nuts	0.01	0.02	0.03
62	AFR D	Goat, lamb and other small ruminants' meat	0.01	0.03	0.05
62	AFR D	Other foods	1e-08	1e-06	1e-05
62	AFR D	Pork	0.01	0.02	0.05
62	AFR D	Poultry Meat	0.7	0.8	0.85
62	AFR D	Vegetables (excluding dried legumes)	0.01	0.03	0.05
89	AFR D	Beef	0.05	0.1	0.2
89	AFR D	Dairy (milk and milk products)	0.2	0.3	0.4
89	AFR D	Fruits and Nuts	1e-08	0.01	0.02
89	AFR D	Goat, lamb and other small ruminants' meat	0.05	0.1	0.2
89	AFR D	Other foods	1e-08	0.01	0.02
89	AFR D	Pork	0.05	0.1	0.2
89	AFR D	Poultry Meat	0.2	0.3	0.4
89	AFR D	Vegetables (excluding dried legumes)	0.05	0.1	0.2
145	AFR D	Beef	1e-08	1e-06	1e-05
145	AFR D	Dairy (milk and milk products)	0.15	0.2	0.3
145	AFR D	Fruits and Nuts	1e-08	1e-06	1e-05
145	AFR D	Goat, lamb and other small ruminants' meat	1e-08	1e-06	1e-05
145	AFR D	Other foods	1e-08	1e-06	1e-05
145	AFR D	Pork	0.05	0.1	0.15
145	AFR D	Poultry Meat	0.45	0.6	0.7
145	AFR D	Vegetables (excluding dried legumes)	0.05	0.1	0.15
181	AFR D	Beef	0.02	0.1	0.4
181	AFR D	Dairy (milk and milk products)	0.01	0.1	0.3
181	AFR D	Fruits and Nuts	0.02	0.05	0.2
181	AFR D	Goat, lamb and other small ruminants' meat	0.02	0.15	0.4
181	AFR D	Other foods	1e-08	1e-06	0.01
181	AFR D	Pork	0.01	0.05	0.2
181	AFR D	Poultry Meat	0.3	0.5	0.8
181	AFR D	Vegetables (excluding dried legumes)	0.02	0.05	0.15
200	AFR D	Beef	1e-08	0.05	0.1
200	AFR D	Dairy (milk and milk products)	0.2	0.33	0.4
200	AFR D	Fruits and Nuts	0.01	0.05	0.2
200	AFR D	Goat, lamb and other small ruminants' meat	1e-08	0.05	0.1
200	AFR D	Other foods	1e-08	1e-06	1e-05
200	AFR D	Pork	0.03	0.05	0.1
200	AFR D	Poultry Meat	0.15	0.3	0.4
200	AFR D	Vegetables (excluding dried legumes)	0.1	0.2	0.35
202	AFR D	Beef	0.05	0.15	0.25
202	AFR D	Dairy (milk and milk products)	0.05	0.1	0.2
202	AFR D	Fruits and Nuts	1e-08	0.01	0.02
202	AFR D	Goat, lamb and other small ruminants' meat	0.02	0.09	0.2
202	AFR D	Other foods	1e-08	0.01	0.02
202	AFR D	Pork	1e-08	0.01	0.05
202	AFR D	Poultry Meat	0.64	0.65	0.85
202	AFR D	Vegetables (excluding dried legumes)	1e-08	0.01	0.02
211	AFR D	Beef	0.02	0.05	0.1
211	AFR D	Dairy (milk and milk products)	0.05	0.15	0.25
211	AFR D	Fruits and Nuts	1e-08	1e-06	0.02
211	AFR D	Goat, lamb and other small ruminants' meat	0.02	0.11	0.2
211	AFR D	Other foods	1e-08	1e-06	0.02
211	AFR D	Pork	1e-08	1e-06	0.02
211	AFR D	Poultry Meat	0.4	0.63	0.85
211	AFR D	Vegetables (excluding dried legumes)	0.05	0.06	0.2
272	AFR D	Beef	0.05	0.15	0.25
272	AFR D	Dairy (milk and milk products)	1e-08	0.05	0.1
272	AFR D	Fruits and Nuts	1e-08	0.02	0.05
272	AFR D	Goat, lamb and other small ruminants' meat	0.04	0.2	0.3
272	AFR D	Other foods	1e-08	0.03	0.05
272	AFR D	Pork	1e-08	0.05	0.08
272	AFR D	Poultry Meat	0.15	0.45	0.65
272	AFR D	Vegetables (excluding dried legumes)	1e-08	0.05	0.1
288	AFR D	Beef	0.05	0.1	0.3
288	AFR D	Dairy (milk and milk products)	0.05	0.1	0.3
288	AFR D	Fruits and Nuts	0.03	0.05	0.1
288	AFR D	Goat, lamb and other small ruminants' meat	0.05	0.2	0.3
288	AFR D	Other foods	1e-08	1e-06	0.01
288	AFR D	Pork	0.05	0.1	0.3
288	AFR D	Poultry Meat	0.4	0.4	0.9
288	AFR D	Vegetables (excluding dried legumes)	0.03	0.05	0.1
25	AMR A	Beef	0.03	0.04	0.05
25	AMR A	Dairy (milk and milk products)	1e-08	1e-06	0.01
25	AMR A	Fruits and Nuts	1e-08	1e-06	0.01
25	AMR A	Goat, lamb and other small ruminants' meat	0.05	0.08	0.1
25	AMR A	Other foods	1e-08	1e-06	0.01
25	AMR A	Pork	0.01	0.03	0.05
25	AMR A	Poultry Meat	0.7	0.75	0.8
25	AMR A	Vegetables (excluding dried legumes)	0.05	0.1	0.15
40	AMR A	Beef	0.01	0.04	0.05
40	AMR A	Dairy (milk and milk products)	0.19	0.25	0.5
40	AMR A	Fruits and Nuts	1e-08	0	1e-05
40	AMR A	Goat, lamb and other small ruminants' meat	1e-08	0	1e-05
40	AMR A	Other foods	0.02	0.03	0.05
40	AMR A	Pork	0.02	0.03	0.08
40	AMR A	Poultry Meat	0.3	0.6	0.7
40	AMR A	Vegetables (excluding dried legumes)	0.01	0.05	0.08
41	AMR A	Beef	1e-08	0	1e-05
41	AMR A	Dairy (milk and milk products)	0.1	0.3	0.4
41	AMR A	Fruits and Nuts	1e-08	1e-06	1e-05
41	AMR A	Goat, lamb and other small ruminants' meat	1e-08	0	1e-05
41	AMR A	Other foods	1e-08	1e-06	1e-05
41	AMR A	Pork	0.08	0.2	0.25
41	AMR A	Poultry Meat	0.1	0.5	0.65
41	AMR A	Vegetables (excluding dried legumes)	1e-08	1e-06	1e-05
53	AMR A	Beef	0.03	0.15	0.25
53	AMR A	Dairy (milk and milk products)	0.1	0.15	0.2
53	AMR A	Fruits and Nuts	1e-08	0.02	0.03
53	AMR A	Goat, lamb and other small ruminants' meat	0.03	0.08	0.15
53	AMR A	Other foods	1e-08	1e-06	1e-05
53	AMR A	Pork	0.15	0.22	0.25
53	AMR A	Poultry Meat	0.2	0.35	0.4
53	AMR A	Vegetables (excluding dried legumes)	0.01	0.03	0.05
89	AMR A	Beef	0.1	0.2	0.3
89	AMR A	Dairy (milk and milk products)	0.05	0.1	0.2
89	AMR A	Fruits and Nuts	1e-08	0.01	0.02
89	AMR A	Goat, lamb and other small ruminants' meat	0.1	0.2	0.3
89	AMR A	Other foods	1e-08	0.01	0.02
89	AMR A	Pork	0.05	0.1	0.2
89	AMR A	Poultry Meat	0.15	0.3	0.4
89	AMR A	Vegetables (excluding dried legumes)	0.05	0.1	0.2
130	AMR A	Beef	0.05	0.2	0.3
130	AMR A	Dairy (milk and milk products)	0.01	0.1	0.2
130	AMR A	Fruits and Nuts	1e-08	0.01	0.05
130	AMR A	Goat, lamb and other small ruminants' meat	0.01	0.05	0.1
130	AMR A	Other foods	1e-08	0.03	0.1
130	AMR A	Pork	0.01	0.05	0.2
130	AMR A	Poultry Meat	0.3	0.5	0.8
130	AMR A	Vegetables (excluding dried legumes)	0.01	0.05	0.2
160	AMR A	Beef	0.01	0.1	0.36
160	AMR A	Dairy (milk and milk products)	0.02	0.03	0.05
160	AMR A	Fruits and Nuts	1e-08	1e-06	0.01
160	AMR A	Goat, lamb and other small ruminants' meat	0.01	0.05	0.1
160	AMR A	Other foods	0.15	0.2	0.25
160	AMR A	Pork	0.01	0.02	0.05
160	AMR A	Poultry Meat	0.35	0.5	0.71
160	AMR A	Vegetables (excluding dried legumes)	1e-08	0.1	0.15
181	AMR A	Beef	0.01	0.05	0.1
181	AMR A	Dairy (milk and milk products)	1e-08	0.01	0.05
181	AMR A	Fruits and Nuts	1e-08	0.02	0.03
181	AMR A	Goat, lamb and other small ruminants' meat	0.01	0.02	0.05
181	AMR A	Other foods	1e-08	1e-06	0.01
181	AMR A	Pork	0.01	0.1	0.2
181	AMR A	Poultry Meat	0.5	0.78	0.95
181	AMR A	Vegetables (excluding dried legumes)	1e-08	0.02	0.03
188	AMR A	Beef	1e-08	1e-06	1e-05
188	AMR A	Dairy (milk and milk products)	0.1	0.2	0.25
188	AMR A	Fruits and Nuts	0.01	0.02	0.04
188	AMR A	Goat, lamb and other small ruminants' meat	0.01	0.05	0.1
188	AMR A	Other foods	1e-08	1e-06	1e-05
188	AMR A	Pork	0.02	0.05	0.07
188	AMR A	Poultry Meat	0.6	0.75	0.8
188	AMR A	Vegetables (excluding dried legumes)	0.01	0.05	0.07
193	AMR A	Beef	0.02	0.05	0.07
193	AMR A	Dairy (milk and milk products)	0.04	0.1	0.12
193	AMR A	Fruits and Nuts	1e-08	0.01	0.03
193	AMR A	Goat, lamb and other small ruminants' meat	0.01	0.02	0.03
193	AMR A	Other foods	1e-08	1e-06	1e-05
193	AMR A	Pork	0.02	0.05	0.08
193	AMR A	Poultry Meat	0.6	0.7	0.9
193	AMR A	Vegetables (excluding dried legumes)	0.01	0.06	0.1
200	AMR A	Beef	1e-08	0.01	0.05
200	AMR A	Dairy (milk and milk products)	0.3	0.38	0.6
200	AMR A	Fruits and Nuts	0.01	0.05	0.15
200	AMR A	Goat, lamb and other small ruminants' meat	1e-08	0.01	0.05
200	AMR A	Other foods	1e-08	1e-06	1e-05
200	AMR A	Pork	0.03	0.06	0.1
200	AMR A	Poultry Meat	0.15	0.35	0.5
200	AMR A	Vegetables (excluding dried legumes)	0.03	0.15	0.25
204	AMR A	Beef	0.15	0.25	0.3
204	AMR A	Dairy (milk and milk products)	0.01	0.03	0.06
204	AMR A	Fruits and Nuts	1e-08	1e-06	1e-05
204	AMR A	Goat, lamb and other small ruminants' meat	0.03	0.05	0.08
204	AMR A	Other foods	1e-08	1e-06	1e-05
204	AMR A	Pork	1e-08	0.03	0.06
204	AMR A	Poultry Meat	0.5	0.6	0.8
204	AMR A	Vegetables (excluding dried legumes)	0.02	0.04	0.06
211	AMR A	Beef	0.01	0.02	0.03
211	AMR A	Dairy (milk and milk products)	0.25	0.3	0.5
211	AMR A	Fruits and Nuts	0.02	0.05	0.07
211	AMR A	Goat, lamb and other small ruminants' meat	0.02	0.06	0.12
211	AMR A	Other foods	1e-08	1e-06	0.01
211	AMR A	Pork	1e-08	0.01	0.02
211	AMR A	Poultry Meat	0.3	0.46	0.7
211	AMR A	Vegetables (excluding dried legumes)	0.05	0.1	0.15
229	AMR A	Beef	0.01	0.07	0.15
229	AMR A	Dairy (milk and milk products)	0.01	0.05	0.15
229	AMR A	Fruits and Nuts	1e-08	0.01	0.02
229	AMR A	Goat, lamb and other small ruminants' meat	1e-08	0.01	0.03
229	AMR A	Other foods	1e-08	1e-06	1e-05
229	AMR A	Pork	0.05	0.16	0.25
229	AMR A	Poultry Meat	0.45	0.6	0.75
229	AMR A	Vegetables (excluding dried legumes)	0.03	0.1	0.17
288	AMR A	Beef	0.05	0.1	0.3
288	AMR A	Dairy (milk and milk products)	0.05	0.1	0.3
288	AMR A	Fruits and Nuts	0.03	0.05	0.1
288	AMR A	Goat, lamb and other small ruminants' meat	0.05	0.1	0.3
288	AMR A	Other foods	1e-08	1e-06	0.01
288	AMR A	Pork	0.05	0.1	0.3
288	AMR A	Poultry Meat	0.4	0.5	0.9
288	AMR A	Vegetables (excluding dried legumes)	0.03	0.05	0.1
25	AMR B	Beef	0.03	0.04	0.05
25	AMR B	Dairy (milk and milk products)	0.01	0.02	0.03
25	AMR B	Fruits and Nuts	1e-08	0.01	0.02
25	AMR B	Goat, lamb and other small ruminants' meat	0.05	0.08	0.1
25	AMR B	Other foods	1e-08	1e-06	0.01
25	AMR B	Pork	0.01	0.03	0.05
25	AMR B	Poultry Meat	0.7	0.75	0.8
25	AMR B	Vegetables (excluding dried legumes)	0.03	0.07	0.1
33	AMR B	Beef	1e-08	0.02	0.03
33	AMR B	Dairy (milk and milk products)	0.01	0.03	0.05
33	AMR B	Fruits and Nuts	1e-08	0.02	0.03
33	AMR B	Goat, lamb and other small ruminants' meat	0.01	0.03	0.05
33	AMR B	Other foods	1e-08	1e-06	1e-05
33	AMR B	Pork	0.01	0.03	0.05
33	AMR B	Poultry Meat	0.35	0.65	0.85
33	AMR B	Vegetables (excluding dried legumes)	0.11	0.2	0.28
40	AMR B	Beef	0.01	0.03	0.05
40	AMR B	Dairy (milk and milk products)	0.1	0.2	0.35
40	AMR B	Fruits and Nuts	1e-08	1e-06	1e-05
40	AMR B	Goat, lamb and other small ruminants' meat	1e-08	1e-06	1e-05
40	AMR B	Other foods	0.01	0.03	0.05
40	AMR B	Pork	0.02	0.03	0.08
40	AMR B	Poultry Meat	0.5	0.65	0.75
40	AMR B	Vegetables (excluding dried legumes)	0.01	0.06	0.08
41	AMR B	Beef	0.05	0.1	0.3
41	AMR B	Dairy (milk and milk products)	0.1	0.2	0.4
41	AMR B	Fruits and Nuts	1e-08	1e-06	1e-05
41	AMR B	Goat, lamb and other small ruminants' meat	0.05	0.1	0.3
41	AMR B	Other foods	1e-08	1e-06	1e-05
41	AMR B	Pork	0.1	0.2	0.4
41	AMR B	Poultry Meat	0.15	0.4	0.5
41	AMR B	Vegetables (excluding dried legumes)	1e-08	1e-06	1e-05
53	AMR B	Beef	0.1	0.3	0.4
53	AMR B	Dairy (milk and milk products)	0.03	0.05	0.1
53	AMR B	Fruits and Nuts	0.01	0.02	0.03
53	AMR B	Goat, lamb and other small ruminants' meat	0.05	0.1	0.2
53	AMR B	Other foods	1e-08	1e-06	1e-05
53	AMR B	Pork	0.1	0.2	0.3
53	AMR B	Poultry Meat	0.2	0.3	0.5
53	AMR B	Vegetables (excluding dried legumes)	0.01	0.03	0.05
89	AMR B	Beef	0.05	0.1	0.2
89	AMR B	Dairy (milk and milk products)	0.2	0.3	0.4
89	AMR B	Fruits and Nuts	1e-08	0.01	0.02
89	AMR B	Goat, lamb and other small ruminants' meat	0.02	0.05	0.1
89	AMR B	Other foods	1e-08	0.01	0.02
89	AMR B	Pork	0.05	0.1	0.2
89	AMR B	Poultry Meat	0.2	0.3	0.4
89	AMR B	Vegetables (excluding dried legumes)	0.1	0.15	0.3
145	AMR B	Beef	0.03	0.05	0.07
145	AMR B	Dairy (milk and milk products)	0.1	0.2	0.25
145	AMR B	Fruits and Nuts	1e-08	1e-06	1e-05
145	AMR B	Goat, lamb and other small ruminants' meat	1e-08	1e-06	1e-05
145	AMR B	Other foods	1e-08	1e-06	1e-05
145	AMR B	Pork	0.03	0.05	0.07
145	AMR B	Poultry Meat	0.4	0.5	0.65
145	AMR B	Vegetables (excluding dried legumes)	0.1	0.2	0.3
181	AMR B	Beef	0.02	0.1	0.4
181	AMR B	Dairy (milk and milk products)	0.01	0.02	0.2
181	AMR B	Fruits and Nuts	0.02	0.05	0.2
181	AMR B	Goat, lamb and other small ruminants' meat	0.02	0.1	0.4
181	AMR B	Other foods	1e-08	1e-06	0.01
181	AMR B	Pork	0.01	0.1	0.4
181	AMR B	Poultry Meat	0.3	0.58	0.8
181	AMR B	Vegetables (excluding dried legumes)	0.02	0.05	0.15
188	AMR B	Beef	0.03	0.05	0.08
188	AMR B	Dairy (milk and milk products)	0.15	0.2	0.25
188	AMR B	Fruits and Nuts	1e-08	1e-06	1e-05
188	AMR B	Goat, lamb and other small ruminants' meat	0.03	0.05	0.08
188	AMR B	Other foods	1e-08	1e-06	1e-05
188	AMR B	Pork	0.01	0.03	0.05
188	AMR B	Poultry Meat	0.6	0.7	0.8
188	AMR B	Vegetables (excluding dried legumes)	1e-08	1e-06	1e-05
200	AMR B	Beef	1e-08	0.05	0.1
200	AMR B	Dairy (milk and milk products)	0.2	0.33	0.4
200	AMR B	Fruits and Nuts	0.01	0.05	0.2
200	AMR B	Goat, lamb and other small ruminants' meat	1e-08	0.05	0.1
200	AMR B	Other foods	1e-08	1e-06	1e-05
200	AMR B	Pork	0.01	0.03	0.1
200	AMR B	Poultry Meat	0.2	0.35	0.45
200	AMR B	Vegetables (excluding dried legumes)	0.08	0.15	0.25
202	AMR B	Beef	0.05	0.07	0.25
202	AMR B	Dairy (milk and milk products)	0.05	0.05	0.2
202	AMR B	Fruits and Nuts	1e-08	0.01	0.02
202	AMR B	Goat, lamb and other small ruminants' meat	0.02	0.05	0.15
202	AMR B	Other foods	1e-08	0.01	0.02
202	AMR B	Pork	1e-08	0.05	0.1
202	AMR B	Poultry Meat	0.64	0.75	0.85
202	AMR B	Vegetables (excluding dried legumes)	1e-08	0.01	0.02
211	AMR B	Beef	0.02	0.05	0.1
211	AMR B	Dairy (milk and milk products)	0.05	0.15	0.25
211	AMR B	Fruits and Nuts	1e-08	1e-06	0.02
211	AMR B	Goat, lamb and other small ruminants' meat	0.02	0.11	0.2
211	AMR B	Other foods	1e-08	1e-06	0.02
211	AMR B	Pork	1e-08	1e-06	0.02
211	AMR B	Poultry Meat	0.4	0.63	0.85
211	AMR B	Vegetables (excluding dried legumes)	0.05	0.06	0.2
229	AMR B	Beef	0.02	0.09	0.2
229	AMR B	Dairy (milk and milk products)	1e-08	0.04	0.1
229	AMR B	Fruits and Nuts	1e-08	0.02	0.08
229	AMR B	Goat, lamb and other small ruminants' meat	1e-08	0.03	0.07
229	AMR B	Other foods	1e-08	1e-06	1e-05
229	AMR B	Pork	0.03	0.11	0.25
229	AMR B	Poultry Meat	0.45	0.65	0.85
229	AMR B	Vegetables (excluding dried legumes)	0.01	0.07	0.15
272	AMR B	Beef	0.02	0.1	0.25
272	AMR B	Dairy (milk and milk products)	1e-08	0.05	0.15
272	AMR B	Fruits and Nuts	1e-08	0.02	0.05
272	AMR B	Goat, lamb and other small ruminants' meat	0.05	0.2	0.4
272	AMR B	Other foods	1e-08	0.03	0.07
272	AMR B	Pork	0.03	0.1	0.2
272	AMR B	Poultry Meat	0.2	0.45	0.7
272	AMR B	Vegetables (excluding dried legumes)	1e-08	0.05	0.15
288	AMR B	Beef	0.05	0.1	0.3
288	AMR B	Dairy (milk and milk products)	0.05	0.1	0.3
288	AMR B	Fruits and Nuts	0.03	0.05	0.1
288	AMR B	Goat, lamb and other small ruminants' meat	0.05	0.2	0.3
288	AMR B	Other foods	1e-08	1e-06	0.01
288	AMR B	Pork	0.05	0.1	0.3
288	AMR B	Poultry Meat	0.4	0.4	0.9
288	AMR B	Vegetables (excluding dried legumes)	0.03	0.05	0.1
41	EMR B	Beef	0.05	0.15	0.4
41	EMR B	Dairy (milk and milk products)	0.1	0.15	0.5
41	EMR B	Fruits and Nuts	1e-08	1e-06	1e-05
41	EMR B	Goat, lamb and other small ruminants' meat	0.1	0.2	0.45
41	EMR B	Other foods	1e-08	1e-06	1e-05
41	EMR B	Pork	0.03	0.05	0.08
41	EMR B	Poultry Meat	0.2	0.4	0.6
41	EMR B	Vegetables (excluding dried legumes)	0.03	0.05	0.15
53	EMR B	Beef	0.2	0.3	0.4
53	EMR B	Dairy (milk and milk products)	0.05	0.15	0.25
53	EMR B	Fruits and Nuts	1e-08	0.01	0.02
53	EMR B	Goat, lamb and other small ruminants' meat	0.1	0.2	0.4
53	EMR B	Other foods	1e-08	1e-06	1e-05
53	EMR B	Pork	1e-08	0.02	0.03
53	EMR B	Poultry Meat	0.2	0.3	0.4
53	EMR B	Vegetables (excluding dried legumes)	0.01	0.02	0.04
60	EMR B	Beef	0.1	0.15	0.25
60	EMR B	Dairy (milk and milk products)	0.02	0.05	0.06
60	EMR B	Fruits and Nuts	0.01	0.02	0.04
60	EMR B	Goat, lamb and other small ruminants' meat	0.1	0.2	0.25
60	EMR B	Other foods	0.01	0.02	0.04
60	EMR B	Pork	0.02	0.05	0.1
60	EMR B	Poultry Meat	0.4	0.5	0.7
60	EMR B	Vegetables (excluding dried legumes)	0.02	0.05	0.06
89	EMR B	Beef	0.05	0.1	0.2
89	EMR B	Dairy (milk and milk products)	0.1	0.2	0.3
89	EMR B	Fruits and Nuts	1e-08	0.01	0.02
89	EMR B	Goat, lamb and other small ruminants' meat	0.1	0.2	0.3
89	EMR B	Other foods	1e-08	0.01	0.02
89	EMR B	Pork	0.02	0.05	0.07
89	EMR B	Poultry Meat	0.25	0.3	0.4
89	EMR B	Vegetables (excluding dried legumes)	0.1	0.15	0.3
145	EMR B	Beef	1e-08	1e-06	1e-05
145	EMR B	Dairy (milk and milk products)	0.1	0.15	0.25
145	EMR B	Fruits and Nuts	1e-08	1e-06	1e-05
145	EMR B	Goat, lamb and other small ruminants' meat	1e-08	1e-06	1e-05
145	EMR B	Other foods	1e-08	1e-06	1e-05
145	EMR B	Pork	1e-08	1e-06	1e-05
145	EMR B	Poultry Meat	0.5	0.6	0.7
145	EMR B	Vegetables (excluding dried legumes)	0.2	0.25	0.3
181	EMR B	Beef	0.02	0.1	0.4
181	EMR B	Dairy (milk and milk products)	0.01	0.1	0.2
181	EMR B	Fruits and Nuts	0.02	0.05	0.2
181	EMR B	Goat, lamb and other small ruminants' meat	0.02	0.14	0.4
181	EMR B	Other foods	1e-08	1e-06	0.01
181	EMR B	Pork	1e-08	0.01	0.02
181	EMR B	Poultry Meat	0.3	0.55	0.8
181	EMR B	Vegetables (excluding dried legumes)	0.02	0.05	0.15
200	EMR B	Beef	1e-08	0.05	0.1
200	EMR B	Dairy (milk and milk products)	0.2	0.33	0.4
200	EMR B	Fruits and Nuts	0.01	0.05	0.2
200	EMR B	Goat, lamb and other small ruminants' meat	1e-08	0.05	0.1
200	EMR B	Other foods	1e-08	1e-06	1e-05
200	EMR B	Pork	0.01	0.03	0.1
200	EMR B	Poultry Meat	0.2	0.35	0.45
200	EMR B	Vegetables (excluding dried legumes)	0.08	0.15	0.25
202	EMR B	Beef	0.05	0.07	0.25
202	EMR B	Dairy (milk and milk products)	0.05	0.05	0.2
202	EMR B	Fruits and Nuts	1e-08	0.01	0.02
202	EMR B	Goat, lamb and other small ruminants' meat	0.02	0.05	0.15
202	EMR B	Other foods	1e-08	0.01	0.02
202	EMR B	Pork	1e-08	0.05	0.1
202	EMR B	Poultry Meat	0.6	0.75	0.85
202	EMR B	Vegetables (excluding dried legumes)	1e-08	0.01	0.02
211	EMR B	Beef	0.02	0.05	0.1
211	EMR B	Dairy (milk and milk products)	0.05	0.15	0.25
211	EMR B	Fruits and Nuts	1e-08	1e-06	0.02
211	EMR B	Goat, lamb and other small ruminants' meat	0.02	0.11	0.2
211	EMR B	Other foods	1e-08	1e-06	0.02
211	EMR B	Pork	1e-08	1e-06	0.02
211	EMR B	Poultry Meat	0.4	0.63	0.85
211	EMR B	Vegetables (excluding dried legumes)	0.05	0.06	0.2
272	EMR B	Beef	0.03	0.1	0.2
272	EMR B	Dairy (milk and milk products)	0.02	0.08	0.15
272	EMR B	Fruits and Nuts	1e-08	0.01	0.05
272	EMR B	Goat, lamb and other small ruminants' meat	0.05	0.2	0.35
272	EMR B	Other foods	1e-08	0.01	0.05
272	EMR B	Pork	1e-08	1e-06	1e-05
272	EMR B	Poultry Meat	0.25	0.55	0.7
272	EMR B	Vegetables (excluding dried legumes)	0.02	0.05	0.1
288	EMR B	Beef	0.05	0.1	0.3
288	EMR B	Dairy (milk and milk products)	0.05	0.1	0.3
288	EMR B	Fruits and Nuts	0.03	0.05	0.1
288	EMR B	Goat, lamb and other small ruminants' meat	0.05	0.2	0.3
288	EMR B	Other foods	1e-08	1e-06	0.01
288	EMR B	Pork	0.01	0.05	0.1
288	EMR B	Poultry Meat	0.4	0.45	0.9
288	EMR B	Vegetables (excluding dried legumes)	0.03	0.05	0.1
25	AMR D	Beef	1e-08	0.01	0.02
25	AMR D	Dairy (milk and milk products)	0.01	0.02	0.03
25	AMR D	Fruits and Nuts	1e-08	0.01	0.02
25	AMR D	Goat, lamb and other small ruminants' meat	0.05	0.1	0.15
25	AMR D	Other foods	1e-08	0	0.01
25	AMR D	Pork	0.01	0.03	0.05
25	AMR D	Poultry Meat	0.7	0.75	0.8
25	AMR D	Vegetables (excluding dried legumes)	0.05	0.08	0.1
33	AMR D	Beef	1e-08	0	1e-05
33	AMR D	Dairy (milk and milk products)	0.01	0.02	0.04
33	AMR D	Fruits and Nuts	1e-08	0.02	0.04
33	AMR D	Goat, lamb and other small ruminants' meat	1e-08	0.01	0.02
33	AMR D	Other foods	1e-08	0	1e-05
33	AMR D	Pork	0.02	0.05	0.08
33	AMR D	Poultry Meat	0.4	0.65	0.85
33	AMR D	Vegetables (excluding dried legumes)	0.11	0.25	0.3
40	AMR D	Beef	0.01	0.03	0.05
40	AMR D	Dairy (milk and milk products)	0.1	0.25	0.35
40	AMR D	Fruits and Nuts	1e-08	0	1e-05
40	AMR D	Goat, lamb and other small ruminants' meat	1e-08	0	1e-05
40	AMR D	Other foods	0.02	0.06	0.1
40	AMR D	Pork	0.02	0.03	0.08
40	AMR D	Poultry Meat	0.5	0.55	0.8
40	AMR D	Vegetables (excluding dried legumes)	0.01	0.08	0.15
41	AMR D	Beef	0.05	0.1	0.3
41	AMR D	Dairy (milk and milk products)	0.1	0.2	0.45
41	AMR D	Fruits and Nuts	1e-08	1e-06	1e-05
41	AMR D	Goat, lamb and other small ruminants' meat	0.05	0.1	0.3
41	AMR D	Other foods	1e-08	1e-06	1e-05
41	AMR D	Pork	0.05	0.15	0.2
41	AMR D	Poultry Meat	0.25	0.45	0.6
41	AMR D	Vegetables (excluding dried legumes)	1e-08	1e-06	1e-05
53	AMR D	Beef	0.1	0.2	0.3
53	AMR D	Dairy (milk and milk products)	0.05	0.07	0.1
53	AMR D	Fruits and Nuts	1e-08	0.02	0.03
53	AMR D	Goat, lamb and other small ruminants' meat	0.03	0.05	0.1
53	AMR D	Other foods	1e-08	1e-06	1e-05
53	AMR D	Pork	0.1	0.2	0.3
53	AMR D	Poultry Meat	0.3	0.4	0.6
53	AMR D	Vegetables (excluding dried legumes)	0.02	0.03	0.05
89	AMR D	Beef	0.05	0.1	0.2
89	AMR D	Dairy (milk and milk products)	0.2	0.3	0.4
89	AMR D	Fruits and Nuts	1e-08	0.01	0.02
89	AMR D	Goat, lamb and other small ruminants' meat	0.02	0.05	0.1
89	AMR D	Other foods	1e-08	0.01	0.02
89	AMR D	Pork	0.05	0.1	0.2
89	AMR D	Poultry Meat	0.2	0.3	0.4
89	AMR D	Vegetables (excluding dried legumes)	0.1	0.15	0.3
145	AMR D	Beef	0.03	0.05	0.07
145	AMR D	Dairy (milk and milk products)	0.15	0.2	0.25
145	AMR D	Fruits and Nuts	1e-08	1e-06	1e-05
145	AMR D	Goat, lamb and other small ruminants' meat	1e-08	1e-06	1e-05
145	AMR D	Other foods	1e-08	1e-06	1e-05
145	AMR D	Pork	0.1	0.15	0.2
145	AMR D	Poultry Meat	0.4	0.5	0.7
145	AMR D	Vegetables (excluding dried legumes)	0.05	0.1	0.15
181	AMR D	Beef	0.02	0.1	0.4
181	AMR D	Dairy (milk and milk products)	0.01	0.05	0.2
181	AMR D	Fruits and Nuts	0.02	0.05	0.2
181	AMR D	Goat, lamb and other small ruminants' meat	0.02	0.1	0.4
181	AMR D	Other foods	1e-08	1e-06	0.01
181	AMR D	Pork	0.01	0.1	0.4
181	AMR D	Poultry Meat	0.3	0.55	0.8
181	AMR D	Vegetables (excluding dried legumes)	0.02	0.05	0.15
188	AMR D	Beef	1e-08	1e-06	1e-05
188	AMR D	Dairy (milk and milk products)	0.25	0.3	0.35
188	AMR D	Fruits and Nuts	1e-08	1e-06	1e-05
188	AMR D	Goat, lamb and other small ruminants' meat	0.05	0.08	0.1
188	AMR D	Other foods	1e-08	1e-06	1e-05
188	AMR D	Pork	0.02	0.04	0.07
188	AMR D	Poultry Meat	0.4	0.5	0.6
188	AMR D	Vegetables (excluding dried legumes)	0.01	0.03	0.05
200	AMR D	Beef	1e-08	0.05	0.1
200	AMR D	Dairy (milk and milk products)	0.2	0.33	0.4
200	AMR D	Fruits and Nuts	0.01	0.05	0.2
200	AMR D	Goat, lamb and other small ruminants' meat	1e-08	0.05	0.1
200	AMR D	Other foods	1e-08	1e-06	1e-05
200	AMR D	Pork	0.03	0.05	0.1
200	AMR D	Poultry Meat	0.15	0.3	0.4
200	AMR D	Vegetables (excluding dried legumes)	0.1	0.2	0.35
202	AMR D	Beef	0.05	0.07	0.25
202	AMR D	Dairy (milk and milk products)	0.05	0.05	0.2
202	AMR D	Fruits and Nuts	1e-08	0.01	0.02
202	AMR D	Goat, lamb and other small ruminants' meat	0.02	0.05	0.15
202	AMR D	Other foods	1e-08	0.01	0.02
202	AMR D	Pork	1e-08	0.05	0.1
202	AMR D	Poultry Meat	0.6	0.75	0.85
202	AMR D	Vegetables (excluding dried legumes)	1e-08	0.01	0.02
211	AMR D	Beef	0.02	0.05	0.1
211	AMR D	Dairy (milk and milk products)	0.05	0.15	0.25
211	AMR D	Fruits and Nuts	1e-08	1e-06	0.02
211	AMR D	Goat, lamb and other small ruminants' meat	0.02	0.11	0.2
211	AMR D	Other foods	1e-08	1e-06	0.02
211	AMR D	Pork	1e-08	1e-06	0.02
211	AMR D	Poultry Meat	0.4	0.63	0.85
211	AMR D	Vegetables (excluding dried legumes)	0.05	0.06	0.2
229	AMR D	Beef	1e-08	0.03	0.1
229	AMR D	Dairy (milk and milk products)	1e-08	0.05	0.15
229	AMR D	Fruits and Nuts	1e-08	0.03	0.1
229	AMR D	Goat, lamb and other small ruminants' meat	0.01	0.07	0.15
229	AMR D	Other foods	1e-08	1e-06	1e-05
229	AMR D	Pork	1e-08	0.07	0.15
229	AMR D	Poultry Meat	0.35	0.56	0.75
229	AMR D	Vegetables (excluding dried legumes)	0.05	0.19	0.35
272	AMR D	Beef	0.03	0.15	0.25
272	AMR D	Dairy (milk and milk products)	0.01	0.05	0.1
272	AMR D	Fruits and Nuts	1e-08	0.02	0.05
272	AMR D	Goat, lamb and other small ruminants' meat	0.05	0.2	0.4
272	AMR D	Other foods	1e-08	0.03	0.06
272	AMR D	Pork	0.03	0.1	0.15
272	AMR D	Poultry Meat	0.1	0.4	0.65
272	AMR D	Vegetables (excluding dried legumes)	0.01	0.05	0.1
288	AMR D	Beef	0.05	0.1	0.3
288	AMR D	Dairy (milk and milk products)	0.05	0.1	0.3
288	AMR D	Fruits and Nuts	0.03	0.05	0.1
288	AMR D	Goat, lamb and other small ruminants' meat	0.05	0.2	0.3
288	AMR D	Other foods	1e-08	1e-06	0.01
288	AMR D	Pork	0.05	0.1	0.3
288	AMR D	Poultry Meat	0.4	0.4	0.9
288	AMR D	Vegetables (excluding dried legumes)	0.03	0.05	0.1
41	EMR D	Beef	0.1	0.2	0.4
41	EMR D	Dairy (milk and milk products)	0.05	0.15	0.3
41	EMR D	Fruits and Nuts	0.02	0.04	0.05
41	EMR D	Goat, lamb and other small ruminants' meat	0.05	0.15	0.3
41	EMR D	Other foods	1e-08	1e-06	1e-05
41	EMR D	Pork	0.02	0.02	0.05
41	EMR D	Poultry Meat	0.2	0.4	0.5
41	EMR D	Vegetables (excluding dried legumes)	0.02	0.04	0.05
53	EMR D	Beef	0.2	0.3	0.4
53	EMR D	Dairy (milk and milk products)	0.05	0.15	0.25
53	EMR D	Fruits and Nuts	1e-08	0.01	0.02
53	EMR D	Goat, lamb and other small ruminants' meat	0.1	0.2	0.4
53	EMR D	Other foods	1e-08	1e-06	1e-05
53	EMR D	Pork	1e-08	0.02	0.03
53	EMR D	Poultry Meat	0.2	0.3	0.4
53	EMR D	Vegetables (excluding dried legumes)	0.01	0.02	0.04
60	EMR D	Beef	0.1	0.15	0.3
60	EMR D	Dairy (milk and milk products)	0.02	0.05	0.06
60	EMR D	Fruits and Nuts	0.01	0.02	0.03
60	EMR D	Goat, lamb and other small ruminants' meat	0.1	0.2	0.35
60	EMR D	Other foods	0.01	0.02	0.03
60	EMR D	Pork	0.02	0.05	0.15
60	EMR D	Poultry Meat	0.3	0.5	0.7
60	EMR D	Vegetables (excluding dried legumes)	0.02	0.05	0.06
89	EMR D	Beef	0.05	0.1	0.2
89	EMR D	Dairy (milk and milk products)	0.1	0.2	0.3
89	EMR D	Fruits and Nuts	1e-08	0.01	0.02
89	EMR D	Goat, lamb and other small ruminants' meat	0.1	0.2	0.3
89	EMR D	Other foods	1e-08	0.01	0.02
89	EMR D	Pork	0.02	0.05	0.07
89	EMR D	Poultry Meat	0.25	0.3	0.4
89	EMR D	Vegetables (excluding dried legumes)	0.1	0.15	0.3
145	EMR D	Beef	1e-08	1e-06	1e-05
145	EMR D	Dairy (milk and milk products)	0.1	0.15	0.25
145	EMR D	Fruits and Nuts	1e-08	1e-06	1e-05
145	EMR D	Goat, lamb and other small ruminants' meat	1e-08	1e-06	1e-05
145	EMR D	Other foods	1e-08	1e-06	1e-05
145	EMR D	Pork	1e-08	1e-06	1e-05
145	EMR D	Poultry Meat	0.5	0.6	0.7
145	EMR D	Vegetables (excluding dried legumes)	0.2	0.25	0.3
181	EMR D	Beef	0.02	0.1	0.4
181	EMR D	Dairy (milk and milk products)	0.01	0.1	0.2
181	EMR D	Fruits and Nuts	0.02	0.05	0.2
181	EMR D	Goat, lamb and other small ruminants' meat	0.02	0.14	0.4
181	EMR D	Other foods	1e-08	1e-06	0.01
181	EMR D	Pork	1e-08	0.01	0.02
181	EMR D	Poultry Meat	0.3	0.55	0.8
181	EMR D	Vegetables (excluding dried legumes)	0.02	0.05	0.15
200	EMR D	Beef	1e-08	0.05	0.1
200	EMR D	Dairy (milk and milk products)	0.2	0.33	0.4
200	EMR D	Fruits and Nuts	0.01	0.05	0.2
200	EMR D	Goat, lamb and other small ruminants' meat	1e-08	0.05	0.1
200	EMR D	Other foods	1e-08	1e-06	1e-05
200	EMR D	Pork	0.03	0.05	0.1
200	EMR D	Poultry Meat	0.15	0.3	0.4
200	EMR D	Vegetables (excluding dried legumes)	0.1	0.2	0.35
202	EMR D	Beef	0.05	0.07	0.25
202	EMR D	Dairy (milk and milk products)	0.05	0.05	0.2
202	EMR D	Fruits and Nuts	1e-08	0.01	0.02
202	EMR D	Goat, lamb and other small ruminants' meat	0.02	0.05	0.15
202	EMR D	Other foods	1e-08	0.01	0.02
202	EMR D	Pork	1e-08	0.05	0.1
202	EMR D	Poultry Meat	0.6	0.75	0.85
202	EMR D	Vegetables (excluding dried legumes)	1e-08	0.01	0.02
211	EMR D	Beef	0.02	0.05	0.1
211	EMR D	Dairy (milk and milk products)	0.05	0.15	0.25
211	EMR D	Fruits and Nuts	1e-08	1e-06	0.02
211	EMR D	Goat, lamb and other small ruminants' meat	0.02	0.11	0.2
211	EMR D	Other foods	1e-08	1e-06	0.02
211	EMR D	Pork	1e-08	1e-06	0.02
211	EMR D	Poultry Meat	0.4	0.63	0.85
211	EMR D	Vegetables (excluding dried legumes)	0.05	0.06	0.2
272	EMR D	Beef	0.04	0.1	0.2
272	EMR D	Dairy (milk and milk products)	0.01	0.05	0.09
272	EMR D	Fruits and Nuts	1e-08	0.02	0.05
272	EMR D	Goat, lamb and other small ruminants' meat	0.05	0.15	0.25
272	EMR D	Other foods	1e-08	0.03	0.05
272	EMR D	Pork	1e-08	1e-06	1e-05
272	EMR D	Poultry Meat	0.25	0.6	0.75
272	EMR D	Vegetables (excluding dried legumes)	0.01	0.05	0.1
288	EMR D	Beef	0.05	0.1	0.3
288	EMR D	Dairy (milk and milk products)	0.05	0.1	0.3
288	EMR D	Fruits and Nuts	0.03	0.05	0.1
288	EMR D	Goat, lamb and other small ruminants' meat	0.05	0.2	0.3
288	EMR D	Other foods	1e-08	1e-06	0.01
288	EMR D	Pork	0.01	0.05	0.1
288	EMR D	Poultry Meat	0.4	0.45	0.9
288	EMR D	Vegetables (excluding dried legumes)	0.03	0.05	0.1
19	EUR A	Beef	1e-08	0.03	0.05
19	EUR A	Dairy (milk and milk products)	0.05	0.15	0.25
19	EUR A	Fruits and Nuts	1e-08	0.02	0.05
19	EUR A	Goat, lamb and other small ruminants' meat	1e-08	0.03	0.05
19	EUR A	Other foods	1e-08	0	1e-05
19	EUR A	Pork	0.02	0.05	0.1
19	EUR A	Poultry Meat	0.4	0.6	0.8
19	EUR A	Vegetables (excluding dried legumes)	0.05	0.12	0.2
41	EUR A	Beef	1e-08	1e-06	1e-05
41	EUR A	Dairy (milk and milk products)	0.08	0.3	0.33
41	EUR A	Fruits and Nuts	1e-08	1e-06	1e-05
41	EUR A	Goat, lamb and other small ruminants' meat	1e-08	1e-06	1e-05
41	EUR A	Other foods	1e-08	1e-06	1e-05
41	EUR A	Pork	0.1	0.2	0.25
41	EUR A	Poultry Meat	0.1	0.5	0.6
41	EUR A	Vegetables (excluding dried legumes)	1e-08	1e-06	1e-05
53	EUR A	Beef	0.05	0.15	0.3
53	EUR A	Dairy (milk and milk products)	0.05	0.15	0.3
53	EUR A	Fruits and Nuts	1e-08	0.02	0.05
53	EUR A	Goat, lamb and other small ruminants' meat	0.05	0.1	0.2
53	EUR A	Other foods	1e-08	1e-06	1e-05
53	EUR A	Pork	0.1	0.2	0.3
53	EUR A	Poultry Meat	0.15	0.35	0.4
53	EUR A	Vegetables (excluding dried legumes)	0.01	0.03	0.05
89	EUR A	Beef	0.05	0.1	0.2
89	EUR A	Dairy (milk and milk products)	0.05	0.1	0.2
89	EUR A	Fruits and Nuts	1e-08	0.01	0.02
89	EUR A	Goat, lamb and other small ruminants' meat	0.05	0.1	0.2
89	EUR A	Other foods	1e-08	0.01	0.02
89	EUR A	Pork	0.02	0.05	0.1
89	EUR A	Poultry Meat	0.3	0.5	0.6
89	EUR A	Vegetables (excluding dried legumes)	0.1	0.2	0.3
130	EUR A	Beef	0.05	0.2	0.3
130	EUR A	Dairy (milk and milk products)	0.01	0.1	0.2
130	EUR A	Fruits and Nuts	1e-08	0.01	0.05
130	EUR A	Goat, lamb and other small ruminants' meat	0.01	0.05	0.1
130	EUR A	Other foods	1e-08	0.03	0.1
130	EUR A	Pork	0.01	0.05	0.2
130	EUR A	Poultry Meat	0.3	0.5	0.8
130	EUR A	Vegetables (excluding dried legumes)	0.01	0.05	0.2
134	EUR A	Beef	0.01	0.06	0.1
134	EUR A	Dairy (milk and milk products)	0.01	0.04	0.1
134	EUR A	Fruits and Nuts	1e-08	0.01	0.03
134	EUR A	Goat, lamb and other small ruminants' meat	0.01	0.02	0.06
134	EUR A	Other foods	0.01	0.06	0.12
134	EUR A	Pork	0.01	0.03	0.1
134	EUR A	Poultry Meat	0.4	0.72	0.9
134	EUR A	Vegetables (excluding dried legumes)	0.02	0.06	0.15
136	EUR A	Beef	0.05	0.1	0.15
136	EUR A	Dairy (milk and milk products)	0.12	0.15	0.17
136	EUR A	Fruits and Nuts	0.01	0.02	0.03
136	EUR A	Goat, lamb and other small ruminants' meat	0.03	0.05	0.1
136	EUR A	Other foods	0.02	0.05	0.08
136	EUR A	Pork	0.05	0.1	0.15
136	EUR A	Poultry Meat	0.45	0.5	0.55
136	EUR A	Vegetables (excluding dried legumes)	0.01	0.03	0.05
147	EUR A	Beef	0.02	0.03	0.04
147	EUR A	Dairy (milk and milk products)	0.15	0.2	0.25
147	EUR A	Fruits and Nuts	0.01	0.01	0.02
147	EUR A	Goat, lamb and other small ruminants' meat	0.02	0.03	0.04
147	EUR A	Other foods	1e-08	1e-06	1e-05
147	EUR A	Pork	0.15	0.2	0.25
147	EUR A	Poultry Meat	0.45	0.5	0.6
147	EUR A	Vegetables (excluding dried legumes)	0.01	0.03	0.04
160	EUR A	Beef	0.01	0.1	0.2
160	EUR A	Dairy (milk and milk products)	0.1	0.11	0.35
160	EUR A	Fruits and Nuts	1e-08	1e-06	0.01
160	EUR A	Goat, lamb and other small ruminants' meat	0.01	0.05	0.1
160	EUR A	Other foods	0.1	0.12	0.25
160	EUR A	Pork	0.01	0.02	0.05
160	EUR A	Poultry Meat	0.35	0.5	0.71
160	EUR A	Vegetables (excluding dried legumes)	1e-08	0.1	0.15
168	EUR A	Beef	0.02	0.08	0.1
168	EUR A	Dairy (milk and milk products)	0.02	0.05	0.06
168	EUR A	Fruits and Nuts	1e-08	1e-06	0.01
168	EUR A	Goat, lamb and other small ruminants' meat	0.02	0.05	0.06
168	EUR A	Other foods	1e-08	1e-06	1e-05
168	EUR A	Pork	0.04	0.1	0.12
168	EUR A	Poultry Meat	0.3	0.7	0.9
168	EUR A	Vegetables (excluding dried legumes)	0.01	0.02	0.05
181	EUR A	Beef	0.01	0.05	0.1
181	EUR A	Dairy (milk and milk products)	1e-08	0.01	0.05
181	EUR A	Fruits and Nuts	1e-08	0.02	0.03
181	EUR A	Goat, lamb and other small ruminants' meat	0.01	0.02	0.05
181	EUR A	Other foods	1e-08	1e-06	0.01
181	EUR A	Pork	0.01	0.1	0.2
181	EUR A	Poultry Meat	0.5	0.78	0.95
181	EUR A	Vegetables (excluding dried legumes)	1e-08	0.02	0.03
185	EUR A	Beef	0.1	0.15	0.2
185	EUR A	Dairy (milk and milk products)	0.05	0.1	0.15
185	EUR A	Fruits and Nuts	1e-08	1e-06	1e-05
185	EUR A	Goat, lamb and other small ruminants' meat	1e-08	1e-06	1e-05
185	EUR A	Other foods	1e-08	1e-06	1e-05
185	EUR A	Pork	1e-08	0.05	0.1
185	EUR A	Poultry Meat	0.5	0.65	0.8
185	EUR A	Vegetables (excluding dried legumes)	0.01	0.03	0.05
193	EUR A	Beef	0.01	0.02	0.04
193	EUR A	Dairy (milk and milk products)	0.02	0.05	0.08
193	EUR A	Fruits and Nuts	1e-08	0.02	0.03
193	EUR A	Goat, lamb and other small ruminants' meat	1e-08	0.01	0.02
193	EUR A	Other foods	1e-08	1e-06	1e-05
193	EUR A	Pork	0.01	0.02	0.08
193	EUR A	Poultry Meat	0.6	0.8	0.85
193	EUR A	Vegetables (excluding dried legumes)	0.03	0.09	0.12
204	EUR A	Beef	0.15	0.2	0.4
204	EUR A	Dairy (milk and milk products)	1e-08	0.02	0.04
204	EUR A	Fruits and Nuts	1e-08	1e-06	1e-05
204	EUR A	Goat, lamb and other small ruminants' meat	0.02	0.04	0.07
204	EUR A	Other foods	0.01	0.03	0.06
204	EUR A	Pork	0.01	0.04	0.06
204	EUR A	Poultry Meat	0.45	0.65	0.75
204	EUR A	Vegetables (excluding dried legumes)	0.01	0.02	0.04
288	EUR A	Beef	0.05	0.1	0.3
288	EUR A	Dairy (milk and milk products)	0.05	0.1	0.3
288	EUR A	Fruits and Nuts	0.03	0.05	0.1
288	EUR A	Goat, lamb and other small ruminants' meat	0.05	0.1	0.3
288	EUR A	Other foods	1e-08	1e-06	0.01
288	EUR A	Pork	0.05	0.1	0.3
288	EUR A	Poultry Meat	0.4	0.5	0.9
288	EUR A	Vegetables (excluding dried legumes)	0.03	0.05	0.1
19	EUR B	Beef	1e-08	0.02	0.05
19	EUR B	Dairy (milk and milk products)	0.05	0.2	0.3
19	EUR B	Fruits and Nuts	1e-08	0.01	0.03
19	EUR B	Goat, lamb and other small ruminants' meat	1e-08	0.02	0.05
19	EUR B	Other foods	1e-08	0	1e-05
19	EUR B	Pork	0.02	0.1	0.2
19	EUR B	Poultry Meat	0.3	0.5	0.7
19	EUR B	Vegetables (excluding dried legumes)	0.05	0.15	0.25
41	EUR B	Beef	0.1	0.15	0.45
41	EUR B	Dairy (milk and milk products)	0.1	0.15	0.4
41	EUR B	Fruits and Nuts	1e-08	1e-06	1e-05
41	EUR B	Goat, lamb and other small ruminants' meat	0.1	0.2	0.4
41	EUR B	Other foods	1e-08	1e-06	1e-05
41	EUR B	Pork	0.15	0.2	0.4
41	EUR B	Poultry Meat	0.15	0.3	0.5
41	EUR B	Vegetables (excluding dried legumes)	1e-08	1e-06	1e-05
53	EUR B	Beef	0.1	0.2	0.4
53	EUR B	Dairy (milk and milk products)	0.03	0.05	0.08
53	EUR B	Fruits and Nuts	0.01	0.02	0.03
53	EUR B	Goat, lamb and other small ruminants' meat	0.05	0.1	0.15
53	EUR B	Other foods	1e-08	1e-06	1e-05
53	EUR B	Pork	0.1	0.2	0.3
53	EUR B	Poultry Meat	0.2	0.4	0.6
53	EUR B	Vegetables (excluding dried legumes)	0.01	0.03	0.04
89	EUR B	Beef	0.1	0.2	0.3
89	EUR B	Dairy (milk and milk products)	0.05	0.1	0.2
89	EUR B	Fruits and Nuts	1e-08	0.01	0.02
89	EUR B	Goat, lamb and other small ruminants' meat	0.05	0.1	0.2
89	EUR B	Other foods	1e-08	0.01	0.02
89	EUR B	Pork	0.1	0.2	0.3
89	EUR B	Poultry Meat	0.15	0.2	0.4
89	EUR B	Vegetables (excluding dried legumes)	0.15	0.2	0.4
130	EUR B	Beef	0.01	0.05	0.3
130	EUR B	Dairy (milk and milk products)	0.01	0.1	0.3
130	EUR B	Fruits and Nuts	1e-08	0.01	0.05
130	EUR B	Goat, lamb and other small ruminants' meat	0.01	0.1	0.3
130	EUR B	Other foods	1e-08	0.03	0.1
130	EUR B	Pork	0.01	0.05	0.2
130	EUR B	Poultry Meat	0.3	0.5	0.8
130	EUR B	Vegetables (excluding dried legumes)	0.01	0.1	0.3
145	EUR B	Beef	0.03	0.05	0.07
145	EUR B	Dairy (milk and milk products)	0.1	0.15	0.2
145	EUR B	Fruits and Nuts	1e-08	1e-06	1e-05
145	EUR B	Goat, lamb and other small ruminants' meat	1e-08	1e-06	1e-05
145	EUR B	Other foods	1e-08	1e-06	1e-05
145	EUR B	Pork	0.1	0.15	0.2
145	EUR B	Poultry Meat	0.5	0.6	0.7
145	EUR B	Vegetables (excluding dried legumes)	0.02	0.05	0.1
147	EUR B	Beef	0.02	0.05	0.1
147	EUR B	Dairy (milk and milk products)	0.15	0.25	0.3
147	EUR B	Fruits and Nuts	0.01	0.01	0.02
147	EUR B	Goat, lamb and other small ruminants' meat	0.02	0.05	0.1
147	EUR B	Other foods	1e-08	1e-06	1e-05
147	EUR B	Pork	0.05	0.1	0.15
147	EUR B	Poultry Meat	0.4	0.44	0.6
147	EUR B	Vegetables (excluding dried legumes)	0.05	0.1	0.15
168	EUR B	Beef	0.02	0.06	0.15
168	EUR B	Dairy (milk and milk products)	0.02	0.08	0.1
168	EUR B	Fruits and Nuts	1e-08	1e-06	0.01
168	EUR B	Goat, lamb and other small ruminants' meat	0.02	0.08	0.15
168	EUR B	Other foods	1e-08	1e-06	1e-05
168	EUR B	Pork	0.04	0.1	0.12
168	EUR B	Poultry Meat	0.3	0.66	0.9
168	EUR B	Vegetables (excluding dried legumes)	0.01	0.02	0.05
181	EUR B	Beef	0.02	0.1	0.4
181	EUR B	Dairy (milk and milk products)	0.01	0.05	0.2
181	EUR B	Fruits and Nuts	0.02	0.05	0.2
181	EUR B	Goat, lamb and other small ruminants' meat	0.02	0.15	0.4
181	EUR B	Other foods	1e-08	1e-06	0.01
181	EUR B	Pork	0.01	0.05	0.4
181	EUR B	Poultry Meat	0.3	0.55	0.8
181	EUR B	Vegetables (excluding dried legumes)	0.02	0.05	0.15
185	EUR B	Beef	0.02	0.1	0.18
185	EUR B	Dairy (milk and milk products)	0.15	0.2	0.25
185	EUR B	Fruits and Nuts	1e-08	1e-06	1e-05
185	EUR B	Goat, lamb and other small ruminants' meat	0.01	0.05	0.09
185	EUR B	Other foods	1e-08	1e-06	1e-05
185	EUR B	Pork	0.01	0.05	0.09
185	EUR B	Poultry Meat	0.5	0.6	0.7
185	EUR B	Vegetables (excluding dried legumes)	0.01	0.03	0.05
202	EUR B	Beef	0.05	0.07	0.25
202	EUR B	Dairy (milk and milk products)	0.05	0.05	0.2
202	EUR B	Fruits and Nuts	1e-08	0.01	0.02
202	EUR B	Goat, lamb and other small ruminants' meat	0.02	0.05	0.15
202	EUR B	Other foods	1e-08	0.01	0.02
202	EUR B	Pork	1e-08	0.05	0.1
202	EUR B	Poultry Meat	0.6	0.75	0.85
202	EUR B	Vegetables (excluding dried legumes)	1e-08	0.01	0.02
272	EUR B	Beef	1e-08	0.05	0.15
272	EUR B	Dairy (milk and milk products)	0.02	0.1	0.14
272	EUR B	Fruits and Nuts	1e-08	0.02	0.05
272	EUR B	Goat, lamb and other small ruminants' meat	0.05	0.2	0.25
272	EUR B	Other foods	1e-08	0.03	0.05
272	EUR B	Pork	0.02	0.1	0.15
272	EUR B	Poultry Meat	0.2	0.45	0.65
272	EUR B	Vegetables (excluding dried legumes)	0.01	0.05	0.08
288	EUR B	Beef	0.05	0.1	0.3
288	EUR B	Dairy (milk and milk products)	0.05	0.1	0.3
288	EUR B	Fruits and Nuts	0.03	0.05	0.1
288	EUR B	Goat, lamb and other small ruminants' meat	0.05	0.15	0.3
288	EUR B	Other foods	1e-08	1e-06	0.01
288	EUR B	Pork	0.05	0.1	0.3
288	EUR B	Poultry Meat	0.4	0.45	0.9
288	EUR B	Vegetables (excluding dried legumes)	0.03	0.05	0.1
19	EUR C	Beef	1e-08	0.02	0.05
19	EUR C	Dairy (milk and milk products)	0.05	0.15	0.2
19	EUR C	Fruits and Nuts	1e-08	0.01	0.03
19	EUR C	Goat, lamb and other small ruminants' meat	1e-08	0.02	0.05
19	EUR C	Other foods	1e-08	0	1e-05
19	EUR C	Pork	0.02	0.15	0.25
19	EUR C	Poultry Meat	0.4	0.5	0.7
19	EUR C	Vegetables (excluding dried legumes)	0.05	0.15	0.25
41	EUR C	Beef	0.1	0.15	0.45
41	EUR C	Dairy (milk and milk products)	0.1	0.15	0.4
41	EUR C	Fruits and Nuts	1e-08	1e-06	1e-05
41	EUR C	Goat, lamb and other small ruminants' meat	0.1	0.2	0.4
41	EUR C	Other foods	1e-08	1e-06	1e-05
41	EUR C	Pork	0.15	0.2	0.4
41	EUR C	Poultry Meat	0.15	0.3	0.5
41	EUR C	Vegetables (excluding dried legumes)	1e-08	1e-06	1e-05
53	EUR C	Beef	0.1	0.2	0.4
53	EUR C	Dairy (milk and milk products)	0.03	0.05	0.1
53	EUR C	Fruits and Nuts	1e-08	0.02	0.05
53	EUR C	Goat, lamb and other small ruminants' meat	0.03	0.05	0.1
53	EUR C	Other foods	1e-08	1e-06	1e-05
53	EUR C	Pork	0.1	0.15	0.25
53	EUR C	Poultry Meat	0.3	0.5	0.6
53	EUR C	Vegetables (excluding dried legumes)	0.02	0.03	0.05
89	EUR C	Beef	0.1	0.2	0.3
89	EUR C	Dairy (milk and milk products)	0.05	0.1	0.2
89	EUR C	Fruits and Nuts	1e-08	0.01	0.02
89	EUR C	Goat, lamb and other small ruminants' meat	0.05	0.1	0.2
89	EUR C	Other foods	1e-08	0.01	0.02
89	EUR C	Pork	0.1	0.2	0.3
89	EUR C	Poultry Meat	0.15	0.2	0.4
89	EUR C	Vegetables (excluding dried legumes)	0.15	0.2	0.4
130	EUR C	Beef	0.01	0.05	0.3
130	EUR C	Dairy (milk and milk products)	0.01	0.1	0.3
130	EUR C	Fruits and Nuts	1e-08	0.01	0.05
130	EUR C	Goat, lamb and other small ruminants' meat	0.01	0.1	0.3
130	EUR C	Other foods	1e-08	0.03	0.1
130	EUR C	Pork	0.01	0.05	0.2
130	EUR C	Poultry Meat	0.3	0.5	0.8
130	EUR C	Vegetables (excluding dried legumes)	0.01	0.1	0.3
145	EUR C	Beef	1e-08	1e-06	1e-05
145	EUR C	Dairy (milk and milk products)	0.05	0.1	0.15
145	EUR C	Fruits and Nuts	1e-08	1e-06	1e-05
145	EUR C	Goat, lamb and other small ruminants' meat	1e-08	1e-06	1e-05
145	EUR C	Other foods	1e-08	1e-06	1e-05
145	EUR C	Pork	0.15	0.2	0.3
145	EUR C	Poultry Meat	0.6	0.7	0.8
145	EUR C	Vegetables (excluding dried legumes)	1e-08	1e-06	1e-05
147	EUR C	Beef	0.02	0.05	0.1
147	EUR C	Dairy (milk and milk products)	0.15	0.2	0.25
147	EUR C	Fruits and Nuts	0.005	0.01	0.02
147	EUR C	Goat, lamb and other small ruminants' meat	0.02	0.05	0.1
147	EUR C	Other foods	1e-08	1e-06	1e-05
147	EUR C	Pork	0.05	0.1	0.15
147	EUR C	Poultry Meat	0.4	0.45	0.6
147	EUR C	Vegetables (excluding dried legumes)	0.05	0.1	0.15
168	EUR C	Beef	0.02	0.05	0.1
168	EUR C	Dairy (milk and milk products)	0.02	0.04	0.15
168	EUR C	Fruits and Nuts	1e-08	1e-06	0.01
168	EUR C	Goat, lamb and other small ruminants' meat	0.02	0.05	0.1
168	EUR C	Other foods	1e-08	1e-06	1e-05
168	EUR C	Pork	0.04	0.05	0.2
168	EUR C	Poultry Meat	0.3	0.8	0.9
168	EUR C	Vegetables (excluding dried legumes)	1e-08	0.01	0.05
181	EUR C	Beef	0.02	0.1	0.4
181	EUR C	Dairy (milk and milk products)	0.01	0.05	0.2
181	EUR C	Fruits and Nuts	0.02	0.05	0.2
181	EUR C	Goat, lamb and other small ruminants' meat	0.02	0.1	0.4
181	EUR C	Other foods	1e-08	1e-06	0.01
181	EUR C	Pork	0.01	0.15	0.4
181	EUR C	Poultry Meat	0.3	0.5	0.8
181	EUR C	Vegetables (excluding dried legumes)	0.02	0.05	0.15
185	EUR C	Beef	1e-08	0.1	0.2
185	EUR C	Dairy (milk and milk products)	0.1	0.2	0.3
185	EUR C	Fruits and Nuts	1e-08	1e-06	1e-05
185	EUR C	Goat, lamb and other small ruminants' meat	1e-08	0.05	0.1
185	EUR C	Other foods	1e-08	1e-06	1e-05
185	EUR C	Pork	1e-08	0.05	0.1
185	EUR C	Poultry Meat	0.5	0.6	0.7
185	EUR C	Vegetables (excluding dried legumes)	0.01	0.03	0.05
202	EUR C	Beef	0.05	0.07	0.25
202	EUR C	Dairy (milk and milk products)	0.01	0.03	0.2
202	EUR C	Fruits and Nuts	1e-08	0.01	0.02
202	EUR C	Goat, lamb and other small ruminants' meat	0.01	0.02	0.15
202	EUR C	Other foods	1e-08	0.01	0.02
202	EUR C	Pork	1e-08	0.05	0.1
202	EUR C	Poultry Meat	0.6	0.8	0.85
202	EUR C	Vegetables (excluding dried legumes)	1e-08	0.01	0.02
272	EUR C	Beef	0.02	0.05	0.08
272	EUR C	Dairy (milk and milk products)	0.02	0.1	0.25
272	EUR C	Fruits and Nuts	1e-08	0.02	0.05
272	EUR C	Goat, lamb and other small ruminants' meat	0.05	0.2	0.35
272	EUR C	Other foods	1e-08	0.03	0.06
272	EUR C	Pork	0.02	0.1	0.2
272	EUR C	Poultry Meat	0.15	0.45	0.65
272	EUR C	Vegetables (excluding dried legumes)	0.01	0.05	0.09
288	EUR C	Beef	0.05	0.1	0.3
288	EUR C	Dairy (milk and milk products)	0.05	0.1	0.3
288	EUR C	Fruits and Nuts	0.03	0.05	0.1
288	EUR C	Goat, lamb and other small ruminants' meat	0.05	0.15	0.3
288	EUR C	Other foods	1e-08	1e-06	0.01
288	EUR C	Pork	0.05	0.1	0.3
288	EUR C	Poultry Meat	0.4	0.45	0.9
288	EUR C	Vegetables (excluding dried legumes)	0.03	0.05	0.1
10	SEAR B	Beef	0.02	0.05	0.1
10	SEAR B	Dairy (milk and milk products)	0.02	0.05	0.1
10	SEAR B	Fruits and Nuts	1e-08	0.01	0.03
10	SEAR B	Goat, lamb and other small ruminants' meat	0.01	0.03	0.1
10	SEAR B	Other foods	1e-08	0	0.01
10	SEAR B	Pork	0.35	0.45	0.65
10	SEAR B	Poultry Meat	0.3	0.4	0.6
10	SEAR B	Vegetables (excluding dried legumes)	1e-08	0.01	0.03
41	SEAR B	Beef	0.05	0.1	0.3
41	SEAR B	Dairy (milk and milk products)	0.1	0.25	0.55
41	SEAR B	Fruits and Nuts	0.05	0.05	0.1
41	SEAR B	Goat, lamb and other small ruminants' meat	0.05	0.1	0.3
41	SEAR B	Other foods	1e-08	1e-06	1e-05
41	SEAR B	Pork	0.05	0.05	0.1
41	SEAR B	Poultry Meat	0.34	0.4	0.45
41	SEAR B	Vegetables (excluding dried legumes)	0.05	0.05	0.1
53	SEAR B	Beef	0.02	0.07	0.15
53	SEAR B	Dairy (milk and milk products)	0.1	0.2	0.3
53	SEAR B	Fruits and Nuts	1e-08	0.02	0.04
53	SEAR B	Goat, lamb and other small ruminants' meat	0.05	0.15	0.3
53	SEAR B	Other foods	1e-08	1e-06	1e-05
53	SEAR B	Pork	0.05	0.2	0.3
53	SEAR B	Poultry Meat	0.1	0.3	0.4
53	SEAR B	Vegetables (excluding dried legumes)	0.02	0.06	0.1
89	SEAR B	Beef	0.05	0.1	0.25
89	SEAR B	Dairy (milk and milk products)	0.1	0.2	0.3
89	SEAR B	Fruits and Nuts	1e-08	0.01	0.02
89	SEAR B	Goat, lamb and other small ruminants' meat	0.1	0.2	0.3
89	SEAR B	Other foods	1e-08	0.01	0.02
89	SEAR B	Pork	0.05	0.1	0.12
89	SEAR B	Poultry Meat	0.1	0.2	0.3
89	SEAR B	Vegetables (excluding dried legumes)	0.1	0.2	0.4
145	SEAR B	Beef	1e-08	1e-06	1e-05
145	SEAR B	Dairy (milk and milk products)	0.25	0.3	0.35
145	SEAR B	Fruits and Nuts	1e-08	1e-06	1e-05
145	SEAR B	Goat, lamb and other small ruminants' meat	1e-08	1e-06	1e-05
145	SEAR B	Other foods	1e-08	1e-06	1e-05
145	SEAR B	Pork	0.05	0.1	0.2
145	SEAR B	Poultry Meat	0.4	0.5	0.6
145	SEAR B	Vegetables (excluding dried legumes)	0.05	0.1	0.15
177	SEAR B	Beef	1e-08	0.01	0.02
177	SEAR B	Dairy (milk and milk products)	0.6	0.8	0.95
177	SEAR B	Fruits and Nuts	1e-08	0.01	0.02
177	SEAR B	Goat, lamb and other small ruminants' meat	1e-08	0.01	0.02
177	SEAR B	Other foods	1e-08	0.01	0.02
177	SEAR B	Pork	0.01	0.05	0.1
177	SEAR B	Poultry Meat	0.05	0.09	0.15
177	SEAR B	Vegetables (excluding dried legumes)	0.01	0.02	0.03
181	SEAR B	Beef	0.02	0.1	0.4
181	SEAR B	Dairy (milk and milk products)	0.01	0.06	0.2
181	SEAR B	Fruits and Nuts	0.02	0.05	0.2
181	SEAR B	Goat, lamb and other small ruminants' meat	0.02	0.14	0.4
181	SEAR B	Other foods	1e-08	1e-06	0.01
181	SEAR B	Pork	1e-08	0.05	0.1
181	SEAR B	Poultry Meat	0.3	0.55	0.8
181	SEAR B	Vegetables (excluding dried legumes)	0.02	0.05	0.15
202	SEAR B	Beef	0.05	0.07	0.25
202	SEAR B	Dairy (milk and milk products)	0.05	0.05	0.2
202	SEAR B	Fruits and Nuts	1e-08	0.01	0.02
202	SEAR B	Goat, lamb and other small ruminants' meat	0.02	0.05	0.15
202	SEAR B	Other foods	1e-08	0.01	0.02
202	SEAR B	Pork	1e-08	0.05	0.1
202	SEAR B	Poultry Meat	0.6	0.75	0.85
202	SEAR B	Vegetables (excluding dried legumes)	1e-08	0.01	0.02
229	SEAR B	Beef	1e-08	0.03	0.1
229	SEAR B	Dairy (milk and milk products)	1e-08	0.02	0.05
229	SEAR B	Fruits and Nuts	1e-08	0.04	0.08
229	SEAR B	Goat, lamb and other small ruminants' meat	1e-08	0.07	0.15
229	SEAR B	Other foods	1e-08	1e-06	1e-05
229	SEAR B	Pork	0.02	0.1	0.2
229	SEAR B	Poultry Meat	0.3	0.51	0.7
229	SEAR B	Vegetables (excluding dried legumes)	0.1	0.22	0.35
272	SEAR B	Beef	0.04	0.1	0.2
272	SEAR B	Dairy (milk and milk products)	0.04	0.1	0.2
272	SEAR B	Fruits and Nuts	0.01	0.03	0.1
272	SEAR B	Goat, lamb and other small ruminants' meat	0.05	0.15	0.3
272	SEAR B	Other foods	1e-08	0.02	0.05
272	SEAR B	Pork	0.03	0.1	0.15
272	SEAR B	Poultry Meat	0.15	0.45	0.65
272	SEAR B	Vegetables (excluding dried legumes)	0.02	0.05	0.08
288	SEAR B	Beef	0.02	0.05	0.15
288	SEAR B	Dairy (milk and milk products)	0.05	0.1	0.3
288	SEAR B	Fruits and Nuts	0.03	0.05	0.1
288	SEAR B	Goat, lamb and other small ruminants' meat	0.05	0.2	0.3
288	SEAR B	Other foods	1e-08	1e-06	0.01
288	SEAR B	Pork	0.02	0.05	0.15
288	SEAR B	Poultry Meat	0.4	0.5	0.9
288	SEAR B	Vegetables (excluding dried legumes)	0.03	0.05	0.1
17	WPR A	Beef	0.12	0.21	0.31
17	WPR A	Dairy (milk and milk products)	0.07	0.15	0.34
17	WPR A	Fruits and Nuts	1e-08	1e-06	1e-05
17	WPR A	Goat, lamb and other small ruminants' meat	0.06	0.12	0.23
17	WPR A	Other foods	1e-08	1e-06	1e-05
17	WPR A	Pork	0.01	0.06	0.07
17	WPR A	Poultry Meat	0.18	0.3	0.45
17	WPR A	Vegetables (excluding dried legumes)	0.07	0.12	0.23
19	WPR A	Beef	1e-08	0.04	0.1
19	WPR A	Dairy (milk and milk products)	0.1	0.2	0.3
19	WPR A	Fruits and Nuts	1e-08	0.02	0.05
19	WPR A	Goat, lamb and other small ruminants' meat	1e-08	0.04	0.1
19	WPR A	Other foods	1e-08	0	1e-05
19	WPR A	Pork	0.01	0.05	0.1
19	WPR A	Poultry Meat	0.5	0.6	0.7
19	WPR A	Vegetables (excluding dried legumes)	0.02	0.05	0.1
41	WPR A	Beef	1e-08	1e-06	1e-05
41	WPR A	Dairy (milk and milk products)	0.08	0.3	0.35
41	WPR A	Fruits and Nuts	1e-08	1e-06	1e-05
41	WPR A	Goat, lamb and other small ruminants' meat	1e-08	1e-06	1e-05
41	WPR A	Other foods	1e-08	1e-06	1e-05
41	WPR A	Pork	0.05	0.2	0.25
41	WPR A	Poultry Meat	0.1	0.5	0.55
41	WPR A	Vegetables (excluding dried legumes)	1e-08	1e-06	1e-05
53	WPR A	Beef	0.05	0.15	0.3
53	WPR A	Dairy (milk and milk products)	0.05	0.15	0.3
53	WPR A	Fruits and Nuts	1e-08	0.02	0.05
53	WPR A	Goat, lamb and other small ruminants' meat	0.05	0.1	0.2
53	WPR A	Other foods	1e-08	1e-06	1e-05
53	WPR A	Pork	0.1	0.2	0.3
53	WPR A	Poultry Meat	0.15	0.35	0.4
53	WPR A	Vegetables (excluding dried legumes)	0.02	0.03	0.05
89	WPR A	Beef	0.1	0.2	0.3
89	WPR A	Dairy (milk and milk products)	0.05	0.2	0.3
89	WPR A	Fruits and Nuts	1e-08	0.01	0.02
89	WPR A	Goat, lamb and other small ruminants' meat	0.1	0.2	0.3
89	WPR A	Other foods	1e-08	0.01	0.02
89	WPR A	Pork	0.05	0.2	0.3
89	WPR A	Poultry Meat	0.15	0.2	0.3
89	WPR A	Vegetables (excluding dried legumes)	0.05	0.1	0.2
130	WPR A	Beef	0.05	0.2	0.3
130	WPR A	Dairy (milk and milk products)	0.01	0.1	0.2
130	WPR A	Fruits and Nuts	1e-08	0.01	0.05
130	WPR A	Goat, lamb and other small ruminants' meat	0.01	0.05	0.1
130	WPR A	Other foods	1e-08	0.03	0.1
130	WPR A	Pork	0.01	0.05	0.2
130	WPR A	Poultry Meat	0.3	0.5	0.8
130	WPR A	Vegetables (excluding dried legumes)	0.01	0.05	0.2
160	WPR A	Beef	0.01	0.1	0.2
160	WPR A	Dairy (milk and milk products)	0.02	0.03	0.05
160	WPR A	Fruits and Nuts	1e-08	1e-06	0.01
160	WPR A	Goat, lamb and other small ruminants' meat	0.01	0.05	0.1
160	WPR A	Other foods	0.15	0.2	0.25
160	WPR A	Pork	0.01	0.02	0.05
160	WPR A	Poultry Meat	0.35	0.5	0.71
160	WPR A	Vegetables (excluding dried legumes)	1e-08	0.1	0.15
181	WPR A	Beef	0.01	0.05	0.1
181	WPR A	Dairy (milk and milk products)	1e-08	0.01	0.05
181	WPR A	Fruits and Nuts	1e-08	0.02	0.03
181	WPR A	Goat, lamb and other small ruminants' meat	0.01	0.02	0.05
181	WPR A	Other foods	1e-08	1e-06	0.01
181	WPR A	Pork	0.01	0.1	0.2
181	WPR A	Poultry Meat	0.5	0.78	0.95
181	WPR A	Vegetables (excluding dried legumes)	1e-08	0.02	0.03
193	WPR A	Beef	0.01	0.05	0.07
193	WPR A	Dairy (milk and milk products)	0.02	0.05	0.12
193	WPR A	Fruits and Nuts	1e-08	0.01	0.02
193	WPR A	Goat, lamb and other small ruminants' meat	0.02	0.08	0.15
193	WPR A	Other foods	1e-08	1e-06	1e-05
193	WPR A	Pork	0.01	0.02	0.04
193	WPR A	Poultry Meat	0.7	0.75	0.8
193	WPR A	Vegetables (excluding dried legumes)	0.01	0.03	0.05
204	WPR A	Beef	0.15	0.24	0.3
204	WPR A	Dairy (milk and milk products)	0.01	0.02	0.05
204	WPR A	Fruits and Nuts	1e-08	1e-06	1e-05
204	WPR A	Goat, lamb and other small ruminants' meat	0.02	0.04	0.08
204	WPR A	Other foods	1e-08	1e-06	1e-05
204	WPR A	Pork	0.01	0.02	0.05
204	WPR A	Poultry Meat	0.5	0.65	0.8
204	WPR A	Vegetables (excluding dried legumes)	0.01	0.03	0.06
229	WPR A	Beef	1e-08	0.04	0.1
229	WPR A	Dairy (milk and milk products)	0.01	0.03	0.1
229	WPR A	Fruits and Nuts	1e-08	0.01	0.05
229	WPR A	Goat, lamb and other small ruminants' meat	1e-08	0.01	0.05
229	WPR A	Other foods	1e-08	1e-06	1e-05
229	WPR A	Pork	0.1	0.24	0.4
229	WPR A	Poultry Meat	0.3	0.48	0.7
229	WPR A	Vegetables (excluding dried legumes)	0.09	0.19	0.3
288	WPR A	Beef	0.05	0.1	0.3
288	WPR A	Dairy (milk and milk products)	0.05	0.1	0.3
288	WPR A	Fruits and Nuts	0.03	0.05	0.1
288	WPR A	Goat, lamb and other small ruminants' meat	0.05	0.1	0.3
288	WPR A	Other foods	1e-08	1e-06	0.01
288	WPR A	Pork	0.05	0.1	0.3
288	WPR A	Poultry Meat	0.4	0.5	0.9
288	WPR A	Vegetables (excluding dried legumes)	0.03	0.05	0.1
297	WPR A	Beef	1e-08	0.05	0.06
297	WPR A	Dairy (milk and milk products)	1e-08	0.05	0.1
297	WPR A	Fruits and Nuts	0.01	0.02	0.06
297	WPR A	Goat, lamb and other small ruminants' meat	0.02	0.04	0.1
297	WPR A	Other foods	1e-08	1e-06	1e-05
297	WPR A	Pork	0.01	0.02	0.05
297	WPR A	Poultry Meat	0.6	0.8	0.95
297	WPR A	Vegetables (excluding dried legumes)	0.02	0.02	0.1
2	SEAR D	Beef	1e-08	0.05	0.1
2	SEAR D	Dairy (milk and milk products)	1e-08	0.02	0.05
2	SEAR D	Fruits and Nuts	1e-08	0.05	0.08
2	SEAR D	Goat, lamb and other small ruminants' meat	1e-08	0.05	0.1
2	SEAR D	Other foods	1e-08	1e-06	1e-05
2	SEAR D	Pork	0.05	0.1	0.2
2	SEAR D	Poultry Meat	0.15	0.4	0.6
2	SEAR D	Vegetables (excluding dried legumes)	0.1	0.3	0.5
10	SEAR D	Beef	0.1	0.2	0.3
10	SEAR D	Dairy (milk and milk products)	0.05	0.1	0.2
10	SEAR D	Fruits and Nuts	1e-08	0.01	0.05
10	SEAR D	Goat, lamb and other small ruminants' meat	0.1	0.2	0.3
10	SEAR D	Other foods	1e-08	0	0.02
10	SEAR D	Pork	0.05	0.25	0.35
10	SEAR D	Poultry Meat	0.05	0.25	0.35
10	SEAR D	Vegetables (excluding dried legumes)	1e-08	0.01	0.05
30	SEAR D	Beef	0.02	0.05	0.1
30	SEAR D	Dairy (milk and milk products)	1e-08	0.01	0.05
30	SEAR D	Fruits and Nuts	1e-08	1e-06	1e-05
30	SEAR D	Goat, lamb and other small ruminants' meat	0.01	0.05	0.1
30	SEAR D	Other foods	0.01	0.05	0.15
30	SEAR D	Pork	1e-08	0.01	0.1
30	SEAR D	Poultry Meat	0.1	0.3	0.65
30	SEAR D	Vegetables (excluding dried legumes)	1e-08	0	1e-05
41	SEAR D	Beef	0.05	0.1	0.3
41	SEAR D	Dairy (milk and milk products)	0.15	0.2	0.35
41	SEAR D	Fruits and Nuts	0.05	0.05	0.1
41	SEAR D	Goat, lamb and other small ruminants' meat	0.05	0.1	0.3
41	SEAR D	Other foods	1e-08	1e-06	1e-05
41	SEAR D	Pork	0.05	0.1	0.3
41	SEAR D	Poultry Meat	0.2	0.4	0.55
41	SEAR D	Vegetables (excluding dried legumes)	0.05	0.05	0.1
48	SEAR D	Beef	1e-08	0.05	0.1
48	SEAR D	Dairy (milk and milk products)	0.35	0.5	0.7
48	SEAR D	Fruits and Nuts	1e-08	0.02	0.06
48	SEAR D	Goat, lamb and other small ruminants' meat	0.05	0.16	0.3
48	SEAR D	Other foods	1e-08	0.01	0.03
48	SEAR D	Pork	1e-08	0.05	0.15
48	SEAR D	Poultry Meat	0.1	0.2	0.4
48	SEAR D	Vegetables (excluding dried legumes)	1e-08	0.02	0.06
53	SEAR D	Beef	0.03	0.05	0.07
53	SEAR D	Dairy (milk and milk products)	0.1	0.2	0.3
53	SEAR D	Fruits and Nuts	1e-08	0.02	0.05
53	SEAR D	Goat, lamb and other small ruminants' meat	0.05	0.15	0.25
53	SEAR D	Other foods	1e-08	1e-06	1e-05
53	SEAR D	Pork	0.15	0.25	0.35
53	SEAR D	Poultry Meat	0.15	0.3	0.4
53	SEAR D	Vegetables (excluding dried legumes)	0.02	0.03	0.05
89	SEAR D	Beef	0.05	0.1	0.25
89	SEAR D	Dairy (milk and milk products)	0.1	0.2	0.3
89	SEAR D	Fruits and Nuts	1e-08	0.01	0.02
89	SEAR D	Goat, lamb and other small ruminants' meat	0.05	0.1	0.15
89	SEAR D	Other foods	1e-08	0.01	0.02
89	SEAR D	Pork	0.1	0.2	0.3
89	SEAR D	Poultry Meat	0.1	0.2	0.3
89	SEAR D	Vegetables (excluding dried legumes)	0.1	0.2	0.4
177	SEAR D	Beef	0.01	0.02	0.03
177	SEAR D	Dairy (milk and milk products)	0.5	0.7	0.95
177	SEAR D	Fruits and Nuts	0.01	0.02	0.03
177	SEAR D	Goat, lamb and other small ruminants' meat	0.01	0.03	0.05
177	SEAR D	Other foods	0.01	0.03	0.05
177	SEAR D	Pork	0.02	0.1	0.15
177	SEAR D	Poultry Meat	0.03	0.09	0.15
177	SEAR D	Vegetables (excluding dried legumes)	1e-08	0.01	0.03
181	SEAR D	Beef	0.02	0.05	0.4
181	SEAR D	Dairy (milk and milk products)	0.01	0.05	0.2
181	SEAR D	Fruits and Nuts	0.02	0.05	0.2
181	SEAR D	Goat, lamb and other small ruminants' meat	0.02	0.15	0.4
181	SEAR D	Other foods	1e-08	1e-06	0.01
181	SEAR D	Pork	1e-08	0.05	0.1
181	SEAR D	Poultry Meat	0.3	0.6	0.8
181	SEAR D	Vegetables (excluding dried legumes)	0.02	0.05	0.15
202	SEAR D	Beef	0.05	0.07	0.25
202	SEAR D	Dairy (milk and milk products)	0.05	0.05	0.2
202	SEAR D	Fruits and Nuts	1e-08	0.01	0.02
202	SEAR D	Goat, lamb and other small ruminants' meat	0.02	0.05	0.15
202	SEAR D	Other foods	1e-08	0.01	0.02
202	SEAR D	Pork	1e-08	0.05	0.1
202	SEAR D	Poultry Meat	0.6	0.75	0.85
202	SEAR D	Vegetables (excluding dried legumes)	1e-08	0.01	0.02
229	SEAR D	Beef	1e-08	0.03	0.1
229	SEAR D	Dairy (milk and milk products)	0.01	0.12	0.2
229	SEAR D	Fruits and Nuts	1e-08	0.04	0.08
229	SEAR D	Goat, lamb and other small ruminants' meat	0.02	0.14	0.25
229	SEAR D	Other foods	1e-08	1e-06	1e-05
229	SEAR D	Pork	1e-08	0.01	0.02
229	SEAR D	Poultry Meat	0.1	0.18	0.5
229	SEAR D	Vegetables (excluding dried legumes)	0.25	0.46	0.65
272	SEAR D	Beef	0.02	0.05	0.1
272	SEAR D	Dairy (milk and milk products)	0.05	0.1	0.2
272	SEAR D	Fruits and Nuts	1e-08	0.02	0.05
272	SEAR D	Goat, lamb and other small ruminants' meat	0.1	0.2	0.35
272	SEAR D	Other foods	1e-08	0.03	0.05
272	SEAR D	Pork	0.02	0.05	0.08
272	SEAR D	Poultry Meat	0.2	0.5	0.75
272	SEAR D	Vegetables (excluding dried legumes)	0.01	0.05	0.1
288	SEAR D	Beef	0.02	0.05	0.15
288	SEAR D	Dairy (milk and milk products)	0.05	0.1	0.3
288	SEAR D	Fruits and Nuts	0.03	0.05	0.1
288	SEAR D	Goat, lamb and other small ruminants' meat	0.05	0.2	0.3
288	SEAR D	Other foods	1e-08	1e-06	0.01
288	SEAR D	Pork	0.02	0.05	0.15
288	SEAR D	Poultry Meat	0.4	0.5	0.9
288	SEAR D	Vegetables (excluding dried legumes)	0.03	0.05	0.1
145	SEAR D	Beef	1e-08	1e-06	1e-05
145	SEAR D	Goat, lamb and other small ruminants' meat	1e-08	1e-06	1e-05
145	SEAR D	Dairy (milk and milk products)	0.25	0.3	0.35
145	SEAR D	Pork	0.05	0.1	0.2
145	SEAR D	Poultry Meat	0.4	0.5	0.6
145	SEAR D	Vegetables (excluding dried legumes)	0.05	0.1	0.15
145	SEAR D	Fruits and Nuts	1e-08	1e-06	1e-05
145	SEAR D	Other foods	1e-08	1e-06	1e-05
19	WPR B	Beef	1e-08	0.01	0.03
19	WPR B	Dairy (milk and milk products)	0.01	0.05	0.1
19	WPR B	Fruits and Nuts	1e-08	0.01	0.03
19	WPR B	Goat, lamb and other small ruminants' meat	1e-08	0.01	0.03
19	WPR B	Other foods	1e-08	0	1e-05
19	WPR B	Pork	0.1	0.2	0.3
19	WPR B	Poultry Meat	0.4	0.6	0.8
19	WPR B	Vegetables (excluding dried legumes)	0.05	0.12	0.2
41	WPR B	Beef	0.1	0.15	0.3
41	WPR B	Dairy (milk and milk products)	0.1	0.15	0.4
41	WPR B	Fruits and Nuts	1e-08	1e-06	1e-05
41	WPR B	Goat, lamb and other small ruminants' meat	0.05	0.1	0.3
41	WPR B	Other foods	1e-08	1e-06	1e-05
41	WPR B	Pork	0.1	0.15	0.4
41	WPR B	Poultry Meat	0.2	0.4	0.6
41	WPR B	Vegetables (excluding dried legumes)	0.05	0.05	0.1
53	WPR B	Beef	0.05	0.1	0.3
53	WPR B	Dairy (milk and milk products)	0.1	0.2	0.3
53	WPR B	Fruits and Nuts	0.01	0.03	0.05
53	WPR B	Goat, lamb and other small ruminants' meat	0.03	0.08	0.15
53	WPR B	Other foods	1e-08	1e-06	1e-05
53	WPR B	Pork	0.05	0.15	0.3
53	WPR B	Poultry Meat	0.3	0.4	0.6
53	WPR B	Vegetables (excluding dried legumes)	0.02	0.05	0.07
89	WPR B	Beef	0.1	0.15	0.2
89	WPR B	Dairy (milk and milk products)	0.1	0.2	0.3
89	WPR B	Fruits and Nuts	1e-08	0.01	0.02
89	WPR B	Goat, lamb and other small ruminants' meat	0.02	0.05	0.07
89	WPR B	Other foods	1e-08	0.01	0.02
89	WPR B	Pork	0.1	0.2	0.4
89	WPR B	Poultry Meat	0.1	0.2	0.4
89	WPR B	Vegetables (excluding dried legumes)	0.1	0.2	0.3
136	WPR B	Beef	0.03	0.05	0.08
136	WPR B	Dairy (milk and milk products)	0.1	0.15	0.25
136	WPR B	Fruits and Nuts	1e-08	1e-06	1e-05
136	WPR B	Goat, lamb and other small ruminants' meat	1e-08	1e-06	1e-05
136	WPR B	Other foods	1e-08	1e-06	1e-05
136	WPR B	Pork	1e-08	1e-06	1e-05
136	WPR B	Poultry Meat	0.6	0.7	0.8
136	WPR B	Vegetables (excluding dried legumes)	0.05	0.1	0.15
181	WPR B	Beef	0.02	0.05	0.4
181	WPR B	Dairy (milk and milk products)	0.01	0.05	0.2
181	WPR B	Fruits and Nuts	0.02	0.05	0.2
181	WPR B	Goat, lamb and other small ruminants' meat	0.02	0.1	0.4
181	WPR B	Other foods	1e-08	1e-06	0.01
181	WPR B	Pork	1e-08	0.15	0.4
181	WPR B	Poultry Meat	0.3	0.55	0.8
181	WPR B	Vegetables (excluding dried legumes)	0.02	0.05	0.15
202	WPR B	Beef	0.05	0.07	0.25
202	WPR B	Dairy (milk and milk products)	0.05	0.05	0.2
202	WPR B	Fruits and Nuts	1e-08	0.01	0.02
202	WPR B	Goat, lamb and other small ruminants' meat	0.02	0.05	0.15
202	WPR B	Other foods	1e-08	0.01	0.02
202	WPR B	Pork	1e-08	0.05	0.1
202	WPR B	Poultry Meat	0.6	0.75	0.85
202	WPR B	Vegetables (excluding dried legumes)	1e-08	0.01	0.02
229	WPR B	Beef	1e-08	0.01	0.07
229	WPR B	Dairy (milk and milk products)	1e-08	0.01	0.1
229	WPR B	Fruits and Nuts	1e-08	0.01	0.05
229	WPR B	Goat, lamb and other small ruminants' meat	0.01	0.08	0.15
229	WPR B	Other foods	1e-08	1e-06	1e-05
229	WPR B	Pork	0.1	0.28	0.5
229	WPR B	Poultry Meat	0.1	0.22	0.5
229	WPR B	Vegetables (excluding dried legumes)	0.2	0.38	0.6
272	WPR B	Beef	0.02	0.1	0.2
272	WPR B	Dairy (milk and milk products)	0.02	0.1	0.2
272	WPR B	Fruits and Nuts	1e-08	0.03	0.05
272	WPR B	Goat, lamb and other small ruminants' meat	0.03	0.1	0.15
272	WPR B	Other foods	1e-08	0.02	0.05
272	WPR B	Pork	0.05	0.2	0.4
272	WPR B	Poultry Meat	0.15	0.4	0.6
272	WPR B	Vegetables (excluding dried legumes)	0.01	0.05	0.1
288	WPR B	Beef	0.02	0.05	0.15
288	WPR B	Dairy (milk and milk products)	0.05	0.1	0.3
288	WPR B	Fruits and Nuts	0.03	0.05	0.1
288	WPR B	Goat, lamb and other small ruminants' meat	0.05	0.2	0.3
288	WPR B	Other foods	1e-08	1e-06	0.01
288	WPR B	Pork	0.02	0.05	0.15
288	WPR B	Poultry Meat	0.4	0.5	0.9
288	WPR B	Vegetables (excluding dried legumes)	0.03	0.05	0.1
297	WPR B	Beef	1e-08	0.05	0.06
297	WPR B	Dairy (milk and milk products)	1e-08	0.05	0.1
297	WPR B	Fruits and Nuts	0.01	0.02	0.06
297	WPR B	Goat, lamb and other small ruminants' meat	0.02	0.04	0.1
297	WPR B	Other foods	1e-08	1e-06	1e-05
297	WPR B	Pork	0.01	0.02	0.05
297	WPR B	Poultry Meat	0.6	0.8	0.95
297	WPR B	Vegetables (excluding dried legumes)	0.02	0.02	0.1
145	WPR B	Beef	0.03	0.05	0.08
145	WPR B	Goat, lamb and other small ruminants' meat	1e-08	1e-06	1e-05
145	WPR B	Dairy (milk and milk products)	0.1	0.15	0.25
145	WPR B	Pork	1e-08	1e-06	1e-05
145	WPR B	Poultry Meat	0.6	0.7	0.8
145	WPR B	Vegetables (excluding dried legumes)	0.05	0.1	0.15
145	WPR B	Fruits and Nuts	1e-08	1e-06	1e-05
145	WPR B	Other foods	1e-08	1e-06	1e-05

## Sheet: Crypto
Cryptosporidium spp.
Expert ID	Region	Food category	5th percentile	50th percentile	95th percentile
47	AFR D	Dairy (milk and milk products)	0.05	0.3	0.6		This file contains anonymized data that was used in estimating results presented in:
47	AFR D	Vegetables (excluding dried legumes)	0.05	0.3	0.6
47	AFR D	Fruits and Nuts	0.05	0.3	0.6		Hoffmann et al., Estimates of the relative role of specific food categories in causing major foodborne enteric
47	AFR D	Other foods	0.02	0.1	0.4		diseases around the world: Findings from a World Health Organization structured expert elicitation.
47	AFR E	Dairy (milk and milk products)	0.05	0.3	0.6		PlosOne ___date___ and url.
47	AFR E	Vegetables (excluding dried legumes)	0.05	0.3	0.6
47	AFR E	Fruits and Nuts	0.05	0.3	0.6
47	AFR E	Other foods	0.02	0.1	0.4
47	AMR A	Dairy (milk and milk products)	0.02	0.15	0.4
47	AMR A	Vegetables (excluding dried legumes)	0.05	0.35	0.9
47	AMR A	Fruits and Nuts	0.05	0.5	0.9
47	AMR A	Other foods	0	0.01	0.1
47	AMR B	Dairy (milk and milk products)	0.02	0.15	0.4
47	AMR B	Vegetables (excluding dried legumes)	0.05	0.35	0.9
47	AMR B	Fruits and Nuts	0.05	0.5	0.9
47	AMR B	Other foods	0	0.01	0.1
47	AMR D	Dairy (milk and milk products)	0.02	0.15	0.4
47	AMR D	Vegetables (excluding dried legumes)	0.05	0.35	0.9
47	AMR D	Fruits and Nuts	0.05	0.5	0.9
47	AMR D	Other foods	0	0.01	0.1
47	EUR A	Dairy (milk and milk products)	0.02	0.1	0.4
47	EUR A	Vegetables (excluding dried legumes)	0.2	0.75	1
47	EUR A	Fruits and Nuts	0.02	0.1	0.5
47	EUR A	Other foods	0.01	0.05	0.2
47	EUR B	Dairy (milk and milk products)	0.02	0.1	0.4
47	EUR B	Vegetables (excluding dried legumes)	0.2	0.75	1
47	EUR B	Fruits and Nuts	0.02	0.1	0.5
47	EUR B	Other foods	0.01	0.05	0.2
47	EUR C	Dairy (milk and milk products)	0.02	0.1	0.4
47	EUR C	Vegetables (excluding dried legumes)	0.2	0.75	1
47	EUR C	Fruits and Nuts	0.02	0.05	0.5
47	EUR C	Other foods	0.01	0.1	0.2
47	EMR B	Dairy (milk and milk products)	0.05	0.3	0.6
47	EMR B	Vegetables (excluding dried legumes)	0.05	0.3	0.6
47	EMR B	Fruits and Nuts	0.05	0.3	0.6
47	EMR B	Other foods	0.02	0.1	0.4
47	EMR D	Dairy (milk and milk products)	0.05	0.3	0.6
47	EMR D	Vegetables (excluding dried legumes)	0.05	0.3	0.6
47	EMR D	Fruits and Nuts	0.05	0.3	0.6
47	EMR D	Other foods	0.02	0.1	0.4
47	SEAR B	Dairy (milk and milk products)	0.05	0.2	0.5
47	SEAR B	Vegetables (excluding dried legumes)	0.1	0.5	0.95
47	SEAR B	Fruits and Nuts	0.01	0.1	0.4
47	SEAR B	Other foods	0.02	0.2	0.5
47	SEAR D	Dairy (milk and milk products)	0.05	0.3	0.6
47	SEAR D	Vegetables (excluding dried legumes)	0.05	0.3	0.6
47	SEAR D	Fruits and Nuts	0.05	0.3	0.6
47	SEAR D	Other foods	0.02	0.1	0.4
47	WPR A	Dairy (milk and milk products)	0	0.01	0.2
47	WPR A	Vegetables (excluding dried legumes)	0.2	0.75	1
47	WPR A	Fruits and Nuts	0	0.01	0.2
47	WPR A	Other foods	0.05	0.25	0.5
47	WPR B	Dairy (milk and milk products)	0.05	0.3	0.8
47	WPR B	Vegetables (excluding dried legumes)	0.05	0.3	0.7
47	WPR B	Fruits and Nuts	0.05	0.3	0.7
47	WPR B	Other foods	0.02	0.1	0.3
49	AFR D	Dairy (milk and milk products)	0.02	0.1	0.2
49	AFR D	Vegetables (excluding dried legumes)	0.3	0.4	0.7
49	AFR D	Fruits and Nuts	0.3	0.5	0.7
49	AFR D	Other foods
49	AFR E	Dairy (milk and milk products)	0.02	0.1	0.2
49	AFR E	Vegetables (excluding dried legumes)	0.3	0.4	0.7
49	AFR E	Fruits and Nuts	0.3	0.5	0.7
49	AFR E	Other foods
49	AMR A	Dairy (milk and milk products)	0	0.01	0.03
49	AMR A	Vegetables (excluding dried legumes)	0.3	0.5	0.7
49	AMR A	Fruits and Nuts	0.3	0.5	0.7
49	AMR A	Other foods
49	AMR B	Dairy (milk and milk products)	0.01	0.03	0.05
49	AMR B	Vegetables (excluding dried legumes)	0.3	0.45	0.7
49	AMR B	Fruits and Nuts	0.3	0.55	0.7
49	AMR B	Other foods
49	AMR D	Dairy (milk and milk products)	0.02	0.05	0.07
49	AMR D	Vegetables (excluding dried legumes)	0.3	0.45	0.7
49	AMR D	Fruits and Nuts	0.3	0.55	0.7
49	AMR D	Other foods
49	EUR A	Dairy (milk and milk products)	0.01	0.02	0.05
49	EUR A	Vegetables (excluding dried legumes)	0.3	0.5	0.7
49	EUR A	Fruits and Nuts	0.3	0.5	0.7
49	EUR A	Other foods
49	EUR B	Dairy (milk and milk products)	0.01	0.02	0.05
49	EUR B	Vegetables (excluding dried legumes)	0.3	0.5	0.7
49	EUR B	Fruits and Nuts	0.3	0.5	0.7
49	EUR B	Other foods
49	EUR C	Dairy (milk and milk products)	0.01	0.03	0.07
49	EUR C	Vegetables (excluding dried legumes)	0.3	0.5	0.7
49	EUR C	Fruits and Nuts	0.3	0.5	0.7
49	EUR C	Other foods
49	EMR B	Dairy (milk and milk products)	0.01	0.02	0.05
49	EMR B	Vegetables (excluding dried legumes)	0.3	0.45	0.7
49	EMR B	Fruits and Nuts	0.3	0.55	0.7
49	EMR B	Other foods
49	EMR D	Dairy (milk and milk products)	0.02	0.05	0.07
49	EMR D	Vegetables (excluding dried legumes)	0.3	0.45	0.7
49	EMR D	Fruits and Nuts	0.3	0.5	0.7
49	EMR D	Other foods
49	SEAR B	Dairy (milk and milk products)	0.01	0.03	0.05
49	SEAR B	Vegetables (excluding dried legumes)	0.3	0.45	0.7
49	SEAR B	Fruits and Nuts	0.3	0.5	0.7
49	SEAR B	Other foods
49	SEAR D	Dairy (milk and milk products)	0.02	0.1	0.2
49	SEAR D	Vegetables (excluding dried legumes)	0.3	0.4	0.7
49	SEAR D	Fruits and Nuts	0.3	0.5	0.7
49	SEAR D	Other foods
49	WPR A	Dairy (milk and milk products)	0	0.01	0.03
49	WPR A	Vegetables (excluding dried legumes)	0.3	0.5	0.7
49	WPR A	Fruits and Nuts	0.3	0.5	0.7
49	WPR A	Other foods
49	WPR B	Dairy (milk and milk products)	0.02	0.05	0.1
49	WPR B	Vegetables (excluding dried legumes)	0.3	0.45	0.7
49	WPR B	Fruits and Nuts	0.3	0.5	0.7
49	WPR B	Other foods
50	AFR D	Dairy (milk and milk products)	0.02	0.05	0.07
50	AFR D	Vegetables (excluding dried legumes)	0.8	0.88	0.95
50	AFR D	Fruits and Nuts	0.03	0.05	0.1
50	AFR D	Other foods	0.01	0.02	0.03
50	AFR E	Dairy (milk and milk products)	0.02	0.05	0.07
50	AFR E	Vegetables (excluding dried legumes)	0.8	0.88	0.9
50	AFR E	Fruits and Nuts	0.02	0.05	0.1
50	AFR E	Other foods	0.01	0.02	0.03
50	AMR A	Dairy (milk and milk products)	0.01	0.02	0.05
50	AMR A	Vegetables (excluding dried legumes)	0.75	0.81	0.9
50	AMR A	Fruits and Nuts	0.1	0.15	0.2
50	AMR A	Other foods	0.01	0.02	0.03
50	AMR B	Dairy (milk and milk products)	0.05	0.06	0.09
50	AMR B	Vegetables (excluding dried legumes)	0.75	0.79	0.85
50	AMR B	Fruits and Nuts	0.1	0.13	0.25
50	AMR B	Other foods	0.01	0.02	0.03
50	AMR D	Dairy (milk and milk products)	0.04	0.05	0.09
50	AMR D	Vegetables (excluding dried legumes)	0.7	0.8	0.85
50	AMR D	Fruits and Nuts	0.1	0.13	0.25
50	AMR D	Other foods	0.01	0.02	0.03
50	EUR A	Dairy (milk and milk products)	0.01	0.02	0.03
50	EUR A	Vegetables (excluding dried legumes)	0.75	0.83	0.85
50	EUR A	Fruits and Nuts	0.1	0.13	0.25
50	EUR A	Other foods	0.01	0.02	0.03
50	EUR B	Dairy (milk and milk products)	0.01	0.05	0.07
50	EUR B	Vegetables (excluding dried legumes)	0.75	0.85	0.9
50	EUR B	Fruits and Nuts	0.07	0.1	0.2
50	EUR B	Other foods	0.01	0.02	0.03
50	EUR C	Dairy (milk and milk products)	0.01	0.05	0.07
50	EUR C	Vegetables (excluding dried legumes)	0.75	0.8	0.9
50	EUR C	Fruits and Nuts	0.1	0.13	0.2
50	EUR C	Other foods	0.01	0.02	0.03
50	EMR B	Dairy (milk and milk products)	0.03	0.05	0.07
50	EMR B	Vegetables (excluding dried legumes)	0.75	0.83	0.9
50	EMR B	Fruits and Nuts	0.1	0.1	0.15
50	EMR B	Other foods	0.01	0.02	0.03
50	EMR D	Dairy (milk and milk products)	0.01	0.05	0.07
50	EMR D	Vegetables (excluding dried legumes)	0.8	0.83	0.9
50	EMR D	Fruits and Nuts	0.05	0.1	0.12
50	EMR D	Other foods	0.01	0.02	0.03
50	SEAR B	Dairy (milk and milk products)	0.02	0.05	0.07
50	SEAR B	Vegetables (excluding dried legumes)	0.7	0.8	0.85
50	SEAR B	Fruits and Nuts	0.1	0.13	0.2
50	SEAR B	Other foods	0.01	0.02	0.03
50	SEAR D	Dairy (milk and milk products)	0.01	0.02	0.03
50	SEAR D	Vegetables (excluding dried legumes)	0.8	0.84	0.9
50	SEAR D	Fruits and Nuts	0.1	0.12	0.15
50	SEAR D	Other foods	0.01	0.02	0.03
50	WPR A	Dairy (milk and milk products)	0.01	0.02	0.03
50	WPR A	Vegetables (excluding dried legumes)	0.75	0.8	0.85
50	WPR A	Fruits and Nuts	0.1	0.16	0.2
50	WPR A	Other foods	0.01	0.02	0.03
50	WPR B	Dairy (milk and milk products)	0.01	0.02	0.03
50	WPR B	Vegetables (excluding dried legumes)	0.75	0.83	0.9
50	WPR B	Fruits and Nuts	0.1	0.13	0.2
50	WPR B	Other foods	0.01	0.02	0.03
53	AFR D	Dairy (milk and milk products)	0.05	0.16	0.3
53	AFR D	Vegetables (excluding dried legumes)	0.1	0.4	0.5
53	AFR D	Fruits and Nuts	0.1	0.4	0.5
53	AFR D	Other foods	0.02	0.04	0.06
53	AFR E	Dairy (milk and milk products)	0.1	0.27	0.4
53	AFR E	Vegetables (excluding dried legumes)	0.1	0.4	0.6
53	AFR E	Fruits and Nuts	0.1	0.3	0.5
53	AFR E	Other foods	0.02	0.03	0.04
53	AMR A	Dairy (milk and milk products)	0.05	0.08	0.2
53	AMR A	Vegetables (excluding dried legumes)	0.3	0.45	0.6
53	AMR A	Fruits and Nuts	0.3	0.45	0.6
53	AMR A	Other foods	0.01	0.02	0.03
53	AMR B	Dairy (milk and milk products)	0.05	0.08	0.15
53	AMR B	Vegetables (excluding dried legumes)	0.3	0.4	0.5
53	AMR B	Fruits and Nuts	0.3	0.5	0.6
53	AMR B	Other foods	0.01	0.02	0.03
53	AMR D	Dairy (milk and milk products)	0.05	0.08	0.15
53	AMR D	Vegetables (excluding dried legumes)	0.3	0.5	0.6
53	AMR D	Fruits and Nuts	0.3	0.4	0.5
53	AMR D	Other foods	0.01	0.02	0.03
53	EUR A	Dairy (milk and milk products)	0.1	0.17	0.4
53	EUR A	Vegetables (excluding dried legumes)	0.2	0.4	0.6
53	EUR A	Fruits and Nuts	0.2	0.4	0.6
53	EUR A	Other foods	0.01	0.03	0.05
53	EUR B	Dairy (milk and milk products)	0.1	0.17	0.4
53	EUR B	Vegetables (excluding dried legumes)	0.2	0.4	0.6
53	EUR B	Fruits and Nuts	0.2	0.4	0.6
53	EUR B	Other foods	0.01	0.03	0.05
53	EUR C	Dairy (milk and milk products)	0.1	0.27	0.5
53	EUR C	Vegetables (excluding dried legumes)	0.15	0.35	0.5
53	EUR C	Fruits and Nuts	0.15	0.35	0.5
53	EUR C	Other foods	0.01	0.03	0.05
53	EMR B	Dairy (milk and milk products)	0.1	0.27	0.55
53	EMR B	Vegetables (excluding dried legumes)	0.2	0.35	0.5
53	EMR B	Fruits and Nuts	0.2	0.35	0.5
53	EMR B	Other foods	0.01	0.03	0.05
53	EMR D	Dairy (milk and milk products)	0.1	0.26	0.5
53	EMR D	Vegetables (excluding dried legumes)	0.2	0.35	0.4
53	EMR D	Fruits and Nuts	0.2	0.35	0.4
53	EMR D	Other foods	0.01	0.04	0.06
53	SEAR B	Dairy (milk and milk products)	0.1	0.18	0.3
53	SEAR B	Vegetables (excluding dried legumes)	0.2	0.4	0.5
53	SEAR B	Fruits and Nuts	0.2	0.4	0.5
53	SEAR B	Other foods	0.01	0.02	0.03
53	SEAR D	Dairy (milk and milk products)	0.1	0.18	0.3
53	SEAR D	Vegetables (excluding dried legumes)	0.15	0.4	0.6
53	SEAR D	Fruits and Nuts	0.2	0.4	0.6
53	SEAR D	Other foods	0.01	0.02	0.03
53	WPR A	Dairy (milk and milk products)	0.1	0.18	0.3
53	WPR A	Vegetables (excluding dried legumes)	0.2	0.4	0.5
53	WPR A	Fruits and Nuts	0.2	0.4	0.5
53	WPR A	Other foods	0.01	0.02	0.03
53	WPR B	Dairy (milk and milk products)	0.1	0.18	0.3
53	WPR B	Vegetables (excluding dried legumes)	0.2	0.4	0.5
53	WPR B	Fruits and Nuts	0.2	0.4	0.5
53	WPR B	Other foods	0.01	0.02	0.03
55	AFR D	Dairy (milk and milk products)	0	0.01	0.05
55	AFR D	Vegetables (excluding dried legumes)	0.15	0.8	0.95
55	AFR D	Fruits and Nuts	0.05	0.2	0.8
55	AFR D	Other foods	0	0	0
55	AFR E	Dairy (milk and milk products)	0	0.01	0.05
55	AFR E	Vegetables (excluding dried legumes)	0.15	0.8	0.95
55	AFR E	Fruits and Nuts	0.05	0.2	0.8
55	AFR E	Other foods	0	0	0
55	AMR A	Dairy (milk and milk products)	0	0.01	0.05
55	AMR A	Vegetables (excluding dried legumes)	0.15	0.85	0.95
55	AMR A	Fruits and Nuts	0.05	0.15	0.5
55	AMR A	Other foods	0	0.01	0.05
55	AMR B	Dairy (milk and milk products)	0	0.01	0.05
55	AMR B	Vegetables (excluding dried legumes)	0.15	0.85	0.95
55	AMR B	Fruits and Nuts	0.05	0.15	0.5
55	AMR B	Other foods	0	0.01	0.03
55	AMR D	Dairy (milk and milk products)	0	0.01	0.05
55	AMR D	Vegetables (excluding dried legumes)	0.15	0.85	0.95
55	AMR D	Fruits and Nuts	0.05	0.15	0.5
55	AMR D	Other foods	0	0.01	0.03
55	EUR A	Dairy (milk and milk products)	0	0.01	0.05
55	EUR A	Vegetables (excluding dried legumes)	0.15	0.85	0.95
55	EUR A	Fruits and Nuts	0.05	0.15	0.5
55	EUR A	Other foods	0	0.01	0.05
55	EUR B	Dairy (milk and milk products)	0	0.01	0.05
55	EUR B	Vegetables (excluding dried legumes)	0.15	0.85	0.95
55	EUR B	Fruits and Nuts	0.05	0.15	0.5
55	EUR B	Other foods	0	0.01	0.03
55	EUR C	Dairy (milk and milk products)	0	0.02	0.05
55	EUR C	Vegetables (excluding dried legumes)	0.15	0.85	0.95
55	EUR C	Fruits and Nuts	0.05	0.15	0.5
55	EUR C	Other foods	0	0.01	0.03
55	EMR B	Dairy (milk and milk products)	0	0.02	0.05
55	EMR B	Vegetables (excluding dried legumes)	0.15	0.85	0.95
55	EMR B	Fruits and Nuts	0.05	0.15	0.5
55	EMR B	Other foods	0	0.01	0.03
55	EMR D	Dairy (milk and milk products)	0	0.01	0.02
55	EMR D	Vegetables (excluding dried legumes)	0.25	0.85	0.95
55	EMR D	Fruits and Nuts	0.05	0.15	0.5
55	EMR D	Other foods	0	0.01	0.02
55	SEAR B	Dairy (milk and milk products)	0	0.01	0.02
55	SEAR B	Vegetables (excluding dried legumes)	0.25	0.85	0.95
55	SEAR B	Fruits and Nuts	0.05	0.15	0.5
55	SEAR B	Other foods	0	0.01	0.03
55	SEAR D	Dairy (milk and milk products)	0	0.01	0.02
55	SEAR D	Vegetables (excluding dried legumes)	0.25	0.85	0.95
55	SEAR D	Fruits and Nuts	0.05	0.15	0.5
55	SEAR D	Other foods	0	0.01	0.02
55	WPR A	Dairy (milk and milk products)	0	0.01	0.02
55	WPR A	Vegetables (excluding dried legumes)	0.25	0.85	0.95
55	WPR A	Fruits and Nuts	0.05	0.15	0.5
55	WPR A	Other foods	0	0.01	0.02
55	WPR B	Dairy (milk and milk products)	0	0.01	0.02
55	WPR B	Vegetables (excluding dried legumes)	0.25	0.85	0.95
55	WPR B	Fruits and Nuts	0.05	0.15	0.5
55	WPR B	Other foods	0	0.01	0.02
200	AFR D	Dairy (milk and milk products)	0.1	0.3	0.4
200	AFR D	Vegetables (excluding dried legumes)	0.2	0.45	0.6
200	AFR D	Fruits and Nuts	0.1	0.25	0.45
200	AFR D	Other foods	0	0	0
200	AFR E	Dairy (milk and milk products)	0.1	0.3	0.4
200	AFR E	Vegetables (excluding dried legumes)	0.2	0.45	0.6
200	AFR E	Fruits and Nuts	0.1	0.25	0.45
200	AFR E	Other foods	0	0	0
200	AMR A	Dairy (milk and milk products)	0.05	0.2	0.33
200	AMR A	Vegetables (excluding dried legumes)	0.2	0.5	0.6
200	AMR A	Fruits and Nuts	0.1	0.3	0.45
200	AMR A	Other foods	0	0	0
200	AMR B	Dairy (milk and milk products)	0.05	0.2	0.33
200	AMR B	Vegetables (excluding dried legumes)	0.2	0.5	0.6
200	AMR B	Fruits and Nuts	0.1	0.3	0.45
200	AMR B	Other foods	0	0	0
200	AMR D	Dairy (milk and milk products)	0.1	0.3	0.4
200	AMR D	Vegetables (excluding dried legumes)	0.2	0.45	0.6
200	AMR D	Fruits and Nuts	0.1	0.25	0.45
200	AMR D	Other foods	0	0	0
200	EUR A	Dairy (milk and milk products)	0.05	0.2	0.33
200	EUR A	Vegetables (excluding dried legumes)	0.2	0.5	0.6
200	EUR A	Fruits and Nuts	0.1	0.3	0.45
200	EUR A	Other foods	0	0	0
200	EUR B	Dairy (milk and milk products)	0.05	0.2	0.33
200	EUR B	Vegetables (excluding dried legumes)	0.2	0.5	0.6
200	EUR B	Fruits and Nuts	0.1	0.3	0.45
200	EUR B	Other foods	0	0	0
200	EUR C	Dairy (milk and milk products)	0.05	0.2	0.33
200	EUR C	Vegetables (excluding dried legumes)	0.2	0.5	0.6
200	EUR C	Fruits and Nuts	0.1	0.3	0.45
200	EUR C	Other foods	0	0	0
200	EMR B	Dairy (milk and milk products)	0.05	0.2	0.33
200	EMR B	Vegetables (excluding dried legumes)	0.2	0.5	0.6
200	EMR B	Fruits and Nuts	0.1	0.3	0.45
200	EMR B	Other foods	0	0	0
200	EMR D	Dairy (milk and milk products)	0.1	0.3	0.4
200	EMR D	Vegetables (excluding dried legumes)	0.2	0.45	0.6
200	EMR D	Fruits and Nuts	0.1	0.25	0.45
200	EMR D	Other foods	0	0	0
200	SEAR B	Dairy (milk and milk products)	0.05	0.2	0.33
200	SEAR B	Vegetables (excluding dried legumes)	0.2	0.5	0.6
200	SEAR B	Fruits and Nuts	0.1	0.3	0.45
200	SEAR B	Other foods	0	0	0
200	SEAR D	Dairy (milk and milk products)	0.1	0.3	0.4
200	SEAR D	Vegetables (excluding dried legumes)	0.2	0.45	0.6
200	SEAR D	Fruits and Nuts	0.1	0.25	0.45
200	SEAR D	Other foods	0	0	0
200	WPR A	Dairy (milk and milk products)	0.05	0.2	0.33
200	WPR A	Vegetables (excluding dried legumes)	0.2	0.5	0.6
200	WPR A	Fruits and Nuts	0.1	0.3	0.45
200	WPR A	Other foods	0	0	0
200	WPR B	Dairy (milk and milk products)	0.1	0.3	0.4
200	WPR B	Vegetables (excluding dried legumes)	0.2	0.45	0.6
200	WPR B	Fruits and Nuts	0.1	0.25	0.45
200	WPR B	Other foods	0	0	0
267	AFR D	Dairy (milk and milk products)
267	AFR D	Vegetables (excluding dried legumes)
267	AFR D	Fruits and Nuts
267	AFR D	Other foods
267	AFR E	Dairy (milk and milk products)
267	AFR E	Vegetables (excluding dried legumes)
267	AFR E	Fruits and Nuts
267	AFR E	Other foods
267	AMR A	Dairy (milk and milk products)	0.01	0.05	0.09
267	AMR A	Vegetables (excluding dried legumes)	0.2	0.65	0.8
267	AMR A	Fruits and Nuts	0.18	0.3	0.48
267	AMR A	Other foods	0	0	0
267	AMR B	Dairy (milk and milk products)	0.05	0.1	0.15
267	AMR B	Vegetables (excluding dried legumes)	0.35	0.65	0.85
267	AMR B	Fruits and Nuts	0.15	0.25	0.48
267	AMR B	Other foods	0	0	0
267	AMR D	Dairy (milk and milk products)	0.05	0.1	0.15
267	AMR D	Vegetables (excluding dried legumes)	0.41	0.7	0.89
267	AMR D	Fruits and Nuts	0.15	0.2	0.48
267	AMR D	Other foods	0	0	0
267	EUR A	Dairy (milk and milk products)
267	EUR A	Vegetables (excluding dried legumes)
267	EUR A	Fruits and Nuts
267	EUR A	Other foods
267	EUR B	Dairy (milk and milk products)
267	EUR B	Vegetables (excluding dried legumes)
267	EUR B	Fruits and Nuts
267	EUR B	Other foods
267	EUR C	Dairy (milk and milk products)
267	EUR C	Vegetables (excluding dried legumes)
267	EUR C	Fruits and Nuts
267	EUR C	Other foods
267	EMR B	Dairy (milk and milk products)
267	EMR B	Vegetables (excluding dried legumes)
267	EMR B	Fruits and Nuts
267	EMR B	Other foods
267	EMR D	Dairy (milk and milk products)
267	EMR D	Vegetables (excluding dried legumes)
267	EMR D	Fruits and Nuts
267	EMR D	Other foods
267	SEAR B	Dairy (milk and milk products)
267	SEAR B	Vegetables (excluding dried legumes)
267	SEAR B	Fruits and Nuts
267	SEAR B	Other foods
267	SEAR D	Dairy (milk and milk products)
267	SEAR D	Vegetables (excluding dried legumes)
267	SEAR D	Fruits and Nuts
267	SEAR D	Other foods
267	WPR A	Dairy (milk and milk products)
267	WPR A	Vegetables (excluding dried legumes)
267	WPR A	Fruits and Nuts
267	WPR A	Other foods
267	WPR B	Dairy (milk and milk products)
267	WPR B	Vegetables (excluding dried legumes)
267	WPR B	Fruits and Nuts
267	WPR B	Other foods
276	AFR D	Dairy (milk and milk products)	0.01	0.1	0.2
276	AFR D	Vegetables (excluding dried legumes)	0.4	0.8	0.95
276	AFR D	Fruits and Nuts	0.01	0.1	0.3
276	AFR D	Other foods	0.01	0.05	0.2
276	AFR E	Dairy (milk and milk products)	0.01	0.1	0.2
276	AFR E	Vegetables (excluding dried legumes)	0.4	0.8	0.95
276	AFR E	Fruits and Nuts	0.01	0.1	0.3
276	AFR E	Other foods	0.01	0.05	0.2
276	AMR A	Dairy (milk and milk products)	0	0.01	0.03
276	AMR A	Vegetables (excluding dried legumes)	0.4	0.5	0.7
276	AMR A	Fruits and Nuts	0.3	0.4	0.5
276	AMR A	Other foods	0.01	0.05	0.1
276	AMR B	Dairy (milk and milk products)	0.05	0.1	0.15
276	AMR B	Vegetables (excluding dried legumes)	0.3	0.4	0.5
276	AMR B	Fruits and Nuts	0.3	0.4	0.5
276	AMR B	Other foods	0.01	0.1	0.15
276	AMR D	Dairy (milk and milk products)	0.05	0.2	0.3
276	AMR D	Vegetables (excluding dried legumes)	0.2	0.35	0.6
276	AMR D	Fruits and Nuts	0.2	0.35	0.6
276	AMR D	Other foods	0.01	0.1	0.2
276	EUR A	Dairy (milk and milk products)	0	0.01	0.03
276	EUR A	Vegetables (excluding dried legumes)	0.4	0.5	0.7
276	EUR A	Fruits and Nuts	0.3	0.4	0.5
276	EUR A	Other foods	0.01	0.05	0.1
276	EUR B	Dairy (milk and milk products)	0.01	0.1	0.15
276	EUR B	Vegetables (excluding dried legumes)	0.3	0.45	0.7
276	EUR B	Fruits and Nuts	0.3	0.4	0.6
276	EUR B	Other foods	0.01	0.05	0.2
276	EUR C	Dairy (milk and milk products)	0.01	0.1	0.15
276	EUR C	Vegetables (excluding dried legumes)	0.3	0.45	0.7
276	EUR C	Fruits and Nuts	0.3	0.4	0.6
276	EUR C	Other foods	0.01	0.05	0.2
276	EMR B	Dairy (milk and milk products)	0.01	0.02	0.15
276	EMR B	Vegetables (excluding dried legumes)	0.3	0.45	0.7
276	EMR B	Fruits and Nuts	0.3	0.4	0.6
276	EMR B	Other foods	0.01	0.05	0.15
276	EMR D	Dairy (milk and milk products)	0.01	0.1	0.15
276	EMR D	Vegetables (excluding dried legumes)	0.3	0.45	0.7
276	EMR D	Fruits and Nuts	0.3	0.4	0.6
276	EMR D	Other foods	0.01	0.05	0.2
276	SEAR B	Dairy (milk and milk products)	0.01	0.1	0.15
276	SEAR B	Vegetables (excluding dried legumes)	0.3	0.45	0.7
276	SEAR B	Fruits and Nuts	0.3	0.4	0.6
276	SEAR B	Other foods	0.01	0.05	0.2
276	SEAR D	Dairy (milk and milk products)	0.1	0.5	0.6
276	SEAR D	Vegetables (excluding dried legumes)	0.1	0.4	0.5
276	SEAR D	Fruits and Nuts	0.05	0.1	0.2
276	SEAR D	Other foods	0	0	0
276	WPR A	Dairy (milk and milk products)	0	0.01	0.03
276	WPR A	Vegetables (excluding dried legumes)	0.4	0.5	0.7
276	WPR A	Fruits and Nuts	0.3	0.4	0.5
276	WPR A	Other foods	0.01	0.05	0.1
276	WPR B	Dairy (milk and milk products)	0.01	0.1	0.15
276	WPR B	Vegetables (excluding dried legumes)	0.3	0.45	0.7
276	WPR B	Fruits and Nuts	0.3	0.4	0.6
276	WPR B	Other foods	0.01	0.05	0.2
277	AFR D	Dairy (milk and milk products)	0.3	0.4	0.6
277	AFR D	Vegetables (excluding dried legumes)	0.2	0.3	0.4
277	AFR D	Fruits and Nuts	0.15	0.3	0.4
277	AFR D	Other foods	0	0	0
277	AFR E	Dairy (milk and milk products)	0.3	0.4	0.6
277	AFR E	Vegetables (excluding dried legumes)	0.2	0.3	0.4
277	AFR E	Fruits and Nuts	0.15	0.3	0.4
277	AFR E	Other foods	0	0	0
277	AMR A	Dairy (milk and milk products)	0.08	0.1	0.2
277	AMR A	Vegetables (excluding dried legumes)	0.2	0.45	0.5
277	AMR A	Fruits and Nuts	0.15	0.45	0.6
277	AMR A	Other foods	0	0	0
277	AMR B	Dairy (milk and milk products)	0.3	0.4	0.6
277	AMR B	Vegetables (excluding dried legumes)	0.2	0.3	0.4
277	AMR B	Fruits and Nuts	0.15	0.3	0.4
277	AMR B	Other foods	0	0	0
277	AMR D	Dairy (milk and milk products)	0.3	0.4	0.6
277	AMR D	Vegetables (excluding dried legumes)	0.2	0.3	0.4
277	AMR D	Fruits and Nuts	0.15	0.3	0.4
277	AMR D	Other foods	0	0	0
277	EUR A	Dairy (milk and milk products)	0.08	0.2	0.4
277	EUR A	Vegetables (excluding dried legumes)	0.2	0.45	0.6
277	EUR A	Fruits and Nuts	0.15	0.35	0.45
277	EUR A	Other foods	0	0	0
277	EUR B	Dairy (milk and milk products)	0.3	0.4	0.6
277	EUR B	Vegetables (excluding dried legumes)	0.2	0.3	0.4
277	EUR B	Fruits and Nuts	0.15	0.3	0.4
277	EUR B	Other foods	0	0	0
277	EUR C	Dairy (milk and milk products)	0.3	0.4	0.6
277	EUR C	Vegetables (excluding dried legumes)	0.2	0.3	0.4
277	EUR C	Fruits and Nuts	0.15	0.3	0.4
277	EUR C	Other foods	0	0	0
277	EMR B	Dairy (milk and milk products)	0.3	0.4	0.6
277	EMR B	Vegetables (excluding dried legumes)	0.2	0.3	0.4
277	EMR B	Fruits and Nuts	0.15	0.3	0.4
277	EMR B	Other foods	0	0	0
277	EMR D	Dairy (milk and milk products)	0.3	0.4	0.6
277	EMR D	Vegetables (excluding dried legumes)	0.2	0.3	0.4
277	EMR D	Fruits and Nuts	0.15	0.3	0.4
277	EMR D	Other foods	0	0	0
277	SEAR B	Dairy (milk and milk products)	0.3	0.4	0.6
277	SEAR B	Vegetables (excluding dried legumes)	0.2	0.3	0.4
277	SEAR B	Fruits and Nuts	0.15	0.3	0.4
277	SEAR B	Other foods	0	0	0
277	SEAR D	Dairy (milk and milk products)	0.3	0.4	0.6
277	SEAR D	Vegetables (excluding dried legumes)	0.2	0.3	0.4
277	SEAR D	Fruits and Nuts	0.15	0.3	0.4
277	SEAR D	Other foods	0	0	0
277	WPR A	Dairy (milk and milk products)	0.05	0.1	0.2
277	WPR A	Vegetables (excluding dried legumes)	0.2	0.45	0.55
277	WPR A	Fruits and Nuts	0.2	0.45	0.6
277	WPR A	Other foods	0	0	0
277	WPR B	Dairy (milk and milk products)	0.3	0.4	0.6
277	WPR B	Vegetables (excluding dried legumes)	0.2	0.3	0.4
277	WPR B	Fruits and Nuts	0.15	0.3	0.4
277	WPR B	Other foods	0	0	0

## Sheet: Egranulosus
Echinococcus granulosus
Expert ID	Region	Food category	5th percentile	50th percentile	95th percentile
70	AFR D	Vegetables (excluding dried legumes)	0.6	0.8	0.9		This file contains anonymized data that was used in estimating results presented in:
70	AFR D	Fruits and Nuts	0.1	0.2	0.4
70	AFR D	Other foods	0	0	0		Hoffmann et al., Estimates of the relative role of specific food categories in causing major foodborne enteric
70	AFR E	Vegetables (excluding dried legumes)	0.6	0.8	0.9		diseases around the world: Findings from a World Health Organization structured expert elicitation.
70	AFR E	Fruits and Nuts	0.1	0.2	0.4		PlosOne ___date___ and url.
70	AFR E	Other foods	0	0	0
70	AMR A	Vegetables (excluding dried legumes)	0.6	0.8	0.9
70	AMR A	Fruits and Nuts	0.1	0.2	0.4
70	AMR A	Other foods	0	0	0
70	AMR B	Vegetables (excluding dried legumes)	0.6	0.8	0.9
70	AMR B	Fruits and Nuts	0.1	0.2	0.4
70	AMR B	Other foods	0	0	0
70	AMR D	Vegetables (excluding dried legumes)	0.6	0.8	0.9
70	AMR D	Fruits and Nuts	0.1	0.2	0.4
70	AMR D	Other foods	0	0	0
70	EUR A	Vegetables (excluding dried legumes)	0.6	0.8	0.9
70	EUR A	Fruits and Nuts	0.1	0.2	0.4
70	EUR A	Other foods	0	0	0
70	EUR B	Vegetables (excluding dried legumes)	0.6	0.8	0.9
70	EUR B	Fruits and Nuts	0.1	0.2	0.4
70	EUR B	Other foods	0	0	0
70	EUR C	Vegetables (excluding dried legumes)	0.6	0.8	0.9
70	EUR C	Fruits and Nuts	0.1	0.2	0.4
70	EUR C	Other foods	0	0	0
70	EMR B	Vegetables (excluding dried legumes)	0.6	0.8	0.9
70	EMR B	Fruits and Nuts	0.1	0.2	0.4
70	EMR B	Other foods	0	0	0
70	EMR D	Vegetables (excluding dried legumes)	0.6	0.8	0.9
70	EMR D	Fruits and Nuts	0.1	0.2	0.4
70	EMR D	Other foods	0	0	0
70	SEAR B	Vegetables (excluding dried legumes)	0.6	0.8	0.9
70	SEAR B	Fruits and Nuts	0.1	0.2	0.4
70	SEAR B	Other foods	0	0	0
70	SEAR D	Vegetables (excluding dried legumes)	0.6	0.8	0.9
70	SEAR D	Fruits and Nuts	0.1	0.2	0.4
70	SEAR D	Other foods	0	0	0
70	WPR A	Vegetables (excluding dried legumes)	0.6	0.8	0.9
70	WPR A	Fruits and Nuts	0.1	0.2	0.4
70	WPR A	Other foods	0	0	0
70	WPR B	Vegetables (excluding dried legumes)	0.6	0.8	0.9
70	WPR B	Fruits and Nuts	0.1	0.2	0.4
70	WPR B	Other foods	0	0	0
83	AFR D	Vegetables (excluding dried legumes)	0.8	0.95	0.97
83	AFR D	Fruits and Nuts	0.02	0.05	0.08
83	AFR D	Other foods	0	0	0
83	AFR E	Vegetables (excluding dried legumes)	0.85	0.93	0.95
83	AFR E	Fruits and Nuts	0.03	0.06	0.08
83	AFR E	Other foods	0	0	0
83	AMR A	Vegetables (excluding dried legumes)	0.22	0.3	0.38
83	AMR A	Fruits and Nuts	0.55	0.66	0.7
83	AMR A	Other foods	0	0	0
83	AMR B	Vegetables (excluding dried legumes)	0.45	0.52	0.58
83	AMR B	Fruits and Nuts	0	0	0
83	AMR B	Other foods	0.41	0.48	0.52
83	AMR D	Vegetables (excluding dried legumes)	0.42	0.5	0.59
83	AMR D	Fruits and Nuts	0	0	0
83	AMR D	Other foods	0.41	0.48	0.54
83	EUR A	Vegetables (excluding dried legumes)	0.25	0.33	0.38
83	EUR A	Fruits and Nuts	0	0	0
83	EUR A	Other foods	0.55	0.68	0.72
83	EUR B	Vegetables (excluding dried legumes)	0.7	0.76	0.81
83	EUR B	Fruits and Nuts	0	0	0
83	EUR B	Other foods	0.15	0.22	0.28
83	EUR C	Vegetables (excluding dried legumes)	0.59	0.68	0.76
83	EUR C	Fruits and Nuts	0.26	0.34	0.41
83	EUR C	Other foods	0	0	0
83	EMR B	Vegetables (excluding dried legumes)	0.84	0.89	0.92
83	EMR B	Fruits and Nuts	0	0	0
83	EMR B	Other foods	0.06	0.11	0.15
83	EMR D	Vegetables (excluding dried legumes)	0.84	0.92	0.94
83	EMR D	Fruits and Nuts	0.05	0.09	0.12
83	EMR D	Other foods	0	0	0
83	SEAR B	Vegetables (excluding dried legumes)	0.57	0.68	0.75
83	SEAR B	Fruits and Nuts	0.3	0.34	0.39
83	SEAR B	Other foods	0	0	0
83	SEAR D	Vegetables (excluding dried legumes)	0.8	0.85	0.91
83	SEAR D	Fruits and Nuts	0.12	0.16	0.19
83	SEAR D	Other foods	0	0	0
83	WPR A	Vegetables (excluding dried legumes)	0.72	0.78	0.82
83	WPR A	Fruits and Nuts	0.2	0.24	0.26
83	WPR A	Other foods	0	0	0
83	WPR B	Vegetables (excluding dried legumes)	0.88	0.92	0.94
83	WPR B	Fruits and Nuts	0.03	0.08	0.11
83	WPR B	Other foods	0	0	0
102	AFR D	Vegetables (excluding dried legumes)	0.9	0.95	1
102	AFR D	Fruits and Nuts	0	0	0
102	AFR D	Other foods	0	0.01	0.05
102	AFR E	Vegetables (excluding dried legumes)	0.9	0.95	1
102	AFR E	Fruits and Nuts	0	0	0
102	AFR E	Other foods	0	0.01	0.05
102	AMR A	Vegetables (excluding dried legumes)	0.9	0.95	1
102	AMR A	Fruits and Nuts	0	0	0
102	AMR A	Other foods	0	0	0
102	AMR B	Vegetables (excluding dried legumes)	0.9	0.95	1
102	AMR B	Fruits and Nuts	0	0	0
102	AMR B	Other foods	0	0	0
102	AMR D	Vegetables (excluding dried legumes)	0.9	0.95	0.99
102	AMR D	Fruits and Nuts	0	0	0
102	AMR D	Other foods	0	0.01	0.05
102	EUR A	Vegetables (excluding dried legumes)	0.9	0.95	1
102	EUR A	Fruits and Nuts	0	0	0
102	EUR A	Other foods	0	0	0
102	EUR B	Vegetables (excluding dried legumes)	0.85	0.9	0.99
102	EUR B	Fruits and Nuts	0	0.01	0.05
102	EUR B	Other foods	0	0.01	0.05
102	EUR C	Vegetables (excluding dried legumes)	0.85	0.95	0.99
102	EUR C	Fruits and Nuts	0	0	0
102	EUR C	Other foods	0	0.01	0.05
102	EMR B	Vegetables (excluding dried legumes)	0.85	0.9	0.99
102	EMR B	Fruits and Nuts	0	0.01	0.02
102	EMR B	Other foods	0.01	0.05	0.1
102	EMR D	Vegetables (excluding dried legumes)	0.85	0.9	0.99
102	EMR D	Fruits and Nuts	0	0.01	0.02
102	EMR D	Other foods	0.01	0.05	0.1
102	SEAR B	Vegetables (excluding dried legumes)	0	0	0
102	SEAR B	Fruits and Nuts	0	0	0
102	SEAR B	Other foods	0	0	0
102	SEAR D	Vegetables (excluding dried legumes)	0.9	0.95	1
102	SEAR D	Fruits and Nuts	0	0	0
102	SEAR D	Other foods	0	0.01	0.05
102	WPR A	Vegetables (excluding dried legumes)	0.9	0.95	1
102	WPR A	Fruits and Nuts	0	0	0
102	WPR A	Other foods	0	0	0
102	WPR B	Vegetables (excluding dried legumes)	0.9	0.95	1
102	WPR B	Fruits and Nuts	0	0	0
102	WPR B	Other foods	0	0.01	0.05
103	AFR D	Vegetables (excluding dried legumes)	0.5	0.7	0.8
103	AFR D	Fruits and Nuts	0.1	0.3	0.4
103	AFR D	Other foods	0	0	0.01
103	AFR E	Vegetables (excluding dried legumes)	0.5	0.7	0.8
103	AFR E	Fruits and Nuts	0.1	0.3	0.4
103	AFR E	Other foods	0	0	0.01
103	AMR A	Vegetables (excluding dried legumes)	0.5	0.8	0.9
103	AMR A	Fruits and Nuts	0.1	0.2	0.4
103	AMR A	Other foods	0	0	0.01
103	AMR B	Vegetables (excluding dried legumes)	0.4	0.7	0.8
103	AMR B	Fruits and Nuts	0.1	0.3	0.4
103	AMR B	Other foods	0	0	0.01
103	AMR D	Vegetables (excluding dried legumes)	0.4	0.8	0.9
103	AMR D	Fruits and Nuts	0.1	0.2	0.4
103	AMR D	Other foods	0	0	0.01
103	EUR A	Vegetables (excluding dried legumes)	0.5	0.8	0.9
103	EUR A	Fruits and Nuts	0.1	0.2	0.3
103	EUR A	Other foods	0	0	0.01
103	EUR B	Vegetables (excluding dried legumes)	0.6	0.8	0.9
103	EUR B	Fruits and Nuts	0.1	0.2	0.3
103	EUR B	Other foods	0	0	0.01
103	EUR C	Vegetables (excluding dried legumes)	0.5	0.7	0.85
103	EUR C	Fruits and Nuts	0.1	0.3	0.5
103	EUR C	Other foods	0	0	0.01
103	EMR B	Vegetables (excluding dried legumes)	0.6	0.8	0.9
103	EMR B	Fruits and Nuts	0.1	0.2	0.3
103	EMR B	Other foods	0	0	0.01
103	EMR D	Vegetables (excluding dried legumes)	0.45	0.7	0.9
103	EMR D	Fruits and Nuts	0.1	0.3	0.4
103	EMR D	Other foods	0	0	0.01
103	SEAR B	Vegetables (excluding dried legumes)	0.5	0.8	0.9
103	SEAR B	Fruits and Nuts	0.1	0.2	0.3
103	SEAR B	Other foods	0	0	0.01
103	SEAR D	Vegetables (excluding dried legumes)	0.6	0.8	0.9
103	SEAR D	Fruits and Nuts	0.1	0.2	0.3
103	SEAR D	Other foods	0	0	0.01
103	WPR A	Vegetables (excluding dried legumes)	0.6	0.8	0.9
103	WPR A	Fruits and Nuts	0.1	0.2	0.3
103	WPR A	Other foods	0	0	0.01
103	WPR B	Vegetables (excluding dried legumes)	0.6	0.8	0.9
103	WPR B	Fruits and Nuts	0.1	0.2	0.3
103	WPR B	Other foods	0	0	0.01
104	AFR D	Vegetables (excluding dried legumes)	0.1	0.75	0.85
104	AFR D	Fruits and Nuts	0.05	0.25	0.3
104	AFR D	Other foods	0	0	0
104	AFR E	Vegetables (excluding dried legumes)	0.25	0.85	0.95
104	AFR E	Fruits and Nuts	0.1	0.15	0.25
104	AFR E	Other foods	0	0	0
104	AMR A	Vegetables (excluding dried legumes)	0.05	0.65	0.75
104	AMR A	Fruits and Nuts	0.15	0.35	0.4
104	AMR A	Other foods	0	0	0
104	AMR B	Vegetables (excluding dried legumes)	0.1	0.75	0.8
104	AMR B	Fruits and Nuts	0.15	0.3	0.4
104	AMR B	Other foods	0	0	0
104	AMR D	Vegetables (excluding dried legumes)	0.1	0.75	0.8
104	AMR D	Fruits and Nuts	0.15	0.3	0.4
104	AMR D	Other foods	0	0	0
104	EUR A	Vegetables (excluding dried legumes)	0.05	0.7	0.8
104	EUR A	Fruits and Nuts	0.15	0.35	0.45
104	EUR A	Other foods	0	0	0
104	EUR B	Vegetables (excluding dried legumes)	0.1	0.75	0.85
104	EUR B	Fruits and Nuts	0.1	0.3	0.4
104	EUR B	Other foods	0	0	0
104	EUR C	Vegetables (excluding dried legumes)	0.15	0.7	0.85
104	EUR C	Fruits and Nuts	0.1	0.3	0.4
104	EUR C	Other foods	0	0	0
104	EMR B	Vegetables (excluding dried legumes)	0.15	0.75	0.8
104	EMR B	Fruits and Nuts	0.1	0.25	0.35
104	EMR B	Other foods	0	0	0
104	EMR D	Vegetables (excluding dried legumes)	0.2	0.75	0.85
104	EMR D	Fruits and Nuts	0.1	0.3	0.4
104	EMR D	Other foods	0	0	0
104	SEAR B	Vegetables (excluding dried legumes)	0.1	0.75	0.85
104	SEAR B	Fruits and Nuts	0.1	0.3	0.4
104	SEAR B	Other foods	0	0	0
104	SEAR D	Vegetables (excluding dried legumes)	0.15	0.8	0.9
104	SEAR D	Fruits and Nuts	0.1	0.25	0.3
104	SEAR D	Other foods	0	0	0
104	WPR A	Vegetables (excluding dried legumes)	0.15	0.7	0.85
104	WPR A	Fruits and Nuts	0.1	0.35	0.45
104	WPR A	Other foods	0	0	0
104	WPR B	Vegetables (excluding dried legumes)	0.2	0.8	0.9
104	WPR B	Fruits and Nuts	0.1	0.25	0.3
104	WPR B	Other foods	0	0	0
120	AFR D	Vegetables (excluding dried legumes)	0.3	0.45	0.7
120	AFR D	Fruits and Nuts	0.25	0.4	0.65
120	AFR D	Other foods	0.07	0.15	0.25
120	AFR E	Vegetables (excluding dried legumes)	0.22	0.37	0.55
120	AFR E	Fruits and Nuts	0.2	0.33	0.53
120	AFR E	Other foods	0.19	0.3	0.5
120	AMR A	Vegetables (excluding dried legumes)	0.3	0.45	0.7
120	AMR A	Fruits and Nuts	0.25	0.4	0.65
120	AMR A	Other foods	0.07	0.15	0.25
120	AMR B	Vegetables (excluding dried legumes)	0.3	0.45	0.7
120	AMR B	Fruits and Nuts	0.25	0.4	0.65
120	AMR B	Other foods	0.07	0.15	0.25
120	AMR D	Vegetables (excluding dried legumes)	0.3	0.45	0.7
120	AMR D	Fruits and Nuts	0.25	0.4	0.65
120	AMR D	Other foods	0.07	0.15	0.25
120	EUR A	Vegetables (excluding dried legumes)	0.3	0.45	0.7
120	EUR A	Fruits and Nuts	0.25	0.4	0.65
120	EUR A	Other foods	0.07	0.15	0.25
120	EUR B	Vegetables (excluding dried legumes)	0.3	0.45	0.7
120	EUR B	Fruits and Nuts	0.25	0.4	0.65
120	EUR B	Other foods	0.07	0.15	0.25
120	EUR C	Vegetables (excluding dried legumes)	0.3	0.45	0.7
120	EUR C	Fruits and Nuts	0.25	0.4	0.65
120	EUR C	Other foods	0.07	0.15	0.25
120	EMR B	Vegetables (excluding dried legumes)	0.3	0.45	0.7
120	EMR B	Fruits and Nuts	0.25	0.4	0.65
120	EMR B	Other foods	0.07	0.15	0.25
120	EMR D	Vegetables (excluding dried legumes)	0.3	0.45	0.7
120	EMR D	Fruits and Nuts	0.25	0.4	0.65
120	EMR D	Other foods	0.07	0.15	0.25
120	SEAR B	Vegetables (excluding dried legumes)	0.3	0.42	0.7
120	SEAR B	Fruits and Nuts	0.22	0.38	0.65
120	SEAR B	Other foods	0.1	0.2	0.35
120	SEAR D	Vegetables (excluding dried legumes)	0.3	0.45	0.7
120	SEAR D	Fruits and Nuts	0.25	0.4	0.65
120	SEAR D	Other foods	0.07	0.15	0.25
120	WPR A	Vegetables (excluding dried legumes)	0.3	0.45	0.7
120	WPR A	Fruits and Nuts	0.25	0.4	0.65
120	WPR A	Other foods	0.07	0.15	0.25
120	WPR B	Vegetables (excluding dried legumes)	0.3	0.42	0.7
120	WPR B	Fruits and Nuts	0.22	0.38	0.65
120	WPR B	Other foods	0.1	0.2	0.35

## Sheet: Emultilocularis
Echinococcus multilocularis
Expert ID	Region	Food category	5th percentile	50th percentile	95th percentile
70	AFR D	Vegetables (excluding dried legumes)	0.4	0.6	0.8		This file contains anonymized data that was used in estimating results presented in:
70	AFR D	Fruits and Nuts	0.2	0.4	0.6
70	AFR D	Other foods	0	1e-05	2e-05		Hoffmann et al., Estimates of the relative role of specific food categories in causing major foodborne enteric
70	AFR E	Vegetables (excluding dried legumes)	0.4	0.6	0.8		diseases around the world: Findings from a World Health Organization structured expert elicitation.
70	AFR E	Fruits and Nuts	0.2	0.4	0.6		PlosOne ___date___ and url.
70	AFR E	Other foods	0	1e-05	2e-05
70	AMR A	Vegetables (excluding dried legumes)	0.4	0.6	0.8
70	AMR A	Fruits and Nuts	0.2	0.4	0.6
70	AMR A	Other foods	0	1e-05	2e-05
70	AMR B	Vegetables (excluding dried legumes)	0.4	0.6	0.8
70	AMR B	Fruits and Nuts	0.2	0.4	0.6
70	AMR B	Other foods	0	1e-05	2e-05
70	AMR D	Vegetables (excluding dried legumes)	0.4	0.6	0.8
70	AMR D	Fruits and Nuts	0.2	0.4	0.6
70	AMR D	Other foods	0	1e-05	2e-05
70	EUR A	Vegetables (excluding dried legumes)	0.4	0.6	0.8
70	EUR A	Fruits and Nuts	0.2	0.4	0.6
70	EUR A	Other foods	0	1e-05	2e-05
70	EUR B	Vegetables (excluding dried legumes)	0.4	0.6	0.8
70	EUR B	Fruits and Nuts	0.2	0.4	0.6
70	EUR B	Other foods	0	1e-05	2e-05
70	EUR C	Vegetables (excluding dried legumes)	0.4	0.6	0.8
70	EUR C	Fruits and Nuts	0.2	0.4	0.6
70	EUR C	Other foods	0	1e-05	2e-05
70	EMR B	Vegetables (excluding dried legumes)	0.4	0.6	0.8
70	EMR B	Fruits and Nuts	0.2	0.4	0.6
70	EMR B	Other foods	0	1e-05	2e-05
70	EMR D	Vegetables (excluding dried legumes)	0.4	0.6	0.8
70	EMR D	Fruits and Nuts	0.2	0.4	0.6
70	EMR D	Other foods	0	1e-05	2e-05
70	SEAR B	Vegetables (excluding dried legumes)	0.4	0.6	0.8
70	SEAR B	Fruits and Nuts	0.2	0.4	0.6
70	SEAR B	Other foods	0	1e-05	2e-05
70	SEAR D	Vegetables (excluding dried legumes)	0.4	0.6	0.8
70	SEAR D	Fruits and Nuts	0.2	0.4	0.6
70	SEAR D	Other foods	0	1e-05	2e-05
70	WPR A	Vegetables (excluding dried legumes)	0.4	0.6	0.8
70	WPR A	Fruits and Nuts	0.2	0.4	0.6
70	WPR A	Other foods	0	1e-05	2e-05
70	WPR B	Vegetables (excluding dried legumes)	0.4	0.6	0.8
70	WPR B	Fruits and Nuts	0.2	0.4	0.6
70	WPR B	Other foods	0	1e-05	2e-05
83	AFR D	Vegetables (excluding dried legumes)	0.93	0.95	0.97
83	AFR D	Fruits and Nuts	0.02	0.05	0.07
83	AFR D	Other foods	0	0	0
83	AFR E	Vegetables (excluding dried legumes)	0.9	0.94	0.96
83	AFR E	Fruits and Nuts	0.03	0.06	0.08
83	AFR E	Other foods	0	0	0
83	AMR A	Vegetables (excluding dried legumes)	0.68	0.69	0.78
83	AMR A	Fruits and Nuts	0.19	0.29	0.33
83	AMR A	Other foods	0	0	0
83	AMR B	Vegetables (excluding dried legumes)	0.8	0.89	0.93
83	AMR B	Fruits and Nuts	0.04	0.1	0.15
83	AMR B	Other foods	0	0	0
83	AMR D	Vegetables (excluding dried legumes)	0.85	0.9	0.94
83	AMR D	Fruits and Nuts	0.05	0.1	0.12
83	AMR D	Other foods	0	0	0
83	EUR A	Vegetables (excluding dried legumes)	0.6	0.65	0.7
83	EUR A	Fruits and Nuts	0.28	0.34	0.38
83	EUR A	Other foods	0	0	0
83	EUR B	Vegetables (excluding dried legumes)	0.8	0.89	0.94
83	EUR B	Fruits and Nuts	0.05	0.09	0.13
83	EUR B	Other foods	0	0	0
83	EUR C	Vegetables (excluding dried legumes)	0.8	0.88	0.93
83	EUR C	Fruits and Nuts	0.09	0.13	0.17
83	EUR C	Other foods	0	0	0
83	EMR B	Vegetables (excluding dried legumes)	0.9	0.95	0.98
83	EMR B	Fruits and Nuts	0.02	0.05	0.07
83	EMR B	Other foods	0	0	0
83	EMR D	Vegetables (excluding dried legumes)	0.89	0.9	0.94
83	EMR D	Fruits and Nuts	0.05	0.09	0.13
83	EMR D	Other foods	0	0	0
83	SEAR B	Vegetables (excluding dried legumes)	0.6	0.67	0.74
83	SEAR B	Fruits and Nuts	0.28	0.35	0.39
83	SEAR B	Other foods	0	0	0
83	SEAR D	Vegetables (excluding dried legumes)	0.7	0.79	0.84
83	SEAR D	Fruits and Nuts	0.2	0.24	0.28
83	SEAR D	Other foods	0	0	0
83	WPR A	Vegetables (excluding dried legumes)	0.76	0.8	0.87
83	WPR A	Fruits and Nuts	0.14	0.2	0.26
83	WPR A	Other foods	0	0	0
83	WPR B	Vegetables (excluding dried legumes)	0.66	0.79	0.83
83	WPR B	Fruits and Nuts	0.2	0.24	0.28
83	WPR B	Other foods	0	0	0
102	AFR D	Vegetables (excluding dried legumes)	0	0	0
102	AFR D	Fruits and Nuts	0	0	0
102	AFR D	Other foods	0	0	0
102	AFR E	Vegetables (excluding dried legumes)	0	0	0
102	AFR E	Fruits and Nuts	0	0	0
102	AFR E	Other foods	0	0	0
102	AMR A	Vegetables (excluding dried legumes)	0.9	0.95	1
102	AMR A	Fruits and Nuts	0	0	0
102	AMR A	Other foods	0	0	0
102	AMR B	Vegetables (excluding dried legumes)	0	0	0
102	AMR B	Fruits and Nuts	0	0	0
102	AMR B	Other foods	0	0	0
102	AMR D	Vegetables (excluding dried legumes)	0	0	0
102	AMR D	Fruits and Nuts	0	0	0
102	AMR D	Other foods	0	0	0
102	EUR A	Vegetables (excluding dried legumes)	0.8	0.9	0.99
102	EUR A	Fruits and Nuts	0.05	0.1	0.2
102	EUR A	Other foods	0.01	0.05	0.1
102	EUR B	Vegetables (excluding dried legumes)	0.8	0.9	0.99
102	EUR B	Fruits and Nuts	0.01	0.05	0.1
102	EUR B	Other foods	0.05	0.1	0.15
102	EUR C	Vegetables (excluding dried legumes)	0.7	0.9	0.99
102	EUR C	Fruits and Nuts	0.01	0.05	0.1
102	EUR C	Other foods	0.05	0.1	0.15
102	EMR B	Vegetables (excluding dried legumes)	0	0	0
102	EMR B	Fruits and Nuts	0	0	0
102	EMR B	Other foods	0	0	0
102	EMR D	Vegetables (excluding dried legumes)	0	0	0
102	EMR D	Fruits and Nuts	0	0	0
102	EMR D	Other foods	0	0	0
102	SEAR B	Vegetables (excluding dried legumes)	0	0	0
102	SEAR B	Fruits and Nuts	0	0	0
102	SEAR B	Other foods	0	0	0
102	SEAR D	Vegetables (excluding dried legumes)	0	0	0
102	SEAR D	Fruits and Nuts	0	0	0
102	SEAR D	Other foods	0	0	0
102	WPR A	Vegetables (excluding dried legumes)	0	0	0
102	WPR A	Fruits and Nuts	0	0	0
102	WPR A	Other foods	0	0	0
102	WPR B	Vegetables (excluding dried legumes)	0.6	0.7	0.99
102	WPR B	Fruits and Nuts	0.01	0.05	0.1
102	WPR B	Other foods	0.01	0.05	0.1
103	AFR D	Vegetables (excluding dried legumes)	0	0	0
103	AFR D	Fruits and Nuts	0	0	0
103	AFR D	Other foods	0	0	0
103	AFR E	Vegetables (excluding dried legumes)	0	0	0
103	AFR E	Fruits and Nuts	0	0	0
103	AFR E	Other foods	0	0	0
103	AMR A	Vegetables (excluding dried legumes)	0.05	0.2	0.3
103	AMR A	Fruits and Nuts	0.5	0.8	0.9
103	AMR A	Other foods	0	0	0.01
103	AMR B	Vegetables (excluding dried legumes)	0	0	0
103	AMR B	Fruits and Nuts	0	0	0
103	AMR B	Other foods	0	0	0
103	AMR D	Vegetables (excluding dried legumes)	0	0	0
103	AMR D	Fruits and Nuts	0	0	0
103	AMR D	Other foods	0	0	0
103	EUR A	Vegetables (excluding dried legumes)	0.05	0.2	0.3
103	EUR A	Fruits and Nuts	0.5	0.8	0.9
103	EUR A	Other foods	0	0	0.01
103	EUR B	Vegetables (excluding dried legumes)	0.15	0.3	0.45
103	EUR B	Fruits and Nuts	0.5	0.7	0.8
103	EUR B	Other foods	0	0	0.01
103	EUR C	Vegetables (excluding dried legumes)	0.15	0.35	0.45
103	EUR C	Fruits and Nuts	0.5	0.65	0.9
103	EUR C	Other foods	0	0.05	0.1
103	EMR B	Vegetables (excluding dried legumes)	0.1	0.3	0.45
103	EMR B	Fruits and Nuts	0.4	0.65	0.8
103	EMR B	Other foods	0	0.05	0.1
103	EMR D	Vegetables (excluding dried legumes)	0	0	0
103	EMR D	Fruits and Nuts	0	0	0
103	EMR D	Other foods	0	0	0
103	SEAR B	Vegetables (excluding dried legumes)	0	0	0
103	SEAR B	Fruits and Nuts	0	0	0
103	SEAR B	Other foods	0	0	0
103	SEAR D	Vegetables (excluding dried legumes)	0	0	0
103	SEAR D	Fruits and Nuts	0	0	0
103	SEAR D	Other foods	0	0	0
103	WPR A	Vegetables (excluding dried legumes)	0.15	0.3	0.45
103	WPR A	Fruits and Nuts	0.5	0.7	0.9
103	WPR A	Other foods	0	0	0.01
103	WPR B	Vegetables (excluding dried legumes)	0	0	0
103	WPR B	Fruits and Nuts	0	0	0
103	WPR B	Other foods	0	0	0
104	AFR D	Vegetables (excluding dried legumes)	0.2	0.95	1
104	AFR D	Fruits and Nuts	0.02	0.05	0.1
104	AFR D	Other foods	0	0	0
104	AFR E	Vegetables (excluding dried legumes)	0.15	0.9	0.95
104	AFR E	Fruits and Nuts	0.01	0.05	0.1
104	AFR E	Other foods	0	0	0
104	AMR A	Vegetables (excluding dried legumes)	0.25	0.75	0.85
104	AMR A	Fruits and Nuts	0.15	0.25	0.3
104	AMR A	Other foods	0	0	0
104	AMR B	Vegetables (excluding dried legumes)	0.3	0.65	0.9
104	AMR B	Fruits and Nuts	0.15	0.3	0.4
104	AMR B	Other foods	0	0	0
104	AMR D	Vegetables (excluding dried legumes)	0.3	0.6	0.9
104	AMR D	Fruits and Nuts	0.15	0.4	0.45
104	AMR D	Other foods	0	0	0
104	EUR A	Vegetables (excluding dried legumes)	0.25	0.75	0.9
104	EUR A	Fruits and Nuts	0.15	0.25	0.45
104	EUR A	Other foods	0	0	0
104	EUR B	Vegetables (excluding dried legumes)	0.25	0.8	0.9
104	EUR B	Fruits and Nuts	0.1	0.2	0.3
104	EUR B	Other foods	0	0	0
104	EUR C	Vegetables (excluding dried legumes)	0.2	0.8	0.9
104	EUR C	Fruits and Nuts	0.1	0.2	0.3
104	EUR C	Other foods	0	0	0
104	EMR B	Vegetables (excluding dried legumes)	0.25	0.8	0.9
104	EMR B	Fruits and Nuts	0.1	0.2	0.3
104	EMR B	Other foods	0	0	0
104	EMR D	Vegetables (excluding dried legumes)	0.3	0.85	0.95
104	EMR D	Fruits and Nuts	0.05	0.15	0.25
104	EMR D	Other foods	0	0	0
104	SEAR B	Vegetables (excluding dried legumes)	0.15	0.75	0.85
104	SEAR B	Fruits and Nuts	0.1	0.25	0.3
104	SEAR B	Other foods	0	0	0
104	SEAR D	Vegetables (excluding dried legumes)	0.2	0.8	0.9
104	SEAR D	Fruits and Nuts	0.1	0.2	0.35
104	SEAR D	Other foods	0	0	0
104	WPR A	Vegetables (excluding dried legumes)	0.15	0.75	0.9
104	WPR A	Fruits and Nuts	0.1	0.25	0.35
104	WPR A	Other foods	0	0	0
104	WPR B	Vegetables (excluding dried legumes)	0.2	0.85	0.9
104	WPR B	Fruits and Nuts	0.05	0.15	0.25
104	WPR B	Other foods	0	0	0
120	AFR D	Vegetables (excluding dried legumes)	0	0	0
120	AFR D	Fruits and Nuts	0	0	0
120	AFR D	Other foods	0	0	0
120	AFR E	Vegetables (excluding dried legumes)	0	0	0
120	AFR E	Fruits and Nuts	0	0	0
120	AFR E	Other foods	0	0	0
120	AMR A	Vegetables (excluding dried legumes)	0.1	0.3	0.6
120	AMR A	Fruits and Nuts	0.5	0.7	0.95
120	AMR A	Other foods	0	0	0
120	AMR B	Vegetables (excluding dried legumes)	0	0	0
120	AMR B	Fruits and Nuts	0	0	0
120	AMR B	Other foods	0	0	0
120	AMR D	Vegetables (excluding dried legumes)	0	0	0
120	AMR D	Fruits and Nuts	0	0	0
120	AMR D	Other foods	0	0	0
120	EUR A	Vegetables (excluding dried legumes)	0.1	0.3	0.6
120	EUR A	Fruits and Nuts	0.5	0.7	0.95
120	EUR A	Other foods	0	0	0
120	EUR B	Vegetables (excluding dried legumes)	0.1	0.3	0.6
120	EUR B	Fruits and Nuts	0.5	0.7	0.95
120	EUR B	Other foods	0	0	0
120	EUR C	Vegetables (excluding dried legumes)	0.1	0.3	0.6
120	EUR C	Fruits and Nuts	0.5	0.7	0.95
120	EUR C	Other foods	0	0	0
120	EMR B	Vegetables (excluding dried legumes)	0.1	0.3	0.6
120	EMR B	Fruits and Nuts	0.5	0.7	0.95
120	EMR B	Other foods	0	0	0
120	EMR D	Vegetables (excluding dried legumes)	0	0	0
120	EMR D	Fruits and Nuts	0	0	0
120	EMR D	Other foods	0	0	0
120	SEAR B	Vegetables (excluding dried legumes)	0	0	0
120	SEAR B	Fruits and Nuts	0	0	0
120	SEAR B	Other foods	0	0	0
120	SEAR D	Vegetables (excluding dried legumes)	0	0	0
120	SEAR D	Fruits and Nuts	0	0	0
120	SEAR D	Other foods	0	0	0
120	WPR A	Vegetables (excluding dried legumes)	0	0	0
120	WPR A	Fruits and Nuts	0	0	0
120	WPR A	Other foods	0	0	0
120	WPR B	Vegetables (excluding dried legumes)	0.1	0.3	0.6
120	WPR B	Fruits and Nuts	0.4	0.6	0.9
120	WPR B	Other foods	0.05	0.1	0.4

## Sheet: Entamoeba
Entamoeba histolytica
Expert ID	Region	Food category	5th percentile	50th percentile	95th percentile
47	AFR D	Vegetables (excluding dried legumes)	0.2	0.8	1		This file contains anonymized data that was used in estimating results presented in:
47	AFR D	Fruits and Nuts	0.05	0.2	0.8
47	AFR D	Other foods	0	0.05	0.2		Hoffmann et al., Estimates of the relative role of specific food categories in causing major foodborne enteric
47	AFR E	Vegetables (excluding dried legumes)	0.2	0.8	1		diseases around the world: Findings from a World Health Organization structured expert elicitation.
47	AFR E	Fruits and Nuts	0.05	0.2	0.8		PlosOne ___date___ and url.
47	AFR E	Other foods	0	0.05	0.2
47	AMR A	Vegetables (excluding dried legumes)	0.2	0.8	1
47	AMR A	Fruits and Nuts	0.05	0.2	0.8
47	AMR A	Other foods	0	0.05	0.2
47	AMR B	Vegetables (excluding dried legumes)	0.2	0.8	1
47	AMR B	Fruits and Nuts	0.05	0.2	0.8
47	AMR B	Other foods	0	0.05	0.2
47	AMR D	Vegetables (excluding dried legumes)	0.2	0.8	1
47	AMR D	Fruits and Nuts	0.05	0.2	0.8
47	AMR D	Other foods	0	0.05	0.2
47	EUR A	Vegetables (excluding dried legumes)	0.2	0.8	1
47	EUR A	Fruits and Nuts	0.05	0.2	0.8
47	EUR A	Other foods	0	0.05	0.2
47	EUR B	Vegetables (excluding dried legumes)	0.2	0.8	1
47	EUR B	Fruits and Nuts	0.05	0.2	0.8
47	EUR B	Other foods	0	0.05	0.2
47	EUR C	Vegetables (excluding dried legumes)	0.2	0.8	1
47	EUR C	Fruits and Nuts	0.05	0.2	0.8
47	EUR C	Other foods	0	0.05	0.2
47	EMR B	Vegetables (excluding dried legumes)	0.2	0.8	1
47	EMR B	Fruits and Nuts	0.05	0.2	0.8
47	EMR B	Other foods	0	0.05	0.2
47	EMR D	Vegetables (excluding dried legumes)	0.2	0.8	1
47	EMR D	Fruits and Nuts	0.05	0.2	0.8
47	EMR D	Other foods	0	0.05	0.2
47	SEAR B	Vegetables (excluding dried legumes)	0.2	0.8	1
47	SEAR B	Fruits and Nuts	0.05	0.2	0.8
47	SEAR B	Other foods	0	0.05	0.2
47	SEAR D	Vegetables (excluding dried legumes)	0.2	0.8	1
47	SEAR D	Fruits and Nuts	0.05	0.2	0.8
47	SEAR D	Other foods	0	0.05	0.2
47	WPR A	Vegetables (excluding dried legumes)	0.2	0.8	1
47	WPR A	Fruits and Nuts	0.05	0.2	0.8
47	WPR A	Other foods	0	0.05	0.2
47	WPR B	Vegetables (excluding dried legumes)	0.2	0.8	1
47	WPR B	Fruits and Nuts	0.05	0.2	0.8
47	WPR B	Other foods	0	0.05	0.2
49	AFR D	Vegetables (excluding dried legumes)	0.3	0.4	0.5
49	AFR D	Fruits and Nuts	0.4	0.6	0.7
49	AFR D	Other foods
49	AFR E	Vegetables (excluding dried legumes)	0.3	0.4	0.5
49	AFR E	Fruits and Nuts	0.4	0.6	0.7
49	AFR E	Other foods
49	AMR A	Vegetables (excluding dried legumes)	0.3	0.4	0.5
49	AMR A	Fruits and Nuts	0.5	0.6	0.7
49	AMR A	Other foods
49	AMR B	Vegetables (excluding dried legumes)	0.3	0.4	0.5
49	AMR B	Fruits and Nuts	0.5	0.6	0.7
49	AMR B	Other foods
49	AMR D	Vegetables (excluding dried legumes)	0.3	0.4	0.5
49	AMR D	Fruits and Nuts	0.4	0.6	0.7
49	AMR D	Other foods
49	EUR A	Vegetables (excluding dried legumes)	0.3	0.4	0.5
49	EUR A	Fruits and Nuts	0.5	0.6	0.7
49	EUR A	Other foods
49	EUR B	Vegetables (excluding dried legumes)	0.3	0.4	0.5
49	EUR B	Fruits and Nuts	0.5	0.6	0.7
49	EUR B	Other foods
49	EUR C	Vegetables (excluding dried legumes)	0.3	0.4	0.5
49	EUR C	Fruits and Nuts	0.5	0.6	0.7
49	EUR C	Other foods
49	EMR B	Vegetables (excluding dried legumes)	0.3	0.4	0.5
49	EMR B	Fruits and Nuts	0.5	0.6	0.7
49	EMR B	Other foods
49	EMR D	Vegetables (excluding dried legumes)	0.3	0.4	0.5
49	EMR D	Fruits and Nuts	0.5	0.6	0.7
49	EMR D	Other foods
49	SEAR B	Vegetables (excluding dried legumes)	0.3	0.4	0.5
49	SEAR B	Fruits and Nuts	0.5	0.6	0.7
49	SEAR B	Other foods
49	SEAR D	Vegetables (excluding dried legumes)	0.3	0.4	0.5
49	SEAR D	Fruits and Nuts	0.5	0.6	0.7
49	SEAR D	Other foods
49	WPR A	Vegetables (excluding dried legumes)	0.3	0.4	0.5
49	WPR A	Fruits and Nuts	0.5	0.6	0.7
49	WPR A	Other foods
49	WPR B	Vegetables (excluding dried legumes)	0.3	0.4	0.5
49	WPR B	Fruits and Nuts	0.5	0.6	0.7
49	WPR B	Other foods
50	AFR D	Vegetables (excluding dried legumes)	0.75	0.85	0.95
50	AFR D	Fruits and Nuts	0.05	0.1	0.15
50	AFR D	Other foods	0.03	0.05	0.07
50	AFR E	Vegetables (excluding dried legumes)	0.75	0.85	0.95
50	AFR E	Fruits and Nuts	0.05	0.1	0.15
50	AFR E	Other foods	0.03	0.05	0.07
50	AMR A	Vegetables (excluding dried legumes)	0.8	0.87	0.95
50	AMR A	Fruits and Nuts	0.05	0.1	0.15
50	AMR A	Other foods	0.01	0.03	0.05
50	AMR B	Vegetables (excluding dried legumes)	0.75	0.82	0.9
50	AMR B	Fruits and Nuts	0.1	0.13	0.2
50	AMR B	Other foods	0.03	0.05	0.07
50	AMR D	Vegetables (excluding dried legumes)	0.75	0.82	0.9
50	AMR D	Fruits and Nuts	0.1	0.13	0.2
50	AMR D	Other foods	0.03	0.05	0.07
50	EUR A	Vegetables (excluding dried legumes)	0.8	0.87	0.95
50	EUR A	Fruits and Nuts	0.05	0.1	0.15
50	EUR A	Other foods	0.01	0.03	0.05
50	EUR B	Vegetables (excluding dried legumes)	0.8	0.85	0.95
50	EUR B	Fruits and Nuts	0.05	0.1	0.15
50	EUR B	Other foods	0.03	0.05	0.07
50	EUR C	Vegetables (excluding dried legumes)	0.8	0.85	0.95
50	EUR C	Fruits and Nuts	0.05	0.1	0.15
50	EUR C	Other foods	0.03	0.05	0.07
50	EMR B	Vegetables (excluding dried legumes)	0.8	0.85	0.95
50	EMR B	Fruits and Nuts	0.05	0.1	0.15
50	EMR B	Other foods	0.03	0.05	0.07
50	EMR D	Vegetables (excluding dried legumes)	0.8	0.85	0.95
50	EMR D	Fruits and Nuts	0.05	0.1	0.15
50	EMR D	Other foods	0.03	0.05	0.07
50	SEAR B	Vegetables (excluding dried legumes)	0.75	0.82	0.9
50	SEAR B	Fruits and Nuts	0.1	0.13	0.2
50	SEAR B	Other foods	0.03	0.05	0.07
50	SEAR D	Vegetables (excluding dried legumes)	0.75	0.82	0.9
50	SEAR D	Fruits and Nuts	0.1	0.13	0.2
50	SEAR D	Other foods	0.03	0.05	0.07
50	WPR A	Vegetables (excluding dried legumes)	0.75	0.87	0.95
50	WPR A	Fruits and Nuts	0.05	0.1	0.15
50	WPR A	Other foods	0.01	0.03	0.05
50	WPR B	Vegetables (excluding dried legumes)	0.75	0.82	0.9
50	WPR B	Fruits and Nuts	0.1	0.13	0.2
50	WPR B	Other foods	0.03	0.05	0.07
53	AFR D	Vegetables (excluding dried legumes)	0.2	0.48	0.7
53	AFR D	Fruits and Nuts	0.2	0.5	0.6
53	AFR D	Other foods	0.01	0.02	0.03
53	AFR E	Vegetables (excluding dried legumes)	0.2	0.5	0.7
53	AFR E	Fruits and Nuts	0.2	0.48	0.6
53	AFR E	Other foods	0.01	0.02	0.03
53	AMR A	Vegetables (excluding dried legumes)	0.2	0.5	0.7
53	AMR A	Fruits and Nuts	0.2	0.48	0.6
53	AMR A	Other foods	0.01	0.02	0.03
53	AMR B	Vegetables (excluding dried legumes)	0.2	0.5	0.7
53	AMR B	Fruits and Nuts	0.2	0.48	0.6
53	AMR B	Other foods	0	0.02	0.03
53	AMR D	Vegetables (excluding dried legumes)	0.2	0.5	0.7
53	AMR D	Fruits and Nuts	0.2	0.48	0.6
53	AMR D	Other foods	0.01	0.02	0.03
53	EUR A	Vegetables (excluding dried legumes)	0.4	0.6	0.7
53	EUR A	Fruits and Nuts	0.2	0.38	0.5
53	EUR A	Other foods	0	0.02	0.03
53	EUR B	Vegetables (excluding dried legumes)	0.2	0.4	0.5
53	EUR B	Fruits and Nuts	0.4	0.58	0.7
53	EUR B	Other foods	0.01	0.02	0.03
53	EUR C	Vegetables (excluding dried legumes)	0.2	0.4	0.5
53	EUR C	Fruits and Nuts	0.4	0.6	0.7
53	EUR C	Other foods	0.01	0.02	0.03
53	EMR B	Vegetables (excluding dried legumes)	0.2	0.4	0.5
53	EMR B	Fruits and Nuts	0.4	0.6	0.7
53	EMR B	Other foods	0.01	0.03	0.04
53	EMR D	Vegetables (excluding dried legumes)	0.2	0.4	0.5
53	EMR D	Fruits and Nuts	0.4	0.6	0.7
53	EMR D	Other foods	0.01	0.02	0.03
53	SEAR B	Vegetables (excluding dried legumes)	0.4	0.6	0.7
53	SEAR B	Fruits and Nuts	0.2	0.38	0.5
53	SEAR B	Other foods	0.01	0.02	0.03
53	SEAR D	Vegetables (excluding dried legumes)	0.4	0.6	0.7
53	SEAR D	Fruits and Nuts	0.2	0.38	0.5
53	SEAR D	Other foods	0.01	0.02	0.03
53	WPR A	Vegetables (excluding dried legumes)	0.3	0.5	0.6
53	WPR A	Fruits and Nuts	0.3	0.48	0.6
53	WPR A	Other foods	0.01	0.02	0.03
53	WPR B	Vegetables (excluding dried legumes)	0.3	0.5	0.6
53	WPR B	Fruits and Nuts	0.3	0.48	0.6
53	WPR B	Other foods	0.01	0.02	0.03
55	AFR D	Vegetables (excluding dried legumes)	0.35	0.8	0.95
55	AFR D	Fruits and Nuts	0.1	0.2	0.65
55	AFR D	Other foods	0.01	0.02	0.1
55	AFR E	Vegetables (excluding dried legumes)	0.35	0.8	0.95
55	AFR E	Fruits and Nuts	0.1	0.2	0.65
55	AFR E	Other foods	0.01	0.02	0.1
55	AMR A	Vegetables (excluding dried legumes)	0.35	0.8	0.95
55	AMR A	Fruits and Nuts	0.1	0.2	0.65
55	AMR A	Other foods	0.01	0.02	0.1
55	AMR B	Vegetables (excluding dried legumes)	0.35	0.8	0.95
55	AMR B	Fruits and Nuts	0.1	0.2	0.65
55	AMR B	Other foods	0.01	0.02	0.1
55	AMR D	Vegetables (excluding dried legumes)	0.35	0.8	0.95
55	AMR D	Fruits and Nuts	0.1	0.2	0.65
55	AMR D	Other foods	0.01	0.02	0.1
55	EUR A	Vegetables (excluding dried legumes)	0.35	0.8	0.95
55	EUR A	Fruits and Nuts	0.1	0.2	0.65
55	EUR A	Other foods	0.01	0.02	0.1
55	EUR B	Vegetables (excluding dried legumes)	0.35	0.8	0.95
55	EUR B	Fruits and Nuts	0.1	0.2	0.65
55	EUR B	Other foods	0.01	0.02	0.1
55	EUR C	Vegetables (excluding dried legumes)	0.35	0.8	0.95
55	EUR C	Fruits and Nuts	0.1	0.2	0.65
55	EUR C	Other foods	0.01	0.02	0.1
55	EMR B	Vegetables (excluding dried legumes)	0.35	0.8	0.95
55	EMR B	Fruits and Nuts	0.1	0.2	0.65
55	EMR B	Other foods	0.01	0.02	0.1
55	EMR D	Vegetables (excluding dried legumes)	0.35	0.8	0.95
55	EMR D	Fruits and Nuts	0.1	0.2	0.65
55	EMR D	Other foods	0.01	0.02	0.1
55	SEAR B	Vegetables (excluding dried legumes)	0.35	0.8	0.95
55	SEAR B	Fruits and Nuts	0.1	0.2	0.65
55	SEAR B	Other foods	0.01	0.02	0.1
55	SEAR D	Vegetables (excluding dried legumes)	0.35	0.8	0.95
55	SEAR D	Fruits and Nuts	0.1	0.2	0.65
55	SEAR D	Other foods	0.01	0.02	0.1
55	WPR A	Vegetables (excluding dried legumes)	0.35	0.8	0.95
55	WPR A	Fruits and Nuts	0.1	0.2	0.65
55	WPR A	Other foods	0.01	0.02	0.1
55	WPR B	Vegetables (excluding dried legumes)	0.35	0.8	0.95
55	WPR B	Fruits and Nuts	0.1	0.2	0.65
55	WPR B	Other foods	0.01	0.02	0.1
200	AFR D	Vegetables (excluding dried legumes)	0.3	0.6	0.75
200	AFR D	Fruits and Nuts	0.2	0.4	0.75
200	AFR D	Other foods	0	0	0
200	AFR E	Vegetables (excluding dried legumes)	0.3	0.6	0.75
200	AFR E	Fruits and Nuts	0.2	0.4	0.75
200	AFR E	Other foods	0	0	0
200	AMR A	Vegetables (excluding dried legumes)	0.3	0.6	0.75
200	AMR A	Fruits and Nuts	0.2	0.4	0.75
200	AMR A	Other foods	0	0	0
200	AMR B	Vegetables (excluding dried legumes)	0.3	0.6	0.75
200	AMR B	Fruits and Nuts	0.2	0.4	0.75
200	AMR B	Other foods	0	0	0
200	AMR D	Vegetables (excluding dried legumes)	0.3	0.6	0.75
200	AMR D	Fruits and Nuts	0.2	0.4	0.75
200	AMR D	Other foods	0	0	0
200	EUR A	Vegetables (excluding dried legumes)	0.3	0.6	0.75
200	EUR A	Fruits and Nuts	0.2	0.4	0.75
200	EUR A	Other foods	0	0	0
200	EUR B	Vegetables (excluding dried legumes)	0.3	0.6	0.75
200	EUR B	Fruits and Nuts	0.2	0.4	0.75
200	EUR B	Other foods	0	0	0
200	EUR C	Vegetables (excluding dried legumes)	0.3	0.6	0.75
200	EUR C	Fruits and Nuts	0.2	0.4	0.75
200	EUR C	Other foods	0	0	0
200	EMR B	Vegetables (excluding dried legumes)	0.3	0.6	0.75
200	EMR B	Fruits and Nuts	0.2	0.4	0.75
200	EMR B	Other foods	0	0	0
200	EMR D	Vegetables (excluding dried legumes)	0.3	0.6	0.75
200	EMR D	Fruits and Nuts	0.2	0.4	0.75
200	EMR D	Other foods	0	0	0
200	SEAR B	Vegetables (excluding dried legumes)	0.3	0.6	0.75
200	SEAR B	Fruits and Nuts	0.2	0.4	0.75
200	SEAR B	Other foods	0	0	0
200	SEAR D	Vegetables (excluding dried legumes)	0.3	0.6	0.75
200	SEAR D	Fruits and Nuts	0.2	0.4	0.75
200	SEAR D	Other foods	0	0	0
200	WPR A	Vegetables (excluding dried legumes)	0.3	0.6	0.75
200	WPR A	Fruits and Nuts	0.2	0.4	0.75
200	WPR A	Other foods	0	0	0
200	WPR B	Vegetables (excluding dried legumes)	0.3	0.6	0.75
200	WPR B	Fruits and Nuts	0.2	0.4	0.75
200	WPR B	Other foods	0	0	0
267	AFR D	Vegetables (excluding dried legumes)
267	AFR D	Fruits and Nuts
267	AFR D	Other foods
267	AFR E	Vegetables (excluding dried legumes)
267	AFR E	Fruits and Nuts
267	AFR E	Other foods
267	AMR A	Vegetables (excluding dried legumes)	0.65	0.8	0.9
267	AMR A	Fruits and Nuts	0.15	0.2	0.25
267	AMR A	Other foods	0	0	0
267	AMR B	Vegetables (excluding dried legumes)	0.7	0.85	0.95
267	AMR B	Fruits and Nuts	0.1	0.15	0.2
267	AMR B	Other foods	0	0	0
267	AMR D	Vegetables (excluding dried legumes)	0.8	0.9	0.97
267	AMR D	Fruits and Nuts	0.05	0.1	0.15
267	AMR D	Other foods	0	0	0
267	EUR A	Vegetables (excluding dried legumes)
267	EUR A	Fruits and Nuts
267	EUR A	Other foods
267	EUR B	Vegetables (excluding dried legumes)
267	EUR B	Fruits and Nuts
267	EUR B	Other foods
267	EUR C	Vegetables (excluding dried legumes)
267	EUR C	Fruits and Nuts
267	EUR C	Other foods
267	EMR B	Vegetables (excluding dried legumes)
267	EMR B	Fruits and Nuts
267	EMR B	Other foods
267	EMR D	Vegetables (excluding dried legumes)
267	EMR D	Fruits and Nuts
267	EMR D	Other foods
267	SEAR B	Vegetables (excluding dried legumes)
267	SEAR B	Fruits and Nuts
267	SEAR B	Other foods
267	SEAR D	Vegetables (excluding dried legumes)
267	SEAR D	Fruits and Nuts
267	SEAR D	Other foods
267	WPR A	Vegetables (excluding dried legumes)
267	WPR A	Fruits and Nuts
267	WPR A	Other foods
267	WPR B	Vegetables (excluding dried legumes)
267	WPR B	Fruits and Nuts
267	WPR B	Other foods
277	AFR D	Vegetables (excluding dried legumes)	0.4	0.6	0.8
277	AFR D	Fruits and Nuts	0.2	0.4	0.6
277	AFR D	Other foods	0	0	0
277	AFR E	Vegetables (excluding dried legumes)	0.4	0.6	0.8
277	AFR E	Fruits and Nuts	0.2	0.4	0.6
277	AFR E	Other foods	0	0	0
277	AMR A	Vegetables (excluding dried legumes)	0.4	0.5	0.7
277	AMR A	Fruits and Nuts	0.2	0.5	0.7
277	AMR A	Other foods	0	0	0
277	AMR B	Vegetables (excluding dried legumes)	0.4	0.6	0.8
277	AMR B	Fruits and Nuts	0.2	0.4	0.6
277	AMR B	Other foods	0	0	0
277	AMR D	Vegetables (excluding dried legumes)	0.4	0.6	0.8
277	AMR D	Fruits and Nuts	0.2	0.4	0.6
277	AMR D	Other foods	0	0	0
277	EUR A	Vegetables (excluding dried legumes)	0.4	0.5	0.8
277	EUR A	Fruits and Nuts	0.2	0.5	0.7
277	EUR A	Other foods	0	0	0
277	EUR B	Vegetables (excluding dried legumes)	0.4	0.6	0.8
277	EUR B	Fruits and Nuts	0.2	0.4	0.6
277	EUR B	Other foods	0	0	0
277	EUR C	Vegetables (excluding dried legumes)	0.4	0.6	0.8
277	EUR C	Fruits and Nuts	0.2	0.4	0.6
277	EUR C	Other foods	0	0	0
277	EMR B	Vegetables (excluding dried legumes)	0.4	0.6	0.8
277	EMR B	Fruits and Nuts	0.2	0.4	0.6
277	EMR B	Other foods	0	0	0
277	EMR D	Vegetables (excluding dried legumes)	0.4	0.6	0.8
277	EMR D	Fruits and Nuts	0.2	0.4	0.6
277	EMR D	Other foods	0	0	0
277	SEAR B	Vegetables (excluding dried legumes)	0.4	0.6	0.8
277	SEAR B	Fruits and Nuts	0.2	0.4	0.6
277	SEAR B	Other foods	0	0	0
277	SEAR D	Vegetables (excluding dried legumes)	0.4	0.6	0.8
277	SEAR D	Fruits and Nuts	0.2	0.4	0.6
277	SEAR D	Other foods	0	0	0
277	WPR A	Vegetables (excluding dried legumes)	0.4	0.6	0.8
277	WPR A	Fruits and Nuts	0.2	0.4	0.6
277	WPR A	Other foods	0	0	0
277	WPR B	Vegetables (excluding dried legumes)	0.4	0.6	0.8
277	WPR B	Fruits and Nuts	0.2	0.4	0.6
277	WPR B	Other foods	0	0	0

## Sheet: Giardia
Giardia spp.
Expert ID	Region	Food category	5th percentile	50th percentile	95th percentile
47	AFR D	Vegetables (excluding dried legumes)	0.1	0.4	0.9		This file contains anonymized data that was used in estimating results presented in:
47	AFR D	Fruits and Nuts	0.1	0.3	0.9
47	AFR D	Other foods	0.1	0.3	0.9		Hoffmann et al., Estimates of the relative role of specific food categories in causing major foodborne enteric
47	AFR E	Vegetables (excluding dried legumes)	0.1	0.4	0.9		diseases around the world: Findings from a World Health Organization structured expert elicitation.
47	AFR E	Fruits and Nuts	0.1	0.3	0.9		PlosOne ___date___ and url.
47	AFR E	Other foods	0.1	0.3	0.9
47	AMR A	Vegetables (excluding dried legumes)	0.1	0.4	0.9
47	AMR A	Fruits and Nuts	0.1	0.3	0.9
47	AMR A	Other foods	0.1	0.3	0.9
47	AMR B	Vegetables (excluding dried legumes)	0.1	0.4	0.9
47	AMR B	Fruits and Nuts	0.1	0.3	0.9
47	AMR B	Other foods	0.1	0.3	0.9
47	AMR D	Vegetables (excluding dried legumes)	0.1	0.4	0.9
47	AMR D	Fruits and Nuts	0.1	0.3	0.9
47	AMR D	Other foods	0.1	0.3	0.9
47	EUR A	Vegetables (excluding dried legumes)	0.1	0.4	0.9
47	EUR A	Fruits and Nuts	0.1	0.3	0.9
47	EUR A	Other foods	0.1	0.3	0.9
47	EUR B	Vegetables (excluding dried legumes)	0.1	0.4	0.9
47	EUR B	Fruits and Nuts	0.1	0.3	0.9
47	EUR B	Other foods	0.1	0.3	0.9
47	EUR C	Vegetables (excluding dried legumes)	0.1	0.4	0.9
47	EUR C	Fruits and Nuts	0.1	0.3	0.9
47	EUR C	Other foods	0.1	0.3	0.9
47	EMR B	Vegetables (excluding dried legumes)	0.1	0.4	0.9
47	EMR B	Fruits and Nuts	0.1	0.3	0.9
47	EMR B	Other foods	0.1	0.3	0.9
47	EMR D	Vegetables (excluding dried legumes)	0.1	0.4	0.9
47	EMR D	Fruits and Nuts	0.1	0.3	0.9
47	EMR D	Other foods	0.1	0.3	0.9
47	SEAR B	Vegetables (excluding dried legumes)	0.1	0.4	0.9
47	SEAR B	Fruits and Nuts	0.1	0.3	0.9
47	SEAR B	Other foods	0.1	0.3	0.9
47	SEAR D	Vegetables (excluding dried legumes)	0.1	0.4	0.9
47	SEAR D	Fruits and Nuts	0.1	0.3	0.9
47	SEAR D	Other foods	0.1	0.3	0.9
47	WPR A	Vegetables (excluding dried legumes)	0.1	0.4	0.9
47	WPR A	Fruits and Nuts	0.1	0.3	0.9
47	WPR A	Other foods	0.1	0.3	0.9
47	WPR B	Vegetables (excluding dried legumes)	0.1	0.4	0.9
47	WPR B	Fruits and Nuts	0.1	0.3	0.9
47	WPR B	Other foods	0.1	0.3	0.9
49	AFR D	Vegetables (excluding dried legumes)	0.3	0.4	0.7
49	AFR D	Fruits and Nuts	0.3	0.55	0.8
49	AFR D	Other foods	0.02	0.05	0.1
49	AFR E	Vegetables (excluding dried legumes)	0.3	0.4	0.7
49	AFR E	Fruits and Nuts	0.3	0.55	0.8
49	AFR E	Other foods	0.02	0.05	0.1
49	AMR A	Vegetables (excluding dried legumes)	0.3	0.5	0.7
49	AMR A	Fruits and Nuts	0.3	0.5	0.7
49	AMR A	Other foods	0	0.01	0.03
49	AMR B	Vegetables (excluding dried legumes)	0.3	0.5	0.7
49	AMR B	Fruits and Nuts	0.3	0.5	0.7
49	AMR B	Other foods	0.01	0.03	0.07
49	AMR D	Vegetables (excluding dried legumes)	0.3	0.5	0.7
49	AMR D	Fruits and Nuts	0.3	0.5	0.7
49	AMR D	Other foods	0.02	0.05	0.1
49	EUR A	Vegetables (excluding dried legumes)	0.3	0.5	0.7
49	EUR A	Fruits and Nuts	0.3	0.5	0.7
49	EUR A	Other foods	0.01	0.03	0.05
49	EUR B	Vegetables (excluding dried legumes)	0.3	0.5	0.7
49	EUR B	Fruits and Nuts	0.3	0.5	0.7
49	EUR B	Other foods	0.02	0.05	0.07
49	EUR C	Vegetables (excluding dried legumes)	0.3	0.5	0.7
49	EUR C	Fruits and Nuts	0.3	0.5	0.7
49	EUR C	Other foods	0.02	0.05	0.07
49	EMR B	Vegetables (excluding dried legumes)	0.3	0.45	0.7
49	EMR B	Fruits and Nuts	0.3	0.5	0.7
49	EMR B	Other foods	0.02	0.05	0.1
49	EMR D	Vegetables (excluding dried legumes)	0.3	0.45	0.7
49	EMR D	Fruits and Nuts	0.3	0.5	0.7
49	EMR D	Other foods	0.02	0.05	0.1
49	SEAR B	Vegetables (excluding dried legumes)	0.3	0.45	0.7
49	SEAR B	Fruits and Nuts	0.3	0.5	0.7
49	SEAR B	Other foods	0.02	0.05	0.1
49	SEAR D	Vegetables (excluding dried legumes)	0.3	0.45	0.7
49	SEAR D	Fruits and Nuts	0.3	0.5	0.7
49	SEAR D	Other foods	0.02	0.05	0.1
49	WPR A	Vegetables (excluding dried legumes)	0.3	0.5	0.7
49	WPR A	Fruits and Nuts	0.3	0.5	0.7
49	WPR A	Other foods	0	0.01	0.03
49	WPR B	Vegetables (excluding dried legumes)	0.3	0.45	0.7
49	WPR B	Fruits and Nuts	0.3	0.5	0.7
49	WPR B	Other foods	0.02	0.05	0.1
50	AFR D	Vegetables (excluding dried legumes)	0.8	0.85	0.95
50	AFR D	Fruits and Nuts	0.05	0.1	0.2
50	AFR D	Other foods	0.01	0.05	0.07
50	AFR E	Vegetables (excluding dried legumes)	0.8	0.85	0.95
50	AFR E	Fruits and Nuts	0.05	0.1	0.2
50	AFR E	Other foods	0.01	0.05	0.07
50	AMR A	Vegetables (excluding dried legumes)	0.8	0.87	0.95
50	AMR A	Fruits and Nuts	0.08	0.11	0.15
50	AMR A	Other foods	0.01	0.02	0.03
50	AMR B	Vegetables (excluding dried legumes)	0.8	0.85	0.95
50	AMR B	Fruits and Nuts	0.05	0.1	0.2
50	AMR B	Other foods	0.03	0.05	0.07
50	AMR D	Vegetables (excluding dried legumes)	0.8	0.85	0.95
50	AMR D	Fruits and Nuts	0.05	0.1	0.2
50	AMR D	Other foods	0.03	0.05	0.07
50	EUR A	Vegetables (excluding dried legumes)	0.8	0.87	0.95
50	EUR A	Fruits and Nuts	0.08	0.11	0.15
50	EUR A	Other foods	0.01	0.02	0.03
50	EUR B	Vegetables (excluding dried legumes)	0.75	0.85	0.9
50	EUR B	Fruits and Nuts	0.05	0.1	0.2
50	EUR B	Other foods	0.01	0.05	0.07
50	EUR C	Vegetables (excluding dried legumes)	0.75	0.85	0.9
50	EUR C	Fruits and Nuts	0.05	0.1	0.2
50	EUR C	Other foods	0.01	0.05	0.07
50	EMR B	Vegetables (excluding dried legumes)	0.8	0.85	0.95
50	EMR B	Fruits and Nuts	0.05	0.13	0.2
50	EMR B	Other foods	0.01	0.02	0.03
50	EMR D	Vegetables (excluding dried legumes)	0.8	0.85	0.95
50	EMR D	Fruits and Nuts	0.05	0.13	0.2
50	EMR D	Other foods	0.01	0.02	0.03
50	SEAR B	Vegetables (excluding dried legumes)	0.75	0.82	0.9
50	SEAR B	Fruits and Nuts	0.1	0.15	0.2
50	SEAR B	Other foods	0.01	0.03	0.05
50	SEAR D	Vegetables (excluding dried legumes)	0.75	0.82	0.9
50	SEAR D	Fruits and Nuts	0.1	0.15	0.2
50	SEAR D	Other foods	0.01	0.03	0.05
50	WPR A	Vegetables (excluding dried legumes)	0.75	0.88	0.9
50	WPR A	Fruits and Nuts	0.05	0.1	0.15
50	WPR A	Other foods	0.01	0.02	0.03
50	WPR B	Vegetables (excluding dried legumes)	0.75	0.82	0.9
50	WPR B	Fruits and Nuts	0.1	0.15	0.2
50	WPR B	Other foods	0.01	0.03	0.05
53	AFR D	Vegetables (excluding dried legumes)	0.4	0.6	0.7
53	AFR D	Fruits and Nuts	0.3	0.38	0.6
53	AFR D	Other foods	0.01	0.02	0.04
53	AFR E	Vegetables (excluding dried legumes)	0.4	0.6	0.8
53	AFR E	Fruits and Nuts	0.3	0.38	0.6
53	AFR E	Other foods	0.01	0.02	0.04
53	AMR A	Vegetables (excluding dried legumes)	0.3	0.5	0.6
53	AMR A	Fruits and Nuts	0.3	0.48	0.6
53	AMR A	Other foods	0.01	0.02	0.03
53	AMR B	Vegetables (excluding dried legumes)	0.3	0.5	0.6
53	AMR B	Fruits and Nuts	0.3	0.48	0.6
53	AMR B	Other foods	0.01	0.02	0.04
53	AMR D	Vegetables (excluding dried legumes)	0.4	0.6	0.7
53	AMR D	Fruits and Nuts	0.3	0.38	0.6
53	AMR D	Other foods	0.01	0.02	0.04
53	EUR A	Vegetables (excluding dried legumes)	0.2	0.4	0.6
53	EUR A	Fruits and Nuts	0.4	0.58	0.7
53	EUR A	Other foods	0.01	0.02	0.03
53	EUR B	Vegetables (excluding dried legumes)	0.3	0.5	0.7
53	EUR B	Fruits and Nuts	0.3	0.48	0.7
53	EUR B	Other foods	0.01	0.02	0.04
53	EUR C	Vegetables (excluding dried legumes)	0.3	0.5	0.7
53	EUR C	Fruits and Nuts	0.3	0.48	0.7
53	EUR C	Other foods	0.01	0.02	0.04
53	EMR B	Vegetables (excluding dried legumes)	0.4	0.6	0.8
53	EMR B	Fruits and Nuts	0.2	0.38	0.6
53	EMR B	Other foods	0.01	0.02	0.04
53	EMR D	Vegetables (excluding dried legumes)	0.4	0.6	0.8
53	EMR D	Fruits and Nuts	0.2	0.38	0.6
53	EMR D	Other foods	0.01	0.02	0.04
53	SEAR B	Vegetables (excluding dried legumes)	0.2	0.4	0.6
53	SEAR B	Fruits and Nuts	0.4	0.58	0.8
53	SEAR B	Other foods	0.01	0.02	0.04
53	SEAR D	Vegetables (excluding dried legumes)	0.2	0.4	0.6
53	SEAR D	Fruits and Nuts	0.4	0.58	0.8
53	SEAR D	Other foods	0.01	0.02	0.04
53	WPR A	Vegetables (excluding dried legumes)	0.4	0.6	0.8
53	WPR A	Fruits and Nuts	0.2	0.38	0.6
53	WPR A	Other foods	0.01	0.02	0.03
53	WPR B	Vegetables (excluding dried legumes)	0.5	0.7	0.8
53	WPR B	Fruits and Nuts	0.1	0.28	0.5
53	WPR B	Other foods	0.01	0.02	0.04
55	AFR D	Vegetables (excluding dried legumes)	0.4	0.8	0.95
55	AFR D	Fruits and Nuts	0.05	0.2	0.6
55	AFR D	Other foods	0	0	0
55	AFR E	Vegetables (excluding dried legumes)	0.4	0.8	0.95
55	AFR E	Fruits and Nuts	0.05	0.2	0.6
55	AFR E	Other foods	0	0	0
55	AMR A	Vegetables (excluding dried legumes)	0.4	0.8	0.95
55	AMR A	Fruits and Nuts	0.05	0.2	0.6
55	AMR A	Other foods	0	0	0
55	AMR B	Vegetables (excluding dried legumes)	0.4	0.8	0.95
55	AMR B	Fruits and Nuts	0.05	0.2	0.6
55	AMR B	Other foods	0	0	0
55	AMR D	Vegetables (excluding dried legumes)	0.4	0.8	0.95
55	AMR D	Fruits and Nuts	0.05	0.2	0.6
55	AMR D	Other foods	0	0	0
55	EUR A	Vegetables (excluding dried legumes)	0.4	0.8	0.95
55	EUR A	Fruits and Nuts	0.05	0.2	0.6
55	EUR A	Other foods	0	0	0
55	EUR B	Vegetables (excluding dried legumes)	0.4	0.8	0.95
55	EUR B	Fruits and Nuts	0.05	0.2	0.6
55	EUR B	Other foods	0	0	0
55	EUR C	Vegetables (excluding dried legumes)	0.4	0.8	0.95
55	EUR C	Fruits and Nuts	0.05	0.2	0.6
55	EUR C	Other foods	0	0	0
55	EMR B	Vegetables (excluding dried legumes)	0.4	0.8	0.95
55	EMR B	Fruits and Nuts	0.05	0.2	0.6
55	EMR B	Other foods	0	0	0
55	EMR D	Vegetables (excluding dried legumes)	0.4	0.8	0.95
55	EMR D	Fruits and Nuts	0.05	0.2	0.6
55	EMR D	Other foods	0	0	0
55	SEAR B	Vegetables (excluding dried legumes)	0.4	0.8	0.95
55	SEAR B	Fruits and Nuts	0.05	0.2	0.6
55	SEAR B	Other foods	0	0	0
55	SEAR D	Vegetables (excluding dried legumes)	0.4	0.8	0.95
55	SEAR D	Fruits and Nuts	0.05	0.2	0.6
55	SEAR D	Other foods	0	0	0
55	WPR A	Vegetables (excluding dried legumes)	0.4	0.8	0.95
55	WPR A	Fruits and Nuts	0.05	0.2	0.6
55	WPR A	Other foods	0	0	0
55	WPR B	Vegetables (excluding dried legumes)	0.4	0.8	0.95
55	WPR B	Fruits and Nuts	0.05	0.2	0.6
55	WPR B	Other foods	0	0	0
200	AFR D	Vegetables (excluding dried legumes)	0.3	0.6	0.8
200	AFR D	Fruits and Nuts	0.2	0.4	0.5
200	AFR D	Other foods	0	0	0
200	AFR E	Vegetables (excluding dried legumes)	0.3	0.6	0.8
200	AFR E	Fruits and Nuts	0.2	0.4	0.5
200	AFR E	Other foods	0	0	0
200	AMR A	Vegetables (excluding dried legumes)	0.3	0.6	0.8
200	AMR A	Fruits and Nuts	0.2	0.4	0.5
200	AMR A	Other foods	0	0	0
200	AMR B	Vegetables (excluding dried legumes)	0.3	0.6	0.8
200	AMR B	Fruits and Nuts	0.2	0.4	0.5
200	AMR B	Other foods	0	0	0
200	AMR D	Vegetables (excluding dried legumes)	0.3	0.6	0.8
200	AMR D	Fruits and Nuts	0.2	0.4	0.5
200	AMR D	Other foods	0	0	0
200	EUR A	Vegetables (excluding dried legumes)	0.3	0.6	0.8
200	EUR A	Fruits and Nuts	0.2	0.4	0.5
200	EUR A	Other foods	0	0	0
200	EUR B	Vegetables (excluding dried legumes)	0.3	0.6	0.8
200	EUR B	Fruits and Nuts	0.2	0.4	0.5
200	EUR B	Other foods	0	0	0
200	EUR C	Vegetables (excluding dried legumes)	0.3	0.6	0.8
200	EUR C	Fruits and Nuts	0.2	0.4	0.5
200	EUR C	Other foods	0	0	0
200	EMR B	Vegetables (excluding dried legumes)	0.3	0.6	0.8
200	EMR B	Fruits and Nuts	0.2	0.4	0.5
200	EMR B	Other foods	0	0	0
200	EMR D	Vegetables (excluding dried legumes)	0.3	0.6	0.8
200	EMR D	Fruits and Nuts	0.2	0.4	0.5
200	EMR D	Other foods	0	0	0
200	SEAR B	Vegetables (excluding dried legumes)	0.3	0.6	0.8
200	SEAR B	Fruits and Nuts	0.2	0.4	0.5
200	SEAR B	Other foods	0	0	0
200	SEAR D	Vegetables (excluding dried legumes)	0.3	0.6	0.8
200	SEAR D	Fruits and Nuts	0.2	0.4	0.5
200	SEAR D	Other foods	0	0	0
200	WPR A	Vegetables (excluding dried legumes)	0.3	0.6	0.8
200	WPR A	Fruits and Nuts	0.2	0.4	0.5
200	WPR A	Other foods	0	0	0
200	WPR B	Vegetables (excluding dried legumes)	0.3	0.6	0.8
200	WPR B	Fruits and Nuts	0.2	0.4	0.5
200	WPR B	Other foods	0	0	0
267	AFR D	Vegetables (excluding dried legumes)
267	AFR D	Fruits and Nuts
267	AFR D	Other foods
267	AFR E	Vegetables (excluding dried legumes)
267	AFR E	Fruits and Nuts
267	AFR E	Other foods
267	AMR A	Vegetables (excluding dried legumes)	0.4	0.7	0.91
267	AMR A	Fruits and Nuts	0.2	0.3	0.4
267	AMR A	Other foods	0	0	0
267	AMR B	Vegetables (excluding dried legumes)	0.6	0.8	0.9
267	AMR B	Fruits and Nuts	0.1	0.2	0.3
267	AMR B	Other foods	0	0	0
267	AMR D	Vegetables (excluding dried legumes)	0.8	0.9	0.95
267	AMR D	Fruits and Nuts	0.05	0.1	0.15
267	AMR D	Other foods	0	0	0
267	EUR A	Vegetables (excluding dried legumes)
267	EUR A	Fruits and Nuts
267	EUR A	Other foods
267	EUR B	Vegetables (excluding dried legumes)
267	EUR B	Fruits and Nuts
267	EUR B	Other foods
267	EUR C	Vegetables (excluding dried legumes)
267	EUR C	Fruits and Nuts
267	EUR C	Other foods
267	EMR B	Vegetables (excluding dried legumes)
267	EMR B	Fruits and Nuts
267	EMR B	Other foods
267	EMR D	Vegetables (excluding dried legumes)
267	EMR D	Fruits and Nuts
267	EMR D	Other foods
267	SEAR B	Vegetables (excluding dried legumes)
267	SEAR B	Fruits and Nuts
267	SEAR B	Other foods
267	SEAR D	Vegetables (excluding dried legumes)
267	SEAR D	Fruits and Nuts
267	SEAR D	Other foods
267	WPR A	Vegetables (excluding dried legumes)
267	WPR A	Fruits and Nuts
267	WPR A	Other foods
267	WPR B	Vegetables (excluding dried legumes)
267	WPR B	Fruits and Nuts
267	WPR B	Other foods
277	AFR D	Vegetables (excluding dried legumes)	0.2	0.4	0.6
277	AFR D	Fruits and Nuts	0.4	0.5	0.8
277	AFR D	Other foods	0.05	0.1	0.2
277	AFR E	Vegetables (excluding dried legumes)	0.2	0.4	0.6
277	AFR E	Fruits and Nuts	0.4	0.5	0.8
277	AFR E	Other foods	0.05	0.1	0.2
277	AMR A	Vegetables (excluding dried legumes)	0.2	0.5	0.6
277	AMR A	Fruits and Nuts	0.4	0.5	0.8
277	AMR A	Other foods	0	0	0
277	AMR B	Vegetables (excluding dried legumes)	0.2	0.4	0.6
277	AMR B	Fruits and Nuts	0.4	0.5	0.8
277	AMR B	Other foods	0.05	0.1	0.2
277	AMR D	Vegetables (excluding dried legumes)	0.2	0.4	0.6
277	AMR D	Fruits and Nuts	0.4	0.6	0.8
277	AMR D	Other foods	0	0	0
277	EUR A	Vegetables (excluding dried legumes)	0.2	0.4	0.6
277	EUR A	Fruits and Nuts	0.4	0.6	0.8
277	EUR A	Other foods	0	0	0
277	EUR B	Vegetables (excluding dried legumes)	0.2	0.4	0.6
277	EUR B	Fruits and Nuts	0.4	0.6	0.8
277	EUR B	Other foods	0	0	0
277	EUR C	Vegetables (excluding dried legumes)	0.2	0.4	0.6
277	EUR C	Fruits and Nuts	0.4	0.5	0.8
277	EUR C	Other foods	0.05	0.1	0.2
277	EMR B	Vegetables (excluding dried legumes)	0.2	0.4	0.6
277	EMR B	Fruits and Nuts	0.4	0.6	0.8
277	EMR B	Other foods	0	0	0
277	EMR D	Vegetables (excluding dried legumes)	0.2	0.4	0.6
277	EMR D	Fruits and Nuts	0.4	0.6	0.8
277	EMR D	Other foods	0	0	0
277	SEAR B	Vegetables (excluding dried legumes)	0.2	0.4	0.6
277	SEAR B	Fruits and Nuts	0.4	0.6	0.8
277	SEAR B	Other foods	0	0	0
277	SEAR D	Vegetables (excluding dried legumes)	0.2	0.4	0.6
277	SEAR D	Fruits and Nuts	0.4	0.6	0.8
277	SEAR D	Other foods	0	0	0
277	WPR A	Vegetables (excluding dried legumes)	0.2	0.4	0.6
277	WPR A	Fruits and Nuts	0.4	0.6	0.8
277	WPR A	Other foods	0	0	0
277	WPR B	Vegetables (excluding dried legumes)	0.2	0.4	0.6
277	WPR B	Fruits and Nuts	0.4	0.6	0.8
277	WPR B	Other foods	0	0	0

[truncated: 3 more sheets: Salmonella, STEC, Toxoplasma]
